# Supplementary material for: Assessing Need for Transesophageal Echocardiography in Clinically Improving Patients at Risk for Infective Endocarditis: A Preliminary Retrospective Cohort Study in a Community Based Health System
Source: Research Square preprint supplement (doi:10.21203/rs.3.rs-7042094/v1), 2025-09-25
Supplement: Supplementary file 1 [file 9aa344af05a6f42164f773a5.xlsx]

## Sheet: RAW
Subject #	Admission Date	Discharge Date	LOS	Age	Sex	Race	Comorbidity present (at least 1)?	IVDU	Prosthetic Valve	Intracardiac device	Chronic in-line cath	Previous IE	Cardio-structural abnormality	Type of abnormality	Bcx initial	Bcx repeat positive?	Total sets of positive Bcx	Date initial positive Bcx	Date last positive Bcx	Alternative source of infx?	OM?	Cellulitis or open wound?	Line related?	Abscess?	Intra-abdominal?	PNA?	UTI?	Other	Abx used?	Abx tx? (ended w/)	Planned longterm abx tx (~4-6wks) +/- PICC?	fever?	< 3 days defervescence or remained afebrile?	WBC downtrend or remained nrml?	TTE used?	TTE date	TTE new valvular veg?	TTE new worsened fxnl findings from previous TTEs?	TEE used?	TEE date	TEE new valvular veg?	TEE new anatomical/fxnl findings?	Abx/tx changed based off TEE?	Pt required ICU level of care?	Comments
1	2024-05-30	2024-06-19	20	85	1	2	1	0	1	1	0	0	1	mod TR, MR, AS w/ TAVR, CABG 2000	Methicillin-Resistant Staphylococcus aureus	1	11	2024-05-30	2024-06-12	0	0	0	0	0	0	0	0	0	1	Daptomycin	1	0	1	1	1	2024-05-31	0	0	1	2024-06-03	0	0	0	0	NEVER febrile, TTE prev was BEFORE CABG
2	2024-06-03			78	1	3	0	0	0	0	0	0	0		Methicillin-Resistant Staphylococcus aureus	1	6	2024-06-03	2024-06-07	1	1	0	0	0	0	0	0	0	1	Daptomycin	1	1	1	1	1	2024-06-05	0	0	0					1	OM L foot, TEE denied by cards, SICU
3	2024-06-05	2024-06-22	17	62	1	2	1	0	0	0	0	0	1	thickened AV leaf	Staphylococcus aureus	1	5	2024-06-05	2024-06-11	0	0	0	0	0	0	0	0	1	1	Ertapenem nafcillin	0	1	0	1	1	2024-06-05	0	0	1	2024-06-12	0	1	0	1	MICU, was on ertapenem, nafcillin, clindamycin early on, source septic arthritis R knee aspiration, TTE this adm showed mod-sev AR
4	2024-06-06	2024-06-12	6	77	1	2	0	0	0	0	0	0	0		Staphylococcus aureus	1	2	2024-06-06	2024-06-07	1	0	0	0	0	0	0	1	1	1	cefazolin	0	1	1	1	1	2024-06-07	0	0	1	2024-06-10	0	0	0	0	infected kidney stone
5	2024-06-10	2024-06-13	3	71	1	2	1	0	0	0	1	1	1	G3DD, sev LA dilation	Staphylococcus aureus	1	2	2024-06-10	2024-06-11	1	0	0	0	1	0	0	0	0	1	vanc zosyn	1	1	1	0	1	2024-06-11	1	1	0					1	prev IE on Mitral valve, TTE this adm show mod MR, tx w/ PICC, chole and psoas abscess, MICU
6	2024-06-11	2024-06-22	11	81	1	2	1	0	0	0	0	0	1	mod MR, TR, sev biatrial enlarge	Staphylococcus aureus	1	4	2024-06-11	2024-06-15	1	0	1	0	0	1	0	0	0	1	Ertapenem cefazolin	0	1	1	0	1	2024-06-12	0	0	0					1	MICU
7	2024-06-10	2024-07-12	32	45	2	2	0	0	0	0	0	0	0		Staphylococcus aureus	0	1	2024-06-12	2024-06-12	0	0	0	0	0	0	0	0	0	1	cefazolin	1	0	1	1	1	2024-06-14	0	0	0					1	MICU
8	2024-06-13	2024-06-23	10	60	1	3	1	0	0	0	0	0	1	G2DD	Staphylococcus aureus	1	2	2024-06-13	2024-06-14	1	0	0	0	1	0	0	0	0	1	cefazolin	1	1	1	1	1	2024-06-14	0	0	0					0
9	2024-06-15	2024-06-27	12	64	2	2	1	0	0	0	1	0	0		Staphylococcus aureus	1	2	2024-06-20	2024-06-21	1	0	1	0	0	0	0	0	0	1	cefazolin	1	1	1	1	1	2024-06-24	0	0	0					0	chest port for Br ca w/ brain mets, port negative as source, RUE cellulitis, planned 6wks abx but made comfort
10	2024-06-25	2024-07-02	7	46	1	2	1	1	0	0	1	1	1	1/4/24 veg seen, sev TR,	Methicillin-Resistant Staphylococcus aureus	1	5	2024-06-25	2024-06-30	1	1	1	0	1	0	0	0	0	1	Daptomycin	1	1	1	1	1	2024-06-25	1	1	0					0	recurring IE w/ mult adm, been in ICU, prior veg 1/24, bad IVDU not even candidate for PICC, this adm it was NOT due to line related, left AMA, not candidate for CT surgery, TTE this adm showed increased RV dilation and sev pulm HTN
11	2024-06-27	2024-07-28		74	1	2	1	0	0	0	0	0	1	sev calc AV, mod AS, mod TR	Staphylococcus aureus	0	1	2024-06-27	2024-06-27	1	0	1	0	0	0	1	0	0	1	vanc cefepime	0	1	1	0	1	2024-06-28	0	1	0					1	wbc confound by new L pyelo, hx of bladdar ca (no chemo), pulm nodule, TTE now shows mod-sev AS, G2DD, biatrial enlarge, MICU
12	2024-05-01	2024-05-11	10	70	1	5	1	0	0	0	1	0	1	G1DD	Staphylococcus aureus	1	2	2024-05-01	2024-05-03	1	0	0	1	0	0	0	0	0	1	cefazolin	1	1	1	1	1	2024-05-07	0	1	0					0	ESRD HD MWF, has dialysis cath which was source, suprapub cath, TTE this adm shows significant MR
13	2024-05-02	2024-05-24	22	91	2	2	1	0	0	0	0	0	1	HFrEF	Staphylococcus aureus	1	2	2024-05-02	2024-05-03	1	0	0	0	1	0	0	0	0	1	cefazolin	1	1	1	1	1	2024-05-06	0	0	0					0	had recent spinal fusion T8-12 4/2024, spine abscess, IR declined intervent, 8 wks abx maybe lifelong given infxn of hardware
14	2024-05-07	2024-05-08	1	79	2	2	0	0	0	0	0	0	0		Staphylococcus aureus	0	1	2024-05-07	2024-05-07	1	0	0	0	0	1	0	0	0	0						0									0	patient made comfort day of admission, lung ca w/ bone and brain mets
15	2024-05-07	2024-05-21	14	71	2	2	1	0	0	0	1	0	0		Staphylococcus aureus	1	3	2024-05-07	2024-05-10	1	0	1	1	0	0	0	0	0	1	cefazolin	1	1	0	1	1	2024-05-08	0	0	0					0	lung ca on chemo, chest port tip also growing MSSA, no TEE 2/2 thrombocytopenia
16	2024-05-08	2024-05-20	12	77	1	2	1	0	0	0	0	0	1	at least mod TR'	Staphylococcus aureus	0	1	2024-05-08	2024-05-08	1	0	0	0	1	0	0	1	0	1	cefazolin	1	1	1	1	1	2024-05-09	0	0	1	2024-05-13	0	0	0	0	L hip septic arthritis s/p girdlestone, UTI hx of freq straight cath, resolved findings of TR on TTE
17	2024-05-08	2024-05-23	15	83	2	2	1	0	0	0	0	0	1	PFO, sev biatrial enlarge, G1DD, mod LVH	Staphylococcus aureus	1	3	2024-05-17	2024-05-19	0	0	0	0	0	0	0	0	0	1	nafcillin	1	1	1	1	1	2024-05-20	0	0	0					1	bcx positive 10 days into admission, poss in line assc, had 1 TTE prior to pos bcx 5/9/24 and another after, MICU
18	2024-05-26	2024-06-15	20	59	1	3	1	0	0	0	0	0	1	G1DD, mod mitral annular calc	Staphylococcus aureus	1	2	2024-05-28	2024-05-29	1	0	1	0	0	0	0	0	0	1	cefazolin	1	1	1	1	1	2024-05-30	1	0	0					0	severely thickened calc mitral valve on admss TTE, CKD5 not on HD but has LUE AV fist w/ recent angioplasty, chronic L toe wound, amputated, PLANNED TEE AFTER ABX
19	2024-04-03	2024-04-13	10	51	1	3	0	0	0	0	0	0	0		Staphylococcus aureus	1	3	2024-04-03	2024-04-06	1	1	0	0	0	0	0	0	0	1	cefazolin	1	1	1	1	1	2024-04-05	0	0	1	2024-04-09	0	0	0	0	ESRD on HD right AV fistula, R foot OM
20	2024-04-10	2024-04-11	1	71	1		1	0	0	0	1	0	1	HFrEF,mod MR, sev global hypokinesia	Methicillin-Resistant Staphylococcus aureus	0	1	2024-04-11	2024-04-11	1	0	1	1	0	0	0	0	0	1	vanc cefepime	0	0	1		0									1	HF on milrinone via PICC, coded shortly after transfer to MICU
21	2024-04-11	2024-04-16	5	65	2	2	1	0	0	0	0	0	1	thickened AV leaf	Methicillin-Resistant Staphylococcus aureus	1	3	2024-04-11	2024-04-12	0	0	0	0	0	0	0	0	1	1	Daptomycin	1	0	1	1	1	2024-04-12	0	1	0					0	septic thrombus in RA, TTE echodensity c/f clot in transit and mild-mod TR, mod TR, was made comfort
22	2024-04-13	2024-04-14	1	88	2	2	0	0	0	0	0	0	0		Staphylococcus aureus	0	1	2024-04-13	2024-04-13	1	0	0	0	0	0	1	0	0	1	vanc cefepime	0	0	0		0										septic shock 2/2 PNA, made comfort care
23	2024-04-10	2024-04-19	9	85	1	2	0	0	0	0	0	0	0		Staphylococcus aureus	1	2	2024-04-14	2024-04-14	0	0	0	0	0	0	0	0	0	1	cefazolin	1	1	1	1	1	2024-04-18	0	0	0					0	4 week abx course w/ lack of acute findings
24	2024-04-18	2024-04-26	8	85	2	2	1	0	0	0	0	0	1	G1DD	Staphylococcus aureus	1	3	2024-04-18	2024-04-20	1	0	0	0	1	0	0	0	0	1	cefazolin	1	1	0	1	1	2024-04-22	0	1	0					0	psoas abscess s/p drainage on 4/23, had fevers up until drainage, TTE changes Grade II DD (grade I), dec RV fxn (nrml), mild stenosis (none); last TTE was 4 years ago
25	2024-04-19	2024-04-26	7	79	1	2	1	0	0	1	0	0	1	G2DD	Staphylococcus aureus	1	1	2024-04-19	2024-04-19	0	0	0	0	0	0	0	0	1	1	cefazolin	1	1	1	0	1	2024-04-24	0	0	1	2024-04-26	0	0	0	0	source maybe post complication scalp Moh's sx?, ESRD on HD left AV fistula,
26	2024-04-19	2024-06-04	46	46	2	2	1	1	0	0	1	0	0		Methicillin-Resistant Staphylococcus aureus	1	3	2024-04-19	2024-04-22	1	0	0	1	0	0	0	0	0	1	vanc	1	0	1	1	1	2024-04-24	0	0	1	2024-04-26	0	0	0	0	fabry disease 2 wk infusion via chest port likely source, port removed this adm w/ cath tip pos for MRSA, IVDU, hx of MRSA bact tx w/ 6wk abx
27	2024-04-20	2024-04-30	10	87	2	2	1	0	0	0	0	0	1	mod MS, G1DD	Staphylococcus aureus	1	2	2024-04-20	2024-04-21	0	0	0	0	0	0	0	0	0	1	cefazolin	1	1	1	1	1	2024-04-24	0	0	1	2024-04-29	0	0	1	0	changed from 6 to 4 week abx course
28	2024-04-23	2024-05-11	18	66	1	2	1	0	0	0	0	0	1	G2DD	Staphylococcus aureus	1	4	2024-04-23	2024-04-26	1	1	0	0	1	0	0	0	0	1	cefazolin	1	0	1	0	1	2024-04-29	0	0	0					1	lumbar OM, psoas and epidural abscess, need 8 wks for epidural abs, neurosx intervene had post op fever, MICU
29	2024-04-24	2024-05-12	18	59	2	2	1	0	0	0	1	0	1	G1DD	Staphylococcus aureus	1	3	2024-04-24	2024-04-27	1	0	0	1	0	0	0	0	0	1	cefazolin	1	1	1	1	1	2024-05-03	1	0	0					1	PICC for TPN likely source,
30	2024-04-21	2024-04-30	9	72	1	2	1	0	0	0	0	0	1	anterolat hypokinesis, apical kinesis, HFmrEF	Staphylococcus aureus	1	2	2024-04-25	2024-04-27	1	1	0	0	0	0	0	0	1	1	cefazolin	1	1	1	1	1	2024-04-26	0	0	0					0	septic arthritis L shoulder, coded on day 7, TEE was considered
31	2024-04-24	2024-05-10	16	71	2	2	1	0	0	0	0	0	1	mod TR, G1DD	Staphylococcus aureus	1	2	2024-04-27	2024-04-28	1	1	0	0	1	0	0	0	1	1	nafcillin	1	1	1	1	1	2024-05-02	0	0	0					0	source poss from OM, psoas/epidural abscess, septic phlebitis, TTE this adm shows minimal TR now
32	2024-02-25	2024-06-11	107	54	1	3	0	0	0	0	0	0	0		Methicillin-Resistant Staphylococcus aureus	1	4	2024-04-25	2024-04-28	1	0	1	0	0	0	0	0	0	1	vanc	1	1	0	1	1	2024-04-29	0	0	0					1	open sacral wound likely source, had central fevers as well, drug fever
33	2024-02-29	2024-03-28	28	28	2	2	1	1	0	0	0	0	0		Methicillin-Resistant Staphylococcus aureus	1	3	2024-02-29	2024-03-02	1	0	0	0	0	0	1	0	0	1	vanc	1	1	0	1	1	2024-03-01	0	1	1	2024-03-14	0	1	0	0	necrotizing MRSA PNA, transitioned to PO linezolid for last 2 weeks, now noting mild-mod TR on this TTE, TEE showed mod TR and thickening of TV could rep as scarring old veg? or inflammatory process
34	2024-02-21	2024-03-17	25	82	1	2	1	0	0	0	1	0	1	sev AS	Staphylococcus aureus	1	2	2024-02-29	2024-03-01	1	0	0	1	0	0	0	1	0	1	vanc	1	0	1	0	1	2024-03-01	0	1	0					1	port for chemo growing MSSA, TTE this adm show now mod-sev RV dysfxn, right atrial dilation, still sev AS, MICU
35	2024-02-20	2024-03-05	14	83	1	2	0	0	0	0	0	0	0		Staphylococcus aureus	1	2	2024-03-01	2024-03-04	1	0	0	0	0	0	1	0	0	1	vanc cefepime	0	0	1	1	0									0	pt critically sick, bcx positive days into adms, was already on abx before bcx pos
36	2024-03-04	2024-03-27	23	79	2	2	1	0	0	0	0	0	1	G3DD, mod RV dilation	Methicillin-Resistant Staphylococcus aureus	1	5	2024-03-04	2024-03-08	0	0	0	0	0	0	0	0	0	1	Daptomycin	1	1	1	1	1	2024-03-06	0	0	1	2024-03-13	0	0	0	0	needed EGD first before TEE 2/2 esoph varices
37	2024-03-05	2024-04-01	27	77	2	3	1	0	0	1	0	0	1	sev biatrial enlarge, mod TR	Staphylococcus aureus	1	3	2024-03-13	2024-03-15	0	0	0	0	0	0	0	0	0	1	cefazolin	1	0	1	1	1	2024-03-14	0	0	1	2024-03-15	1	0	0	0	TEE showed TV veg, req pacemaker removal, narrowed cef/vanc to cefazolin and was CONSIDERING CT surgery but never consulted
38	2024-03-13	2024-03-26	13	95	2	4	0	0	0	0	0	0	0		Staphylococcus aureus	1	5	2024-03-13	2024-03-17	1	0	0	0	0	0	0	0	1	1	cefazolin	1	1	1	1	1	2024-03-15	0	0	0					0	source poss excoriation nose picking??
39	2024-04-08	2024-05-13	35	42	2	4	1	1	0	0	0	0	0		Methicillin-Resistant Staphylococcus aureus	1	5	2024-04-11	2024-04-16	1	1	1	0	0	0	0	0	0	1	Daptomycin	1	1	0	1	1	2024-04-15	0	0	1	2024-04-15	0	0	0	0	scattered pos bcx, hx of MULTIPLE MRSA bacteremia and septic joint
40	2024-03-27	2024-03-29	2	64	2	2	1	0	0	0	0	0	1	G2DD	Staphylococcus aureus	1	3	2024-03-27	2024-03-28	0	0	0	0	0	0	0	0	0	1	cefazolin	1	1	1	0	1	2024-03-28	1	1	0					1	TTE this adm mitral valve veg w/ mod AS
41	2024-03-28	2024-04-08	11	87	2	2	1	0	0	1	0	0	0	HFrEF	Staphylococcus aureus	1	4	2024-03-28	2024-03-31	0	0	0	0	0	0	0	0	0	1	nafcillin	1	1	0	0	1	2024-04-01	0	0	0					0	CRT device, need lifelong abx after 6wk IV
42	2024-03-30	2024-04-30	31	69	2	3	0	0	0	0	0	0	0		Methicillin Resistant Staphylococcus aureus	0	1	2024-03-30	2024-03-30	0	0	0	0	0	0	0	0	0	1	Daptomycin	1	1	1	1	1	2024-04-01	0	1	1	2024-04-03	0	0	1	0	TTE this adm G2DD, developed asp pna later on, abx adj from vanc to dapt after TEE
43	2024-05-31	2024-06-12	12	70	2	2	0	0	0	0	0	0	0		Streptococcus mutans	0	1	2024-06-01	2024-06-01	1	1	0	0	0	0	0	0	0	1	ceftriaxone	1	1	1	1	1	2024-06-05	0	1	0					0	OM symph pupis, did 6-8wk for OM, TTE this adm G1DD
44	2024-06-06	2024-06-10	4	78	2	2	1	0	0	0	1	0	0		Streptococcus mitis group	0	1	2024-06-06	2024-06-06	1	0	0	0	0	0	0	0	1	1	ceftriaxone	0	1	1	1	0				0					0	AML on chemo via PICC, neutropenic fever, source GI translocation vs oral mucositis, WAS TRANSF TO UPENN, CTX for 14 days, is on cephpodoxime ppx for her AML
45	2024-06-07	2024-06-13	6	71	1	2	1	0	1	0	0	0	0		Streptococcus gordonii	0	1	2024-06-07	2024-06-07	0	0	0	0	0	0	0	0	0	1	ceftriaxone	1	1	1	1	1	2024-06-10	0	0	1	2024-06-12	0	1	0	0	prosthetic aortic valve, mitral annuloplasty ring, TEE this adm showed mod MR
46	2024-06-12	2024-06-19	7	83	1	5	0	0	0	0	0	0	0		Streptococcus mitis group	0	1	2024-06-12	2024-06-12	1	0	0	0	1	0	0	0	0	1	ceftriaxone	1	1	1	1	1	2024-06-14	1	0	0					0	dental abscess, planned 4 wks tx w/ conclusive TTE , repeat echo in 6 wks after discharge
47	2024-06-17	2024-06-22	5	65	1	3	0	0	0	0	0	0	0		Streptococcus mitis group	0	1	2024-06-17	2024-06-17	1	0	0	0	0	0	1	0	0	1	ceftriaxone	0	0	1	1	1	2024-06-20	0	1	0					0	TTE this adm showed G2DD, mod conc LVH, only 14 days abx
48	2024-06-30	2024-07-10	10	55	2	2	1	0	0	0	1	0	0		Streptococcus constellatus	0	1	2024-06-30	2024-06-30	0	0	0	0	0	0	0	0	0	1	levofloxacin	0	1	0	1	1	2024-07-02	0	0	0					0	pancreas ca w/ chest port, source maybe superinfected tumor, only 14 days abx
49	2024-05-09	2024-05-14	5	58	1	3	0	0	0	0	0	0	1	sev MR	Streptococcus mutans	0	1	2024-05-09	2024-05-09	1	0	0	0	0	0	0	0	1	1	ceftriaxone gentamycin	0	1	1	1	1	2024-05-10	0	0	1	2024-05-13	1	0	1	0	source dental wound, had CVA likely 2/2 bact endocard, CT surgery consulted and gentamycin started based off TEE, transferred to Einstein
50	2024-04-29	2024-05-16	17	46	1	3	0	0	0	0	0	0	0		Streptococcus mitis group	0	1	2024-05-11	2024-05-11	1	0	0	1	0	0	1	0	0	1	vanc cefepime	0	1	0	0	0					0				1	patient w/ sev liver ca, bcx positve during stay in MICU, likely line related, but was made comfort
51	2024-05-16	2024-06-05	20	77	1	2	0	0	0	0	0	0	0		Streptococcus mitis group	0	1	2024-05-17	2024-05-17	1	0	0	0	0	0	0	0	1	1	vanc	1	1	0	0	1	2024-05-21	0	0	1	2024-05-22	0	0	0	1	ext hx AsAA repair complic by sternal wound infxn s/p I/D c flap reconstruct and prolong vanc , source periaortic supurative fluid from graft, abx were adjusted for CT surgery BUT NOT for IE managment
52	2024-05-21	2024-06-04	14	75	1	2	0	0	0	0	0	0	0		Streptococcus mitis group	0	1	2024-05-21	2024-05-21	0	0	0	0	0	0	0	0	0	1	ceftriaxone	0	0	1	1	1	2024-05-24	0	0	0					0	has lung ca w/ mets to spine, thought about 4wks abx but said if MRI neg for OM chances of endovas infxn are unlikely, went w/ 14 days abx
53	2024-05-29	2024-06-05	7	54	1	3	0	0	0	0	0	0	0		Streptococcus constellatus	0	1	2024-05-29	2024-05-29	1	0	0	0	0	1	0	0	0	1	amoxicillin clav	0	0	1	1	0				0					0	diverticulitis w/ bowel perf peritonitis, 14 days PO abx
54	2024-04-13	2024-05-08	25	78	2	2	0	0	0	0	0	0	0		Streptococcus anginosus	0	1	2024-04-13	2024-04-13	1	0	0	0	0	0	0	0	1	1	meropenem	1	1	0	0	1	2024-04-20	0	0	0					1	source odontogenic sinusitis w/ invasion to brain, cx positve in oral and brain, transferred to TJIH 4/15/24 for neurosx ICU, comfort care inpatient hospice 5/7/24
55	2024-04-27	2024-05-23	26	36	1	3	0	0	0	0	0	0	0		Streptococcus constellatus	0	1	2024-04-27	2024-04-27	1	0	0	0	1	1	0	0	0	1	ceftriaxone	1	1	1	0	1	2024-05-01	0	0	0					1	source liver abscess, fever on 5/3/24 day of liver drain,
56	2024-04-28	2024-05-03	5	95	2	2	0	0	0	0	0	0	0		Streptococcus mitis group	0	1	2024-04-28	2024-04-28	0	0	0	0	0	0	0	0	0	1	ceftriaxone	0	0	1	1	1	2024-05-02	0	0	0					0	thought to be contaminent, covid +
57	2024-03-05	2024-03-15	10	42	1	2	1	0	0	0	0	0	1	bicuspid AV and AS	Streptococcus gordonii	1	2	2024-03-05	2024-03-06	0	0	0	0	0	0	0	0	0	1	ceftriaxone	1	1	1	1	1	2024-03-06	1	1	1	2024-03-08	1	1	0	0	likely dental source, TTE found mod AR and sev AS G2DD, TEE (intraop w/ CT sx) showed same, decision to get CT sx involved after TTE NOT TEE 2/2 VERY CLASSIC picture of IE
58	2024-03-06	2024-04-03	28	37	2	2	0	0	0	0	0	0	0		Streptococcus anginosus	0	1	2024-03-06	2024-03-06	1	0	1	0	1	0	0	0	0	1	cefazolin levofloxacin	1	1	1	1	1	2024-03-08	0	0	0					1	paralyzed at baseline, source likely mult open wounds or spinal abscess, levofloxacin changed to PO
59	2024-03-08	2024-03-15	7	86	1	2	0	0	0	0	0	0	1	G1DD, mod AS	Streptococcus mutans	0	1	2024-03-08	2024-03-08	1	0	0	0	0	0	0	1	0	1	amoxicillin	0	0	1	1	1	2024-03-12	0	1	0					0	TTE found mod-sev MR, mod AS, mod TR
60	2024-03-18	2024-03-26	8	74	2	2	0	0	0	0	0	0	1	G1DD	Streptococcus mitis group	0	1	2024-03-18	2024-03-18	1	0	0	0	1	0	0	0	1	1	ceftriaxone	1	0	1	1	0				0					0	recent prosthetic R hip 2 wks ago, susp for infxn, ortho said no intervent, transferred to Temple for ortho reeval, they found abscess when I&D
61	2024-03-29	2024-04-01	3	74	1	2	0	0	0	0	0	0	0	bicuspid AV, mod MR, AS, AR, G1DD	Streptococcus sanguinis	0	1	2024-03-29	2024-03-29	0	0	0	0	0	0	0	0	0	0						0				0						was made comfort care the day of admis
62	2024-03-30	2024-04-05	6	73	2	2	1	0	1	0	0	0	1	mod MR, sev MS, prosthetic AV, mod TR	Streptococcus lutetiensis	0	1	2024-03-30	2024-03-30	1	0	0	0	0	1	0	0	0	1	cefazolin	0	0	1	1	0				0					0	source gallstone complications, ID said low susp for intravasc infxn, transitioned to PO abx, made comfort
63	2024-06-15	2024-06-24	9	87	2	5	0	0	0	0	0	0	0	G1DD	Enterococcus faecalis	1	2	2024-06-14	2024-06-15	1	0	0	0	0	0	0	1	0	1	amoxicillin	0	1	1	1	1	2024-06-19	0	0	0					0	was on ampicillin inpatient, switched to PO amox 500 TID for 14 days total tx
64	2024-06-16			55	2	2	1	0	0	1	0	0	1	HCM	Enterococcus faecalis	1	4	2024-06-26	2024-06-29	0	0	0	0	0	0	0	0	0	1	ceftriaxone ampicillin	1	1	1	1	1	2024-07-12	0	1						1	pacemaker ICD, brain infarct c/f septic emboli, TTE this adm shows mod-sev MR w/ LA sev dilation, PLANNED TEE and ICD removal when stable
65	2024-06-26	2024-07-11	15	86	2	2	1	0	0	1	0	0	0		Enterococcus faecalis	0	1	2024-06-28	2024-06-28	1	0	0	0	0	0	0	1	0	1	amoxicillin	0	1	1	1	1	2024-07-01	0	1	0					0	TTE this adm showed mod TR, transitioned abx to PO amox
66	2024-05-10	2024-05-15	5	80	2	3	1	0	0	0	1	0	0		Enterococcus faecalis	1	2	2024-05-10	2024-05-11	1	0	0	1	0	0	0	0	0	1	vanc cefepime flagyl	0	0	1	1	0				0					0	dialysis line source, made comfort
67	2024-05-09	2024-05-16	7	77	2	5	0	0	0	0	1	0	1	G1DD	Vancomycin resistant Enterococcus faecalis	1	4	2024-05-09	2024-05-16	1	0	0	1	0	1	0	0	0	1	Daptomycin	1	0	1	0	1	2024-05-13	0	0	0					1	dialysis line or intrabdominal source, coded and made comfort
68	2024-05-13	2024-06-01	19	81	1	2	1	0	0	1	0	0	1	HFrEF	Enterococcus faecalis	1	2	2024-05-13	2024-05-14	1	0	0	0	0	1	0	0	0	1	ceftriaxone ampicillin	1	1	1	1	1	2024-05-17	0	1	0					0	TTE this adm showed mod MR, source maybe gut translocation from GI cancer, no TEE b/c not candidate for surgery
69	2024-03-30	2024-04-05	6	87	2	3	1	0	0	1	0	0	1	G1DD, mod TR	Enterococcus faecalis	1	3	2024-03-31	2024-04-02	0	0	0	0	0	0	0	0	0	1	piperacillin tazo	1	0	1	1	1	2024-04-01	0	1	0					0	TTE this adm showed mod-sev MR TR, no TEE b/c not candidate for sx, made comfort
70	2024-04-16	2024-04-21	5	47	1	2	1	1	0	0	0	0	1	sev TR	Enterococcus faecalis	1	4	2024-04-16	2024-04-21	1	0	1	0	0	0	0	0	0	1	ceftriaxone ampicillin	1	1	1	1	1	2024-04-18	1	0	0					0	IVDU, left AMA
71	2024-04-16	2024-05-30	44	54	1	2	1	0	0	0	1	0	0		Enterococcus faecalis	1	5	2024-04-16	2024-04-19	1	0	0	1	0	0	0	0	0	1	ceftriaxone ampicillin	1	1	1	1	1	2024-04-19	0	0	0					1	also had fungemia tx w/ micafungin, no TEE not a surgical candidate
72	2024-04-27	2024-05-07	10	82	1	2	1	0	0	0	0	0	1	mod AS	Enterococcus faecalis	0	1	2024-04-29	2024-04-29	1	0	0	0	0	0	0	1	0	1	ampicillin	0	1	1	1	1	2024-04-29	0	1	0					0	TTE this adm takosubo CM w/ G1DD, didnt seem to care about the entoroccocus
73	2024-03-24	2024-04-06	13	54	2	2	0	0	0	0	0	0	0		Enterococcus faecalis	1	6	2024-03-24	2024-03-29	1	0	0	0	0	0	0	1	0	1	linezolid	0	1	0	1	1	2024-03-29	0	0	1	2024-04-01	0	0	1	0	changed to oral linezolid until 4/7/24 for tx completion, source UTI and had underlying malignancy
74	2024-05-21	2024-05-31	10	71	2	2	1	0	0	0	1	0	1	mod TR, G1DD	Vancomycin resistant Enterococcus faecalis	0	1	2024-05-21	2024-05-21	1	0	0	1	0	0	0	0	0	1	Daptomycin	1	0	1	1	1	2024-05-24	0	0	0					0	has PICC in from prev adm 4/24-5/10, PICC removed this adm and replaced, dapto replaced nafcillin
75	2024-04-16	2024-05-30	44	54	1	2	1	0	0	0	1	0	0		Enterococcus faecalis	1	5	2024-04-16	2024-04-19	1	0	0	1	0	1	0	0	0	1	ceftriaxone ampicillin	1	1	1	1	1	2024-04-19	0	0	0					0	souce poss from PICC or GI, had multiple bugs growing including fungemia, PICC removed and replaced
76	2024-06-01	2024-06-06	5	69	1	2	1	0	0	0	1	0	0		Staphylococcus epidermidis	0	1	2024-06-01	2024-06-01	0	0	0	0	0	0	0	0	0	1	levofloxacin	0	1	1	1	0				0					0	likely contaminent, on chemo via chest port for prostate ca
77	2024-06-02	2024-06-03	1	63	2	2	1	0	0	0	1	0	1	mod TR	Staphylococcus epidermidis	0	1	2024-06-02	2024-06-02	1	0	1	1	0	0	0	0	0	1	vanc cefepime	0	1	1		0				0					0	source cellulitis? PICC had erythema (TPN), transferred to Upenn
78	2024-06-04	2024-06-14	10	53	1	2	0	0	0	0	0	0	0		Staphylococcus epidermidis	0	1	2024-06-04	2024-06-04	0	0	0	0	0	0	0	0	0	1	vanc cefepime	0	0	1	1	0				0					0	likely contaminent, ED abx use
79	2024-06-06	2024-07-04	28	73	2	2	0	0	0	0	0	0	0		Staphylococcus saccarolyticus	0	1	2024-06-06	2024-06-06	1	0	0	0	0	0	0	0	1	1	vanc	0	0	1	0	1	2024-06-10	0	1	0					1	source maybe vasc graft for RLE ischemia, TTE this adm showed sev dec LV fxn 25-30% and Takosubo
80	2024-06-06	2024-06-14	8	69	1	2	1	0	0	0	0	0	1	G1DD	Staphylococcus pettenkoferi	0	1	2024-06-06	2024-06-06	0	0	0	0	0	0	0	0	0	1	ampicillin sulb	0	1	0	1	0				0					0	likely contaminent, central fever possibly 2 days after adm from strok prob
81	2024-06-10	2024-06-14	4	63	2	2	0	0	0	0	0	0	0		Staphylococcus epidermidis	0	1	2024-06-10	2024-06-10	0	0	0	0	0	0	0	0	0	1	vanc cefepime	0	0	1	1	0				0					0	likely contaminent, presented w/ sepsis pressure wound
82	2024-06-11	2024-06-21	10	76	2	2	0	0	0	0	0	0	0		Staphylococcus epidermidis	0	1	2024-06-11	2024-06-11	0	0	0	0	0	0	0	0	0	1	cefazolin ampicillin sulb	0	0	1	1	1	2024-06-12	0	0	0					0	contaminent, TTE not used for IE but for afib
83	2024-06-11	2024-06-20	9	80	1	3	1	0	0	0	1	0	1	G3DD	Staphylococcus pettenkoferi	0	1	2024-06-11	2024-06-11	1	0	0	1	0	0	0	0	0	1	vanc	0	0	1	1	1	2024-06-14	0	1	0					0	has midline cath, removed 6/14, TTE this adm showed mod MR, TR
84	2024-06-12	2024-06-20	8	81	1	3	0	0	0	0	0	0	0		Staphylococcus epidermidis	0	1	2024-06-12	2024-06-12	0	0	0	0	0	0	0	0	0	1	vanc cefepime	0	0	1	1	1	2024-06-13	0	0	0					1	contam, shock 2/2 poor PO intake momentarily, made comfort
85	2024-06-14	2024-06-25	11	59	1	3	0	0	0	0	0	0	0		Staphylococcus epidermidis	1	3	2024-06-14	2024-06-17	1	1	1	0	0	0	0	0	0	1	cefazolin	1	1	1	1	1	2024-06-18	0	0	1	2024-06-20	0	0	0	0
86	2024-06-17	2024-07-02	15	69	2	2	1	0	0	1	0	0	0		Staphylococcus hominis	0	1	2024-06-17	2024-06-17	0	0	0	0	0	0	0	0	0	1	cefazolin gentamycin rifampin	0	1	1	1	0				1	2024-06-19	0	0	0	0	went right to TEE, abx tx for presumed MSSE CIED endocarditis
87	2024-06-17	2024-06-19	2	87	2	2	0	0	0	0	0	0	0		Staphylococcus epidermidis	0	1	2024-06-17	2024-06-17	0	0	0	0	0	0	0	0	0	0		0	0	1	0	0				0					0	found to have lung ca, refused abx, home hospice
88	2024-06-18	2024-06-19	1	80	2	2	0	0	0	0	0	0	0		Staphylococcus epidermidis	0	1	2024-06-18	2024-06-18	0	0	0	0	0	0	0	0	0	0		0	0	1	1	0				0					0	quickly seen and eval by gyn/onc and said can be followed otpt, bcx never addressed
89	2024-06-20	2024-06-23	3	77	2	3	0	0	0	0	0	0	0		Staphylococcus epidermidis	0	1	2024-06-20	2024-06-20	0	0	0	0	0	0	0	0	0	0		0	1	1	1	0				0					0	contam, had covid, no abx, pos bcx never addressed
90	2024-06-21	2024-06-27	6	58	2	2	0	0	0	0	0	0	1	mod MS	Staphylococcus epidermidis	0	1	2024-06-21	2024-06-21	0	0	0	0	0	0	0	0	0	1	ceftriaxone	0	0	1	0	1	2024-06-24	0	0	0					0	contam, tx for UTI, stroke may explain WBC, made comfort
91	2024-06-22	2024-06-23	1	86	2	2	0	0	0	0	0	0	0		Staphylococcus epidermidis	0	1	2024-06-22	2024-06-22	0	0	0	0	0	0	0	0	0	0		0	0	1	0	0				0					0	contam, instantly made comfort
92	2024-06-28	2024-06-28	0	89	1	3	1	0	0	0	0	0	1	G1DD	Staphylococcus epidermidis	0	1	2024-06-28	2024-06-28	0	0	0	0	0	0	0	0	0	0		0	0	0	0	0				0					0	immediately code blue in the ED
93	2024-06-28	2024-07-12	14	68	2	2	1	0	0	0	0	0	1	G1DD	Staphylococcus epidermidis	0	1	2024-06-28	2024-06-28	0	0	0	0	0	0	0	0	0	1	cefazolin	0	0	1	1	1	2024-07-03	0	1	0					0	contam, TTE found G2DD
94	2024-05-02	2024-05-09	7	84	1	3	0	0	0	0	0	0	0		Staphylococcus epidermidis	0	1	2024-05-02	2024-05-02	0	0	0	0	0	0	0	0	0	1	vanc cefepime	0	0	1	1	0				0					0	contam
95	2024-04-29	2024-05-20	21	72	2	2	0	0	0	0	0	0	0		Staphylococcus epidermidis	0	1	2024-05-05	2004-05-05	0	0	0	0	0	0	0	0	0	1	vanc	0	1	1	1	1	2024-05-07	0	1	0					0	contam, TTE showed HFrEF
96	2024-05-06	2024-05-09	3	72	2	5	0	0	0	0	0	0	0		Staphylococcus epidermidis	0	1	2024-05-06	2024-05-06	0	0	0	0	0	0	0	0	0	1	vanc	0	0	1	1	0				0					0	contam
97	2024-05-06	2024-05-10	4	42	1	2	0	0	0	0	0	0	0		Staphylococcus epidermidis	0	1	2024-05-06	2024-05-06	0	0	0	0	0	0	0	0	0	1	vanc cefepime	0	0	1	1	0				0					0	contam
98	2024-05-07	2024-05-24	17	57	1	2	0	0	0	0	0	0	0		Staphylococcus capitis	0	1	2024-05-07	2024-05-07	0	0	0	0	0	0	0	0	0	1	ertapenenm	1	1	0	0	1	2024-05-20	0	0	0					0	contam, found to have liver abscess but not the source, tx 6 wks for abscess NOT IE
99	2024-05-09	2024-05-31	22	57	2	2	0	0	0	0	0	0	0		Staphylococcus epidermidis	0	1	2024-05-09	2024-05-09	0	0	0	0	0	0	0	0	0	1	vanc	0	1	0	1	1	2024-05-15	0	0	0					1	contam
100	2024-05-09	2024-05-13	4	74	1	2	0	0	0	0	0	0	0		Staphylococcus epidermidis	0	1	2024-05-09	2024-05-09	0	0	0	0	0	0	0	0	0	0		0	0	1	1	0				0					0	contam
101	2024-05-11	2024-05-15	4	90	2	2	1	0	1	0	0	0	1	sev AS s/p TAVR, G2DD	Staphylococcus epidermidis	0	1	2024-05-11	2024-05-11	0	0	0	0	0	0	0	0	0	0		0	0	1	1	1	2024-05-15	0	1	0					0	contam, TTE this adm showed mod MR
102	2024-05-11	2024-05-14	3	83	1	2	1	0	0	0	0	0	1	G3DD	Staphylococcus epidermidis	0	1	2024-05-11	2024-05-11	0	0	0	0	0	0	0	0	0	1	vanc	0	0	1	1	1	2024-05-14	0	0	0					0	contam
103	2024-05-13	2024-05-24	11	62	2	2	0	0	0	0	0	0	0		Staphylococcus epidermidis	0	1	2024-05-13	2024-05-13	0	0	0	0	0	0	0	0	0	1	vanc	0	0	1	1	0				0					0	contam
104	2024-05-13	2024-05-18	5	94	2	2	0	0	0	0	0	0	0		Staphylococcus epidermidis	0	1	2024-05-13	2024-05-13	0	0	0	0	0	0	0	0	0	1	ceftriaxone	0	0	1	1	1	2024-05-14	0	0	0					0	contam
105	2024-05-15	2024-05-18	3	79	1	4	1	0	0	0	0	0	1	HFrEF, mod MR	Staphylococcus hominis	0	1	2024-05-15	2024-05-15	0	0	0	0	0	0	0	0	0	1	vanc ceftriaxone	0	0	1	1	1	2024-05-17	0	0	0					0	contam
106	2024-05-18	2024-05-27	9	45	2	2	0	0	0	0	0	0	0		Staphylococcus haemolyticus	0	1	2024-05-18	2024-05-18	0	0	0	0	0	0	0	0	0	1	vanc	0	0	1	1	0				0					0	contam
107	2024-05-21	2024-05-28	7	75	1	2	0	0	0	0	0	0	0		Staphylococcus epidermidis	0	1	2024-05-21	2024-05-21	0	0	0	0	0	0	0	0	0	1	ceftriaxone	0	0	1	1	1	2024-05-28	0	0	0					0	contam
108	2024-05-22	2024-05-27	5	90	1	2	1	0	0	0	0	0	1	mod TR, sev biatrial enlarge	Staphylococcus epidermidis	1	2	2024-05-22	2024-05-22	0	0	0	0	0	0	0	0	0	1	cefepime	0	0	1	1	1	2024-05-24	0	0	0					0	contam
109	2024-05-23	2024-06-01	9	88	1	3	0	0	0	0	0	0	0		Staphylococcus pettenkoferi	0	1	2024-05-24	2024-05-24	0	0	0	0	0	0	0	0	0	1	vanc cefepime	0	0	1	1	0				0					0	contam
110	2024-05-26	2024-05-30	4	96	2	2	0	0	0	0	0	0	0		Staphylococcus capitis	0	1	2024-05-26	2024-05-26	0	0	0	0	0	0	0	0	0	1	vanc	0	0	1	1	0				0					0	contam
111	2024-05-27	2024-06-02	6	75	2	3	1	0	0	0	0	0	1	HFrEF, sev thickened MV AV	Staphylococcus epidermidis	0	1	2024-05-27	2024-05-27	0	0	0	0	0	0	0	0	0	1	vanc	0	0	1	1	1	2024-05-28	0	1	0					1	contam, TTE for ACS this adm showed mod MS MR, severe AS
112	2024-05-27	2024-06-10	14	72	1	2	0	0	0	0	0	0	0		Staphylococcus hominis	0	1	2024-05-27	2024-05-27	0	0	0	0	0	0	0	0	0	1	vanc	0	0	1	1	0				0					0	contam
113	2024-05-30	2024-05-31	1	39	1	3	0	0	0	0	0	0	0		Staphylococcus epidermidis	0	1	2024-05-30	2024-05-30	0	0	0	0	0	0	0	0	0	1	ceftriaxone	0	0	1	1	0				0					0	contam
114	2024-04-02	2024-04-10	8	90	2	2	1	0	0	1	0	0	1	mod MR	Staphylococcus epidermidis	0	1	2024-04-02	2024-04-02	0	0	0	0	0	0	0	0	0	1	ampicillin sulb	0	0	1	1	0				0					0	contam
115	2024-04-03	2024-04-07	4	92	2	2	0	0	0	0	0	0	0		Staphylococcus epidermidis	0	1	2024-04-03	2024-04-03	0	0	0	0	0	0	0	0	0	1	vanc cefepime	0	0	1	1	0				0					0	contam
116	2024-04-08	2024-07-15	98	51	1	2	1	0	0	0	1	0	1	HFrEF	Staphylococcus epidermidis	0	1	2024-04-08	2024-04-08	1	0	0	1	0	0	0	0	0	1	cefazolin	0	0	1	1	1	2024-04-09	0	0	0					1	contam, PICC for TPN that was NOT removed this adm, was growing fungemia way later in the adm
117	2024-04-10	2024-04-12	2	32	1	2	0	0	0	0	0	0	0		Staphylococcus epidermidis	0	1	2024-04-10	2024-04-10	0	0	0	0	0	0	0	0	0	0		0	0	1	1	0				0					0	contam
118	2024-04-10	2024-04-10	0	79	1	2	1	0	0	0	0	0	1	HFrEF	Staphylococcus epidermidis	0	1	2024-04-10	2024-04-10	0	0	0	0	0	0	0	0	0	0		0	0	1	1	0				0					0	died immediatley on admission
119	2024-04-13	2024-04-19	6	81	2	2	0	0	0	0	0	0	1	G1DD	Staphylococcus epidermidis	0	1	2024-04-13	2024-04-13	1	0	0	0	0	0	0	1	0	1	vanc	0	0	1	1	1	2024-04-17	0	0	0					0	Ucx also grew s.epi
120	2024-04-14	2024-04-30	16	66	1	2	0	0	0	0	0	0	0		Staphylococcus haemolyticus	1	2	2024-04-14	2024-04-15	0	0	0	0	0	0	0	0	0	1	vanc	0	1	1	1	1	2024-04-19	0	0	0					0	contam
121	2024-04-16	2024-04-19	3	79	1	2	1	0	1	0	0	0	1	G1DD, s/p TAVR	Staphylococcus epidermidis	0	1	2024-04-16	2024-04-16	0	0	0	0	0	0	0	0	0	1	ceftriaxone	0	0	1	1	1	2024-04-18	0	0	0					0	contam
122	2024-04-16	2024-04-30	14	78	2	2	1	0	1	0	0	0	1	G2DD, s/p TAVR	Staphylococcus epidermidis	1	4	2024-04-16	2024-04-22	0	0	0	0	0	0	0	0	0	1	vanc	1	1	1	1	1	2024-04-17	0	1	1	2024-04-22	1	1	0	0	TEE this adm showed mod-sev MR, they did x2 more TTE's after TEE to assess clinically, consulted CT sx but they rec IV abx
123	2024-03-14	2024-05-08	55	38	1	2	0	0	0	0	0	0	0		Staphylococcus epidermidis	0	1	2024-04-18	2024-04-18	0	0	0	0	0	0	0	0	0	1	vanc	0	1	1	1	0				0					1	contam, TTE done before positve bcx due to shock and PE, level 1 trauma
124	2024-04-20	2024-04-26	6	86	2	2	0	0	0	0	0	0	0		Staphylococcus hominis	0	1	2024-04-20	2024-04-20	0	0	0	0	0	0	0	0	0	1	vanc	0	1	1	1	0				0					0	contam
125	2024-04-23	2024-05-01	8	58	2	2	1	0	0	0	0	0	1	G1DD, mod TR	Staphylococcus haemolyticus	0	1	2024-04-23	2024-04-23	0	0	0	0	0	0	0	0	0	1	vanc	0	0	1	1	0				0					0	contam
126	2024-04-24	2024-04-30	6	28	1	2	0	0	0	0	0	0	0		Staphylococcus capitis	0	1	2024-04-24	2024-04-24	0	0	0	0	0	0	0	0	0	1	vanc	0	0	1	1	0				0					0	contam
127	2024-04-25	2024-05-19	24	89	2	3	0	0	0	0	0	0	0		Staphylococcus hominis	0	1	2024-04-25	2024-04-25	0	0	0	0	0	0	0	0	0	1	cefepime	0	0	1	1	1	2024-05-07	0	1	0					0	contam, TTE this adm G2DD
128	2024-04-26	2024-05-17	21	88	2	2	1	0	0	1	0	0	1	mod TR	Staphylococcus epidermidis	0	1	2024-04-26	2024-04-26	0	0	0	0	0	0	0	0	0	1	vanc meropenem	0	0	1	0	1	2024-05-07	0	1	0					0	contam
129	2024-04-27	2024-05-01	4	43	2	2	1	0	0	0	0	0	1	MVP s/p repair	Staphylococcus capitis	0	1	2024-04-27	2024-04-27	0	0	0	0	0	0	0	0	0	1	vanc	0	0	1	1	1	2024-04-29	0	0	0					0	contam
130	2024-04-30	2024-05-07	7	92	1	2	0	0	0	0	0	0	0		Staphylococcus capitis	0	1	2024-04-30	2024-04-30	0	0	0	0	0	0	0	0	0	1	vanc cefepime	0	0	1	1	0				0					0	contam, hospice
131	2024-03-01	2024-03-08	7	82	2	2	0	0	0	0	0	0	0		Staphylococcus capitis	0	1	2024-03-01	2024-03-01	0	0	0	0	0	0	0	0	0	1	ceftriaxone	0	0	1	1	0				0					0	contam, hospice
132	2024-03-02	2024-03-09	7	44	2	3	1	0	0	0	1	0	0		Staphylococcus hominis	0	1	2024-03-02	2024-03-02	0	0	0	0	0	0	0	0	0	1	vanc	0	1	1	1	0				0					0	contam, had chest port for chemo for breast ca
133	2024-03-03	2024-03-14	11	65	1	2	0	0	0	0	0	0	0		Staphylococcus epidermidis	0	1	2024-03-03	2024-03-03	0	0	0	0	0	0	0	0	0	1	doxycycline	0	0	1	1	1	2024-03-06	0	0	0					0	contam
134	2024-03-03	2024-03-07	4	77	2	3	0	0	0	0	0	0	0		Staphylococcus capitis	0	1	2024-03-03	2024-03-03	0	0	0	0	0	0	0	0	0	1	vanc	0	1	1	1	1	2024-03-06	0	0	0					0	contam
135	2024-03-05	2024-03-12	7	70	1	2	0	0	0	0	0	0	0		Staphylococcus epidermidis	0	1	2024-03-05	2024-03-05	0	0	0	0	0	0	0	0	0	1	vanc cefepime	0	0	1	1	1	2024-03-11	0	1	0					0	contam, TTE this adm mod TR
136	2024-03-06	2024-03-09	3	70	1	3	0	0	0	0	0	0	0		Staphylococcus hominis	0	1	2024-03-06	2024-03-06	0	0	0	0	0	0	0	0	0	1	ceftriaxone	0	0	1	1	0				0					0	contam, covid positve
137	2024-03-08	2024-03-11	3	75	1	3	1	0	0	0	0	0	1	G1DD	Staphylococcus hominis	0	1	2024-03-08	2024-03-08	0	0	0	0	0	0	0	0	0	1	ceftriaxone	0	0	1	1	1	2024-03-10	0	1	0					0	contam, TTE done for pericardial effusion which is new
138	2024-03-08	2024-03-11	3	60	2	3	0	0	0	0	0	0	0		Staphylococcus hominis	0	1	2024-03-08	2024-03-08	0	0	0	0	0	0	0	0	0	1	ceftriaxone	0	0	1	1	0				0					0	contam
139	2024-03-10	2024-03-22	12	71	1	2	1	0	0	0	1	0	0		Staphylococcus epidermidis	0	1	2024-03-10	2024-03-10	1	0	0	1	0	0	0	0	0	1	linezolid levofloxacin	0	1	1	1	1	2024-03-11	0	0	0					0	poss PICC source
140	2024-03-11	2024-03-16	5	80	2	2	1	0	0	0	0	0	1	G1DD	Staphylococcus hominis	0	1	2024-03-11	2024-03-11	0	0	0	0	0	0	0	0	0	1	cefuroxime	0	1	1	0	1	2024-03-15	0	0	0					0	contam
141	2024-03-11	2024-03-19	8	61	1	3	0	0	0	0	0	0	0		Staphylococcus hominis	0	1	2024-03-11	2024-03-11	0	0	0	0	0	0	0	0	0	1	cefepime	0	1	1	1	1	2024-03-13	0	0	0					0	contam
142	2024-03-14	2024-03-26	12	54	1	2	1	0	0	0	1	0	0		Staphylococcus epidermidis	0	1	2024-03-14	2024-03-14	1	0	0	1	0	0	0	0	0	1	daptomycin	0	1	1	1	1	2024-03-19	0	0	0					0	poss PICC source, removed and replaced
143	2024-03-14	2024-03-27	13	74	1	2	0	0	0	0	0	0	0		Staphylococcus epidermidis	0	1	2024-03-14	2024-03-14	0	0	0	0	0	0	0	0	0	1	vanc cefepime	0	0	1	0	0				0					0	contam
144	2024-03-16	2024-03-19	3	53	1	5	0	0	0	0	0	0	0		Staphylococcus epidermidis	0	1	2024-03-16	2024-03-16	0	0	0	0	0	0	0	0	0	1	ceftriaxone	0	0	1	1	0				0					0	contam
145	2024-03-17	2024-03-25	8	23	2	2	0	0	0	0	0	0	0		Staphylococcus epidermidis	0	1	2024-03-17	2024-03-17	0	0	0	0	0	0	0	0	0	1	vanc	0	1	0	1	1	2024-03-22	0	0	0					0	contam
146	2024-03-12	2024-04-19	38	41	1	3	1	0	0	0	1	0	0		Staphylococcus epidermidis	0	1	2024-03-19	2024-03-19	1	0	0	1	0	0	0	0	0	1	vanc	1	1	1	1	1	2024-03-21	0	0	0					0	source likely chemoport c/b nosocomial infx
147	2024-03-21	2024-03-26	5	73	2	2	1	0	0	0	1	0	0		Staphylococcus hominis	0	1	2024-03-21	2024-03-21	0	0	0	0	0	0	0	0	0	1	vanc cefepime	0	1	1	1	0				0					0	contam, has chestport for chemo
148	2024-03-27	2024-04-05	9	59	2	2	0	0	0	0	0	0	0		Staphylococcus epidermidis	0	1	2024-03-27	2024-03-27	0	0	0	0	0	0	0	0	0	1	ceftriaxone	0	1	1	1	0				0					0	contam

## Sheet: RAW Gen Analysis
Subject #	Admission Date	Discharge Date	LOS	Age	Sex	Race	Comorbidity present (at least 1)?	IVDU	Prosthetic Valve	Intracardiac device	Chronic in-line cath	Previous IE	Cardio-structural abnormality	Type of abnormality	Bcx initial	Bcx repeat positive?	Total sets of positive Bcx	Date initial positive Bcx	Date last positive Bcx	Days bcx positive	Alternative source of infx?	OM?	Cellulitis or open wound?	Line related?	Abscess?	Intra-abdominal?	PNA?	UTI?	Other	Abx used?	Abx tx? (ended w/)	Planned longterm abx tx (~4-6wks) +/- PICC?	fever?	< 3 days defervescence or remained afebrile?	WBC downtrend or remained nrml?	TTE used?	TTE date	TTE new valvular veg?	TTE new worsened fxnl findings from previous TTEs?	TEE used?	TEE date	TEE new valvular veg?	TEE new anatomical/fxnl findings?	Abx/tx changed based off TEE?	Pt required ICU level of care?	Comments
1	2024-05-30	2024-06-19	20	85	1	2	1	0	1	1	0	0	1	mod TR, MR, AS w/ TAVR, CABG 2000	Methicillin-Resistant Staphylococcus aureus	1	11	2024-05-30	2024-06-12	13	0	0	0	0	0	0	0	0	0	1	Daptomycin	1	0	1	1	1	2024-05-31	0	0	1	2024-06-03	0	0	0	0	NEVER febrile, TTE prev was BEFORE CABG
2	2024-06-03			78	1	3	0	0	0	0	0	0	0		Methicillin-Resistant Staphylococcus aureus	1	6	2024-06-03	2024-06-07	4	1	1	0	0	0	0	0	0	0	1	Daptomycin	1	1	1	1	1	2024-06-05	0	0	0					1	OM L foot, TEE denied by cards, SICU
3	2024-06-05	2024-06-22	17	62	1	2	1	0	0	0	0	0	1	thickened AV leaf	Staphylococcus aureus	1	5	2024-06-05	2024-06-11	6	0	0	0	0	0	0	0	0	1	1	Ertapenem nafcillin	0	1	0	1	1	2024-06-05	0	0	1	2024-06-12	0	1	0	1	MICU, was on ertapenem, nafcillin, clindamycin early on, source septic arthritis R knee aspiration, TTE this adm showed mod-sev AR
4	2024-06-06	2024-06-12	6	77	1	2	0	0	0	0	0	0	0		Staphylococcus aureus	1	2	2024-06-06	2024-06-07	1	1	0	0	0	0	0	0	1	1	1	cefazolin	0	1	1	1	1	2024-06-07	0	0	1	2024-06-10	0	0	0	0	infected kidney stone
5	2024-06-10	2024-06-13	3	71	1	2	1	0	0	0	1	1	1	G3DD, sev LA dilation	Staphylococcus aureus	1	2	2024-06-10	2024-06-11	1	1	0	0	0	1	0	0	0	0	1	vanc zosyn	1	1	1	0	1	2024-06-11	1	1	0					1	prev IE on Mitral valve, TTE this adm show mod MR, tx w/ PICC, chole and psoas abscess, MICU
6	2024-06-11	2024-06-22	11	81	1	2	1	0	0	0	0	0	1	mod MR, TR, sev biatrial enlarge	Staphylococcus aureus	1	4	2024-06-11	2024-06-15	4	1	0	1	0	0	1	0	0	0	1	Ertapenem cefazolin	0	1	1	0	1	2024-06-12	0	0	0					1	MICU
7	2024-06-10	2024-07-12	32	45	2	2	0	0	0	0	0	0	0		Staphylococcus aureus	0	1	2024-06-12	2024-06-12	0	0	0	0	0	0	0	0	0	0	1	cefazolin	1	0	1	1	1	2024-06-14	0	0	0					1	MICU
8	2024-06-13	2024-06-23	10	60	1	3	1	0	0	0	0	0	1	G2DD	Staphylococcus aureus	1	2	2024-06-13	2024-06-14	1	1	0	0	0	1	0	0	0	0	1	cefazolin	1	1	1	1	1	2024-06-14	0	0	0					0
9	2024-06-15	2024-06-27	12	64	2	2	1	0	0	0	1	0	0		Staphylococcus aureus	1	2	2024-06-20	2024-06-21	1	1	0	1	0	0	0	0	0	0	1	cefazolin	1	1	1	1	1	2024-06-24	0	0	0					0	chest port for Br ca w/ brain mets, port negative as source, RUE cellulitis, planned 6wks abx but made comfort
10	2024-06-25	2024-07-02	7	46	1	2	1	1	0	0	1	1	1	1/4/24 veg seen, sev TR,	Methicillin-Resistant Staphylococcus aureus	1	5	2024-06-25	2024-06-30	5	1	1	1	0	1	0	0	0	0	1	Daptomycin	1	1	1	1	1	2024-06-25	1	1	0					0	recurring IE w/ mult adm, been in ICU, prior veg 1/24, bad IVDU not even candidate for PICC, this adm it was NOT due to line related, left AMA, not candidate for CT surgery, TTE this adm showed increased RV dilation and sev pulm HTN
11	2024-06-27	2024-07-28	31	74	1	2	1	0	0	0	0	0	1	sev calc AV, mod AS, mod TR	Staphylococcus aureus	0	1	2024-06-27	2024-06-27	0	1	0	1	0	0	0	1	0	0	1	vanc cefepime	0	1	1	0	1	2024-06-28	0	1	0					1	wbc confound by new L pyelo, hx of bladdar ca (no chemo), pulm nodule, TTE now shows mod-sev AS, G2DD, biatrial enlarge, MICU
12	2024-05-01	2024-05-11	10	70	1	5	1	0	0	0	1	0	1	G1DD	Staphylococcus aureus	1	2	2024-05-01	2024-05-03	2	1	0	0	1	0	0	0	0	0	1	cefazolin	1	1	1	1	1	2024-05-07	0	1	0					0	ESRD HD MWF, has dialysis cath which was source, suprapub cath, TTE this adm shows significant MR
13	2024-05-02	2024-05-24	22	91	2	2	1	0	0	0	0	0	1	HFrEF	Staphylococcus aureus	1	2	2024-05-02	2024-05-03	1	1	0	0	0	1	0	0	0	0	1	cefazolin	1	1	1	1	1	2024-05-06	0	0	0					0	had recent spinal fusion T8-12 4/2024, spine abscess, IR declined intervent, 8 wks abx maybe lifelong given infxn of hardware
14	2024-05-07	2024-05-08	1	79	2	2	0	0	0	0	0	0	0		Staphylococcus aureus	0	1	2024-05-07	2024-05-07	0	1	0	0	0	0	1	0	0	0	0						0									0	patient made comfort day of admission, lung ca w/ bone and brain mets
15	2024-05-07	2024-05-21	14	71	2	2	1	0	0	0	1	0	0		Staphylococcus aureus	1	3	2024-05-07	2024-05-10	3	1	0	1	1	0	0	0	0	0	1	cefazolin	1	1	0	1	1	2024-05-08	0	0	0					0	lung ca on chemo, chest port tip also growing MSSA, no TEE 2/2 thrombocytopenia
16	2024-05-08	2024-05-20	12	77	1	2	1	0	0	0	0	0	1	at least mod TR'	Staphylococcus aureus	0	1	2024-05-08	2024-05-08	0	1	0	0	0	1	0	0	1	0	1	cefazolin	1	1	1	1	1	2024-05-09	0	0	1	2024-05-13	0	0	0	0	L hip septic arthritis s/p girdlestone, UTI hx of freq straight cath, resolved findings of TR on TTE
17	2024-05-08	2024-05-23	15	83	2	2	1	0	0	0	0	0	1	PFO, sev biatrial enlarge, G1DD, mod LVH	Staphylococcus aureus	1	3	2024-05-17	2024-05-19	2	0	0	0	0	0	0	0	0	0	1	nafcillin	1	1	1	1	1	2024-05-20	0	0	0					1	bcx positive 10 days into admission, poss in line assc, had 1 TTE prior to pos bcx 5/9/24 and another after, MICU
18	2024-05-26	2024-06-15	20	59	1	3	1	0	0	0	0	0	1	G1DD, mod mitral annular calc	Staphylococcus aureus	1	2	2024-05-28	2024-05-29	1	1	0	1	0	0	0	0	0	0	1	cefazolin	1	1	1	1	1	2024-05-30	1	0	0					0	severely thickened calc mitral valve on admss TTE, CKD5 not on HD but has LUE AV fist w/ recent angioplasty, chronic L toe wound, amputated, PLANNED TEE AFTER ABX
19	2024-04-03	2024-04-13	10	51	1	3	0	0	0	0	0	0	0		Staphylococcus aureus	1	3	2024-04-03	2024-04-06	3	1	1	0	0	0	0	0	0	0	1	cefazolin	1	1	1	1	1	2024-04-05	0	0	1	2024-04-09	0	0	0	0	ESRD on HD right AV fistula, R foot OM
20	2024-04-10	2024-04-11	1	71	1	2	1	0	0	0	1	0	1	HFrEF,mod MR, sev global hypokinesia	Methicillin-Resistant Staphylococcus aureus	0	1	2024-04-11	2024-04-11	0	1	0	1	1	0	0	0	0	0	1	vanc cefepime	0	0	1		0									1	HF on milrinone via PICC, coded shortly after transfer to MICU
21	2024-04-11	2024-04-16	5	65	2	2	1	0	0	0	0	0	1	thickened AV leaf	Methicillin-Resistant Staphylococcus aureus	1	3	2024-04-11	2024-04-12	1	0	0	0	0	0	0	0	0	1	1	Daptomycin	1	0	1	1	1	2024-04-12	0	1	0					0	septic thrombus in RA, TTE echodensity c/f clot in transit and mild-mod TR, mod TR, was made comfort
22	2024-04-13	2024-04-14	1	88	2	2	0	0	0	0	0	0	0		Staphylococcus aureus	0	1	2024-04-13	2024-04-13	0	1	0	0	0	0	0	1	0	0	1	vanc cefepime	0	0	0		0										septic shock 2/2 PNA, made comfort care
23	2024-04-10	2024-04-19	9	85	1	2	0	0	0	0	0	0	0		Staphylococcus aureus	1	2	2024-04-14	2024-04-14	0	0	0	0	0	0	0	0	0	0	1	cefazolin	1	1	1	1	1	2024-04-18	0	0	0					0	4 week abx course w/ lack of acute findings
24	2024-04-18	2024-04-26	8	85	2	2	1	0	0	0	0	0	1	G1DD	Staphylococcus aureus	1	3	2024-04-18	2024-04-20	2	1	0	0	0	1	0	0	0	0	1	cefazolin	1	1	0	1	1	2024-04-22	0	1	0					0	psoas abscess s/p drainage on 4/23, had fevers up until drainage, TTE changes Grade II DD (grade I), dec RV fxn (nrml), mild stenosis (none); last TTE was 4 years ago
25	2024-04-19	2024-04-26	7	79	1	2	1	0	0	1	0	0	1	G2DD	Staphylococcus aureus	1	1	2024-04-19	2024-04-19	0	0	0	0	0	0	0	0	0	1	1	cefazolin	1	1	1	0	1	2024-04-24	0	0	1	2024-04-26	0	0	0	0	source maybe post complication scalp Moh's sx?, ESRD on HD left AV fistula,
26	2024-04-19	2024-06-04	46	46	2	2	1	1	0	0	1	0	0		Methicillin-Resistant Staphylococcus aureus	1	3	2024-04-19	2024-04-22	3	1	0	0	1	0	0	0	0	0	1	vanc	1	0	1	1	1	2024-04-24	0	0	1	2024-04-26	0	0	0	0	fabry disease 2 wk infusion via chest port likely source, port removed this adm w/ cath tip pos for MRSA, IVDU, hx of MRSA bact tx w/ 6wk abx
27	2024-04-20	2024-04-30	10	87	2	2	1	0	0	0	0	0	1	mod MS, G1DD	Staphylococcus aureus	1	2	2024-04-20	2024-04-21	1	0	0	0	0	0	0	0	0	0	1	cefazolin	1	1	1	1	1	2024-04-24	0	0	1	2024-04-29	0	0	1	0	changed from 6 to 4 week abx course
28	2024-04-23	2024-05-11	18	66	1	2	1	0	0	0	0	0	1	G2DD	Staphylococcus aureus	1	4	2024-04-23	2024-04-26	3	1	1	0	0	1	0	0	0	0	1	cefazolin	1	0	1	0	1	2024-04-29	0	0	0					1	lumbar OM, psoas and epidural abscess, need 8 wks for epidural abs, neurosx intervene had post op fever, MICU
29	2024-04-24	2024-05-12	18	59	2	2	1	0	0	0	1	0	1	G1DD	Staphylococcus aureus	1	3	2024-04-24	2024-04-27	3	1	0	0	1	0	0	0	0	0	1	cefazolin	1	1	1	1	1	2024-05-03	1	0	0					1	PICC for TPN likely source,
30	2024-04-21	2024-04-30	9	72	1	2	1	0	0	0	0	0	1	anterolat hypokinesis, apical kinesis, HFmrEF	Staphylococcus aureus	1	2	2024-04-25	2024-04-27	2	1	1	0	0	0	0	0	0	1	1	cefazolin	1	1	1	1	1	2024-04-26	0	0	0					0	septic arthritis L shoulder, coded on day 7, TEE was considered
31	2024-04-24	2024-05-10	16	71	2	2	1	0	0	0	0	0	1	mod TR, G1DD	Staphylococcus aureus	1	2	2024-04-27	2024-04-28	1	1	1	0	0	1	0	0	0	1	1	nafcillin	1	1	1	1	1	2024-05-02	0	0	0					0	source poss from OM, psoas/epidural abscess, septic phlebitis, TTE this adm shows minimal TR now
32	2024-02-25	2024-06-11	107	54	1	3	0	0	0	0	0	0	0		Methicillin-Resistant Staphylococcus aureus	1	4	2024-04-25	2024-04-28	3	1	0	1	0	0	0	0	0	0	1	vanc	1	1	0	1	1	2024-04-29	0	0	0					1	open sacral wound likely source, had central fevers as well, drug fever
33	2024-02-29	2024-03-28	28	28	2	2	1	1	0	0	0	0	0		Methicillin-Resistant Staphylococcus aureus	1	3	2024-02-29	2024-03-02	2	1	0	0	0	0	0	1	0	0	1	vanc	1	1	0	1	1	2024-03-01	0	1	1	2024-03-14	0	1	0	0	necrotizing MRSA PNA, transitioned to PO linezolid for last 2 weeks, now noting mild-mod TR on this TTE, TEE showed mod TR and thickening of TV could rep as scarring old veg? or inflammatory process
34	2024-02-21	2024-03-17	25	82	1	2	1	0	0	0	1	0	1	sev AS	Staphylococcus aureus	1	2	2024-02-29	2024-03-01	1	1	0	0	1	0	0	0	1	0	1	vanc	1	0	1	0	1	2024-03-01	0	1	0					1	port for chemo growing MSSA, TTE this adm show now mod-sev RV dysfxn, right atrial dilation, still sev AS, MICU
35	2024-02-20	2024-03-05	14	83	1	2	0	0	0	0	0	0	0		Staphylococcus aureus	1	2	2024-03-01	2024-03-04	3	1	0	0	0	0	0	1	0	0	1	vanc cefepime	0	0	1	1	0									0	pt critically sick, bcx positive days into adms, was already on abx before bcx pos
36	2024-03-04	2024-03-27	23	79	2	2	1	0	0	0	0	0	1	G3DD, mod RV dilation	Methicillin-Resistant Staphylococcus aureus	1	5	2024-03-04	2024-03-08	4	0	0	0	0	0	0	0	0	0	1	Daptomycin	1	1	1	1	1	2024-03-06	0	0	1	2024-03-13	0	0	0	0	needed EGD first before TEE 2/2 esoph varices
37	2024-03-05	2024-04-01	27	77	2	3	1	0	0	1	0	0	1	sev biatrial enlarge, mod TR	Staphylococcus aureus	1	3	2024-03-13	2024-03-15	2	0	0	0	0	0	0	0	0	0	1	cefazolin	1	0	1	1	1	2024-03-14	0	0	1	2024-03-15	1	0	0	0	TEE showed TV veg, req pacemaker removal, narrowed cef/vanc to cefazolin and was CONSIDERING CT surgery but never consulted
38	2024-03-13	2024-03-26	13	95	2	4	0	0	0	0	0	0	0		Staphylococcus aureus	1	5	2024-03-13	2024-03-17	4	1	0	0	0	0	0	0	0	1	1	cefazolin	1	1	1	1	1	2024-03-15	0	0	0					0	source poss excoriation nose picking??
39	2024-04-08	2024-05-13	35	42	2	4	1	1	0	0	0	0	0		Methicillin-Resistant Staphylococcus aureus	1	5	2024-04-11	2024-04-16	5	1	1	1	0	0	0	0	0	0	1	Daptomycin	1	1	0	1	1	2024-04-15	0	0	1	2024-04-15	0	0	0	0	scattered pos bcx, hx of MULTIPLE MRSA bacteremia and septic joint
40	2024-03-27	2024-03-29	2	64	2	2	1	0	0	0	0	0	1	G2DD	Staphylococcus aureus	1	3	2024-03-27	2024-03-28	1	0	0	0	0	0	0	0	0	0	1	cefazolin	1	1	1	0	1	2024-03-28	1	1	0					1	TTE this adm mitral valve veg w/ mod AS
41	2024-03-28	2024-04-08	11	87	2	2	1	0	0	1	0	0	0	HFrEF	Staphylococcus aureus	1	4	2024-03-28	2024-03-31	3	0	0	0	0	0	0	0	0	0	1	nafcillin	1	1	0	0	1	2024-04-01	0	0	0					0	CRT device, need lifelong abx after 6wk IV
42	2024-03-30	2024-04-30	31	69	2	3	0	0	0	0	0	0	0		Methicillin-Resistant Staphylococcus aureus	0	1	2024-03-30	2024-03-30	0	0	0	0	0	0	0	0	0	0	1	Daptomycin	1	1	1	1	1	2024-04-01	0	1	1	2024-04-03	0	0	1	0	TTE this adm G2DD, developed asp pna later on, abx adj from vanc to dapt after TEE
43	2024-05-31	2024-06-12	12	70	2	2	0	0	0	0	0	0	0		Streptococcus mutans	0	1	2024-06-01	2024-06-01	0	1	1	0	0	0	0	0	0	0	1	ceftriaxone	1	1	1	1	1	2024-06-05	0	1	0					0	OM symph pupis, did 6-8wk for OM, TTE this adm G1DD
44	2024-06-06	2024-06-10	4	78	2	2	1	0	0	0	1	0	0		Streptococcus mitis group	0	1	2024-06-06	2024-06-06	0	1	0	0	0	0	0	0	0	1	1	ceftriaxone	0	1	1	1	0				0					0	AML on chemo via PICC, neutropenic fever, source GI translocation vs oral mucositis, WAS TRANSF TO UPENN, CTX for 14 days, is on cephpodoxime ppx for her AML
45	2024-06-07	2024-06-13	6	71	1	2	1	0	1	0	0	0	0		Streptococcus gordonii	0	1	2024-06-07	2024-06-07	0	0	0	0	0	0	0	0	0	0	1	ceftriaxone	1	1	1	1	1	2024-06-10	0	0	1	2024-06-12	0	1	0	0	prosthetic aortic valve, mitral annuloplasty ring, TEE this adm showed mod MR
46	2024-06-12	2024-06-19	7	83	1	5	0	0	0	0	0	0	0		Streptococcus mitis group	0	1	2024-06-12	2024-06-12	0	1	0	0	0	1	0	0	0	0	1	ceftriaxone	1	1	1	1	1	2024-06-14	1	0	0					0	dental abscess, planned 4 wks tx w/ conclusive TTE , repeat echo in 6 wks after discharge
47	2024-06-17	2024-06-22	5	65	1	3	0	0	0	0	0	0	0		Streptococcus mitis group	0	1	2024-06-17	2024-06-17	0	1	0	0	0	0	0	1	0	0	1	ceftriaxone	0	0	1	1	1	2024-06-20	0	1	0					0	TTE this adm showed G2DD, mod conc LVH, only 14 days abx
48	2024-06-30	2024-07-10	10	55	2	2	1	0	0	0	1	0	0		Streptococcus constellatus	0	1	2024-06-30	2024-06-30	0	0	0	0	0	0	0	0	0	0	1	levofloxacin	0	1	0	1	1	2024-07-02	0	0	0					0	pancreas ca w/ chest port, source maybe superinfected tumor, only 14 days abx
49	2024-05-09	2024-05-14	5	58	1	3	0	0	0	0	0	0	1	sev MR	Streptococcus mutans	0	1	2024-05-09	2024-05-09	0	1	0	0	0	0	0	0	0	1	1	ceftriaxone gentamycin	0	1	1	1	1	2024-05-10	0	0	1	2024-05-13	1	0	1	0	source dental wound, had CVA likely 2/2 bact endocard, CT surgery consulted and gentamycin started based off TEE, transferred to Einstein
50	2024-04-29	2024-05-16	17	46	1	3	0	0	0	0	0	0	0		Streptococcus mitis group	0	1	2024-05-11	2024-05-11	0	1	0	0	1	0	0	1	0	0	1	vanc cefepime	0	1	0	0	0					0				1	patient w/ sev liver ca, bcx positve during stay in MICU, likely line related, but was made comfort
51	2024-05-16	2024-06-05	20	77	1	2	0	0	0	0	0	0	0		Streptococcus mitis group	0	1	2024-05-17	2024-05-17	0	1	0	0	0	0	0	0	0	1	1	vanc	1	1	0	0	1	2024-05-21	0	0	1	2024-05-22	0	0	0	1	ext hx AsAA repair complic by sternal wound infxn s/p I/D c flap reconstruct and prolong vanc , source periaortic supurative fluid from graft, abx were adjusted for CT surgery BUT NOT for IE managment
52	2024-05-21	2024-06-04	14	75	1	2	0	0	0	0	0	0	0		Streptococcus mitis group	0	1	2024-05-21	2024-05-21	0	0	0	0	0	0	0	0	0	0	1	ceftriaxone	0	0	1	1	1	2024-05-24	0	0	0					0	has lung ca w/ mets to spine, thought about 4wks abx but said if MRI neg for OM chances of endovas infxn are unlikely, went w/ 14 days abx
53	2024-05-29	2024-06-05	7	54	1	3	0	0	0	0	0	0	0		Streptococcus constellatus	0	1	2024-05-29	2024-05-29	0	1	0	0	0	0	1	0	0	0	1	amoxicillin clav	0	0	1	1	0				0					0	diverticulitis w/ bowel perf peritonitis, 14 days PO abx
54	2024-04-13	2024-05-08	25	78	2	2	0	0	0	0	0	0	0		Streptococcus anginosus	0	1	2024-04-13	2024-04-13	0	1	0	0	0	0	0	0	0	1	1	meropenem	1	1	0	0	1	2024-04-20	0	0	0					1	source odontogenic sinusitis w/ invasion to brain, cx positve in oral and brain, transferred to TJIH 4/15/24 for neurosx ICU, comfort care inpatient hospice 5/7/24
55	2024-04-27	2024-05-23	26	36	1	3	0	0	0	0	0	0	0		Streptococcus constellatus	0	1	2024-04-27	2024-04-27	0	1	0	0	0	1	1	0	0	0	1	ceftriaxone	1	1	1	0	1	2024-05-01	0	0	0					1	source liver abscess, fever on 5/3/24 day of liver drain,
56	2024-04-28	2024-05-03	5	95	2	2	0	0	0	0	0	0	0		Streptococcus mitis group	0	1	2024-04-28	2024-04-28	0	0	0	0	0	0	0	0	0	0	1	ceftriaxone	0	0	1	1	1	2024-05-02	0	0	0					0	thought to be contaminent, covid +
57	2024-03-05	2024-03-15	10	42	1	2	1	0	0	0	0	0	1	bicuspid AV and AS	Streptococcus gordonii	1	2	2024-03-05	2024-03-06	1	0	0	0	0	0	0	0	0	0	1	ceftriaxone	1	1	1	1	1	2024-03-06	1	1	1	2024-03-08	1	1	0	0	likely dental source, TTE found mod AR and sev AS G2DD, TEE (intraop w/ CT sx) showed same, decision to get CT sx involved after TTE NOT TEE 2/2 VERY CLASSIC picture of IE
58	2024-03-06	2024-04-03	28	37	2	2	0	0	0	0	0	0	0		Streptococcus anginosus	0	1	2024-03-06	2024-03-06	0	1	0	1	0	1	0	0	0	0	1	cefazolin levofloxacin	1	1	1	1	1	2024-03-08	0	0	0					1	paralyzed at baseline, source likely mult open wounds or spinal abscess, levofloxacin changed to PO
59	2024-03-08	2024-03-15	7	86	1	2	0	0	0	0	0	0	1	G1DD, mod AS	Streptococcus mutans	0	1	2024-03-08	2024-03-08	0	1	0	0	0	0	0	0	1	0	1	amoxicillin	0	0	1	1	1	2024-03-12	0	1	0					0	TTE found mod-sev MR, mod AS, mod TR
60	2024-03-18	2024-03-26	8	74	2	2	0	0	0	0	0	0	1	G1DD	Streptococcus mitis group	0	1	2024-03-18	2024-03-18	0	1	0	0	0	1	0	0	0	1	1	ceftriaxone	1	0	1	1	0				0					0	recent prosthetic R hip 2 wks ago, susp for infxn, ortho said no intervent, transferred to Temple for ortho reeval, they found abscess when I&D
61	2024-03-29	2024-04-01	3	74	1	2	0	0	0	0	0	0	0	bicuspid AV, mod MR, AS, AR, G1DD	Streptococcus sanguinis	0	1	2024-03-29	2024-03-29	0	0	0	0	0	0	0	0	0	0	0						0				0						was made comfort care the day of admis
62	2024-03-30	2024-04-05	6	73	2	2	1	0	1	0	0	0	1	mod MR, sev MS, prosthetic AV, mod TR	Streptococcus lutetiensis	0	1	2024-03-30	2024-03-30	0	1	0	0	0	0	1	0	0	0	1	cefazolin	0	0	1	1	0				0					0	source gallstone complications, ID said low susp for intravasc infxn, transitioned to PO abx, made comfort
63	2024-06-15	2024-06-24	9	87	2	5	0	0	0	0	0	0	0	G1DD	Enterococcus faecalis	1	2	2024-06-14	2024-06-15	1	1	0	0	0	0	0	0	1	0	1	amoxicillin	0	1	1	1	1	2024-06-19	0	0	0					0	was on ampicillin inpatient, switched to PO amox 500 TID for 14 days total tx
64	2024-06-16			55	2	2	1	0	0	1	0	0	1	HCM	Enterococcus faecalis	1	4	2024-06-26	2024-06-29	3	0	0	0	0	0	0	0	0	0	1	ceftriaxone ampicillin	1	1	1	1	1	2024-07-12	0	1						1	pacemaker ICD, brain infarct c/f septic emboli, TTE this adm shows mod-sev MR w/ LA sev dilation, PLANNED TEE and ICD removal when stable
65	2024-06-26	2024-07-11	15	86	2	2	1	0	0	1	0	0	0		Enterococcus faecalis	0	1	2024-06-28	2024-06-28	0	1	0	0	0	0	0	0	1	0	1	amoxicillin	0	1	1	1	1	2024-07-01	0	1	0					0	TTE this adm showed mod TR, transitioned abx to PO amox
66	2024-05-10	2024-05-15	5	80	2	3	1	0	0	0	1	0	0		Enterococcus faecalis	1	2	2024-05-10	2024-05-11	1	1	0	0	1	0	0	0	0	0	1	vanc cefepime flagyl	0	0	1	1	0				0					0	dialysis line source, made comfort
67	2024-05-09	2024-05-16	7	77	2	5	0	0	0	0	1	0	1	G1DD	Vancomycin resistant Enterococcus faecalis	1	4	2024-05-09	2024-05-16	7	1	0	0	1	0	1	0	0	0	1	Daptomycin	1	0	1	0	1	2024-05-13	0	0	0					1	dialysis line or intrabdominal source, coded and made comfort
68	2024-05-13	2024-06-01	19	81	1	2	1	0	0	1	0	0	1	HFrEF	Enterococcus faecalis	1	2	2024-05-13	2024-05-14	1	1	0	0	0	0	1	0	0	0	1	ceftriaxone ampicillin	1	1	1	1	1	2024-05-17	0	1	0					0	TTE this adm showed mod MR, source maybe gut translocation from GI cancer, no TEE b/c not candidate for surgery
69	2024-03-30	2024-04-05	6	87	2	3	1	0	0	1	0	0	1	G1DD, mod TR	Enterococcus faecalis	1	3	2024-03-31	2024-04-02	2	0	0	0	0	0	0	0	0	0	1	piperacillin tazo	1	0	1	1	1	2024-04-01	0	1	0					0	TTE this adm showed mod-sev MR TR, no TEE b/c not candidate for sx, made comfort
70	2024-04-16	2024-04-21	5	47	1	2	1	1	0	0	0	0	1	sev TR	Enterococcus faecalis	1	4	2024-04-16	2024-04-21	5	1	0	1	0	0	0	0	0	0	1	ceftriaxone ampicillin	1	1	1	1	1	2024-04-18	1	0	0					0	IVDU, left AMA
71	2024-04-16	2024-05-30	44	54	1	2	1	0	0	0	1	0	0		Enterococcus faecalis	1	5	2024-04-16	2024-04-19	3	1	0	0	1	0	0	0	0	0	1	ceftriaxone ampicillin	1	1	1	1	1	2024-04-19	0	0	0					1	also had fungemia tx w/ micafungin, no TEE not a surgical candidate
72	2024-04-27	2024-05-07	10	82	1	2	1	0	0	0	0	0	1	mod AS	Enterococcus faecalis	0	1	2024-04-29	2024-04-29	0	1	0	0	0	0	0	0	1	0	1	ampicillin	0	1	1	1	1	2024-04-29	0	1	0					0	TTE this adm takosubo CM w/ G1DD, didnt seem to care about the entoroccocus
73	2024-03-24	2024-04-06	13	54	2	2	0	0	0	0	0	0	0		Enterococcus faecalis	1	6	2024-03-24	2024-03-29	5	1	0	0	0	0	0	0	1	0	1	linezolid	0	1	0	1	1	2024-03-29	0	0	1	2024-04-01	0	0	1	0	changed to oral linezolid until 4/7/24 for tx completion, source UTI and had underlying malignancy
74	2024-05-21	2024-05-31	10	71	2	2	1	0	0	0	1	0	1	mod TR, G1DD	Vancomycin resistant Enterococcus faecalis	0	1	2024-05-21	2024-05-21	0	1	0	0	1	0	0	0	0	0	1	Daptomycin	1	0	1	1	1	2024-05-24	0	0	0					0	has PICC in from prev adm 4/24-5/10, PICC removed this adm and replaced, dapto replaced nafcillin
75	2024-04-16	2024-05-30	44	54	1	2	1	0	0	0	1	0	0		Enterococcus faecalis	1	5	2024-04-16	2024-04-19	3	1	0	0	1	0	1	0	0	0	1	ceftriaxone ampicillin	1	1	1	1	1	2024-04-19	0	0	0					0	souce poss from PICC or GI, had multiple bugs growing including fungemia, PICC removed and replaced
76	2024-06-01	2024-06-06	5	69	1	2	1	0	0	0	1	0	0		Staphylococcus epidermidis	0	1	2024-06-01	2024-06-01	0	0	0	0	0	0	0	0	0	0	1	levofloxacin	0	1	1	1	0				0					0	likely contaminent, on chemo via chest port for prostate ca
77	2024-06-02	2024-06-03	1	63	2	2	1	0	0	0	1	0	1	mod TR	Staphylococcus epidermidis	0	1	2024-06-02	2024-06-02	0	1	0	1	1	0	0	0	0	0	1	vanc cefepime	0	1	1		0				0					0	source cellulitis? PICC had erythema (TPN), transferred to Upenn
78	2024-06-04	2024-06-14	10	53	1	2	0	0	0	0	0	0	0		Staphylococcus epidermidis	0	1	2024-06-04	2024-06-04	0	0	0	0	0	0	0	0	0	0	1	vanc cefepime	0	0	1	1	0				0					0	likely contaminent, ED abx use
79	2024-06-06	2024-07-04	28	73	2	2	0	0	0	0	0	0	0		Staphylococcus saccarolyticus	0	1	2024-06-06	2024-06-06	0	1	0	0	0	0	0	0	0	1	1	vanc	0	0	1	0	1	2024-06-10	0	1	0					1	source maybe vasc graft for RLE ischemia, TTE this adm showed sev dec LV fxn 25-30% and Takosubo
80	2024-06-06	2024-06-14	8	69	1	2	1	0	0	0	0	0	1	G1DD	Staphylococcus pettenkoferi	0	1	2024-06-06	2024-06-06	0	0	0	0	0	0	0	0	0	0	1	ampicillin sulb	0	1	0	1	0				0					0	likely contaminent, central fever possibly 2 days after adm from strok prob
81	2024-06-10	2024-06-14	4	63	2	2	0	0	0	0	0	0	0		Staphylococcus epidermidis	0	1	2024-06-10	2024-06-10	0	0	0	0	0	0	0	0	0	0	1	vanc cefepime	0	0	1	1	0				0					0	likely contaminent, presented w/ sepsis pressure wound
82	2024-06-11	2024-06-21	10	76	2	2	0	0	0	0	0	0	0		Staphylococcus epidermidis	0	1	2024-06-11	2024-06-11	0	0	0	0	0	0	0	0	0	0	1	cefazolin ampicillin sulb	0	0	1	1	1	2024-06-12	0	0	0					0	contaminent, TTE not used for IE but for afib
83	2024-06-11	2024-06-20	9	80	1	3	1	0	0	0	1	0	1	G3DD	Staphylococcus pettenkoferi	0	1	2024-06-11	2024-06-11	0	1	0	0	1	0	0	0	0	0	1	vanc	0	0	1	1	1	2024-06-14	0	1	0					0	has midline cath, removed 6/14, TTE this adm showed mod MR, TR
84	2024-06-12	2024-06-20	8	81	1	3	0	0	0	0	0	0	0		Staphylococcus epidermidis	0	1	2024-06-12	2024-06-12	0	0	0	0	0	0	0	0	0	0	1	vanc cefepime	0	0	1	1	1	2024-06-13	0	0	0					1	contam, shock 2/2 poor PO intake momentarily, made comfort
85	2024-06-14	2024-06-25	11	59	1	3	0	0	0	0	0	0	0		Staphylococcus epidermidis	1	3	2024-06-14	2024-06-17	3	1	1	1	0	0	0	0	0	0	1	cefazolin	1	1	1	1	1	2024-06-18	0	0	1	2024-06-20	0	0	0	0
86	2024-06-17	2024-07-02	15	69	2	2	1	0	0	1	0	0	0		Staphylococcus hominis	0	1	2024-06-17	2024-06-17	0	0	0	0	0	0	0	0	0	0	1	cefazolin gentamycin rifampin	0	1	1	1	0				1	2024-06-19	0	0	0	0	went right to TEE, abx tx for presumed MSSE CIED endocarditis
87	2024-06-17	2024-06-19	2	87	2	2	0	0	0	0	0	0	0		Staphylococcus epidermidis	0	1	2024-06-17	2024-06-17	0	0	0	0	0	0	0	0	0	0	0		0	0	1	0	0				0					0	found to have lung ca, refused abx, home hospice
88	2024-06-18	2024-06-19	1	80	2	2	0	0	0	0	0	0	0		Staphylococcus epidermidis	0	1	2024-06-18	2024-06-18	0	0	0	0	0	0	0	0	0	0	0		0	0	1	1	0				0					0	quickly seen and eval by gyn/onc and said can be followed otpt, bcx never addressed
89	2024-06-20	2024-06-23	3	77	2	3	0	0	0	0	0	0	0		Staphylococcus epidermidis	0	1	2024-06-20	2024-06-20	0	0	0	0	0	0	0	0	0	0	0		0	1	1	1	0				0					0	contam, had covid, no abx, pos bcx never addressed
90	2024-06-21	2024-06-27	6	58	2	2	0	0	0	0	0	0	1	mod MS	Staphylococcus epidermidis	0	1	2024-06-21	2024-06-21	0	0	0	0	0	0	0	0	0	0	1	ceftriaxone	0	0	1	0	1	2024-06-24	0	0	0					0	contam, tx for UTI, stroke may explain WBC, made comfort
91	2024-06-22	2024-06-23	1	86	2	2	0	0	0	0	0	0	0		Staphylococcus epidermidis	0	1	2024-06-22	2024-06-22	0	0	0	0	0	0	0	0	0	0	0		0	0	1	0	0				0					0	contam, instantly made comfort
92	2024-06-28	2024-06-28	0	89	1	3	1	0	0	0	0	0	1	G1DD	Staphylococcus epidermidis	0	1	2024-06-28	2024-06-28	0	0	0	0	0	0	0	0	0	0	0		0	0	0	0	0				0					0	immediately code blue in the ED
93	2024-06-28	2024-07-12	14	68	2	2	1	0	0	0	0	0	1	G1DD	Staphylococcus epidermidis	0	1	2024-06-28	2024-06-28	0	0	0	0	0	0	0	0	0	0	1	cefazolin	0	0	1	1	1	2024-07-03	0	1	0					0	contam, TTE found G2DD
94	2024-05-02	2024-05-09	7	84	1	3	0	0	0	0	0	0	0		Staphylococcus epidermidis	0	1	2024-05-02	2024-05-02	0	0	0	0	0	0	0	0	0	0	1	vanc cefepime	0	0	1	1	0				0					0	contam
95	2024-04-29	2024-05-20	21	72	2	2	0	0	0	0	0	0	0		Staphylococcus epidermidis	0	1	2024-05-05	2024-05-05	0	0	0	0	0	0	0	0	0	0	1	vanc	0	1	1	1	1	2024-05-07	0	1	0					0	contam, TTE showed HFrEF
96	2024-05-06	2024-05-09	3	72	2	5	0	0	0	0	0	0	0		Staphylococcus epidermidis	0	1	2024-05-06	2024-05-06	0	0	0	0	0	0	0	0	0	0	1	vanc	0	0	1	1	0				0					0	contam
97	2024-05-06	2024-05-10	4	42	1	2	0	0	0	0	0	0	0		Staphylococcus epidermidis	0	1	2024-05-06	2024-05-06	0	0	0	0	0	0	0	0	0	0	1	vanc cefepime	0	0	1	1	0				0					0	contam
98	2024-05-07	2024-05-24	17	57	1	2	0	0	0	0	0	0	0		Staphylococcus capitis	0	1	2024-05-07	2024-05-07	0	0	0	0	0	0	0	0	0	0	1	ertapenenm	1	1	0	0	1	2024-05-20	0	0	0					0	contam, found to have liver abscess but not the source, tx 6 wks for abscess NOT IE
99	2024-05-09	2024-05-31	22	57	2	2	0	0	0	0	0	0	0		Staphylococcus epidermidis	0	1	2024-05-09	2024-05-09	0	0	0	0	0	0	0	0	0	0	1	vanc	0	1	0	1	1	2024-05-15	0	0	0					1	contam
100	2024-05-09	2024-05-13	4	74	1	2	0	0	0	0	0	0	0		Staphylococcus epidermidis	0	1	2024-05-09	2024-05-09	0	0	0	0	0	0	0	0	0	0	0		0	0	1	1	0				0					0	contam
101	2024-05-11	2024-05-15	4	90	2	2	1	0	1	0	0	0	1	sev AS s/p TAVR, G2DD	Staphylococcus epidermidis	0	1	2024-05-11	2024-05-11	0	0	0	0	0	0	0	0	0	0	0		0	0	1	1	1	2024-05-15	0	1	0					0	contam, TTE this adm showed mod MR
102	2024-05-11	2024-05-14	3	83	1	2	1	0	0	0	0	0	1	G3DD	Staphylococcus epidermidis	0	1	2024-05-11	2024-05-11	0	0	0	0	0	0	0	0	0	0	1	vanc	0	0	1	1	1	2024-05-14	0	0	0					0	contam
103	2024-05-13	2024-05-24	11	62	2	2	0	0	0	0	0	0	0		Staphylococcus epidermidis	0	1	2024-05-13	2024-05-13	0	0	0	0	0	0	0	0	0	0	1	vanc	0	0	1	1	0				0					0	contam
104	2024-05-13	2024-05-18	5	94	2	2	0	0	0	0	0	0	0		Staphylococcus epidermidis	0	1	2024-05-13	2024-05-13	0	0	0	0	0	0	0	0	0	0	1	ceftriaxone	0	0	1	1	1	2024-05-14	0	0	0					0	contam
105	2024-05-15	2024-05-18	3	79	1	4	1	0	0	0	0	0	1	HFrEF, mod MR	Staphylococcus hominis	0	1	2024-05-15	2024-05-15	0	0	0	0	0	0	0	0	0	0	1	vanc ceftriaxone	0	0	1	1	1	2024-05-17	0	0	0					0	contam
106	2024-05-18	2024-05-27	9	45	2	2	0	0	0	0	0	0	0		Staphylococcus haemolyticus	0	1	2024-05-18	2024-05-18	0	0	0	0	0	0	0	0	0	0	1	vanc	0	0	1	1	0				0					0	contam
107	2024-05-21	2024-05-28	7	75	1	2	0	0	0	0	0	0	0		Staphylococcus epidermidis	0	1	2024-05-21	2024-05-21	0	0	0	0	0	0	0	0	0	0	1	ceftriaxone	0	0	1	1	1	2024-05-28	0	0	0					0	contam
108	2024-05-22	2024-05-27	5	90	1	2	1	0	0	0	0	0	1	mod TR, sev biatrial enlarge	Staphylococcus epidermidis	1	2	2024-05-22	2024-05-22	0	0	0	0	0	0	0	0	0	0	1	cefepime	0	0	1	1	1	2024-05-24	0	0	0					0	contam
109	2024-05-23	2024-06-01	9	88	1	3	0	0	0	0	0	0	0		Staphylococcus pettenkoferi	0	1	2024-05-24	2024-05-24	0	0	0	0	0	0	0	0	0	0	1	vanc cefepime	0	0	1	1	0				0					0	contam
110	2024-05-26	2024-05-30	4	96	2	2	0	0	0	0	0	0	0		Staphylococcus capitis	0	1	2024-05-26	2024-05-26	0	0	0	0	0	0	0	0	0	0	1	vanc	0	0	1	1	0				0					0	contam
111	2024-05-27	2024-06-02	6	75	2	3	1	0	0	0	0	0	1	HFrEF, sev thickened MV AV	Staphylococcus epidermidis	0	1	2024-05-27	2024-05-27	0	0	0	0	0	0	0	0	0	0	1	vanc	0	0	1	1	1	2024-05-28	0	1	0					1	contam, TTE for ACS this adm showed mod MS MR, severe AS
112	2024-05-27	2024-06-10	14	72	1	2	0	0	0	0	0	0	0		Staphylococcus hominis	0	1	2024-05-27	2024-05-27	0	0	0	0	0	0	0	0	0	0	1	vanc	0	0	1	1	0				0					0	contam
113	2024-05-30	2024-05-31	1	39	1	3	0	0	0	0	0	0	0		Staphylococcus epidermidis	0	1	2024-05-30	2024-05-30	0	0	0	0	0	0	0	0	0	0	1	ceftriaxone	0	0	1	1	0				0					0	contam
114	2024-04-02	2024-04-10	8	90	2	2	1	0	0	1	0	0	1	mod MR	Staphylococcus epidermidis	0	1	2024-04-02	2024-04-02	0	0	0	0	0	0	0	0	0	0	1	ampicillin sulb	0	0	1	1	0				0					0	contam
115	2024-04-03	2024-04-07	4	92	2	2	0	0	0	0	0	0	0		Staphylococcus epidermidis	0	1	2024-04-03	2024-04-03	0	0	0	0	0	0	0	0	0	0	1	vanc cefepime	0	0	1	1	0				0					0	contam
116	2024-04-08	2024-07-15	98	51	1	2	1	0	0	0	1	0	1	HFrEF	Staphylococcus epidermidis	0	1	2024-04-08	2024-04-08	0	1	0	0	1	0	0	0	0	0	1	cefazolin	0	0	1	1	1	2024-04-09	0	0	0					1	contam, PICC for TPN that was NOT removed this adm, was growing fungemia way later in the adm
117	2024-04-10	2024-04-12	2	32	1	2	0	0	0	0	0	0	0		Staphylococcus epidermidis	0	1	2024-04-10	2024-04-10	0	0	0	0	0	0	0	0	0	0	0		0	0	1	1	0				0					0	contam
118	2024-04-10	2024-04-10	0	79	1	2	1	0	0	0	0	0	1	HFrEF	Staphylococcus epidermidis	0	1	2024-04-10	2024-04-10	0	0	0	0	0	0	0	0	0	0	0		0	0	1	1	0				0					0	died immediatley on admission
119	2024-04-13	2024-04-19	6	81	2	2	0	0	0	0	0	0	1	G1DD	Staphylococcus epidermidis	0	1	2024-04-13	2024-04-13	0	1	0	0	0	0	0	0	1	0	1	vanc	0	0	1	1	1	2024-04-17	0	0	0					0	Ucx also grew s.epi
120	2024-04-14	2024-04-30	16	66	1	2	0	0	0	0	0	0	0		Staphylococcus haemolyticus	1	2	2024-04-14	2024-04-15	1	0	0	0	0	0	0	0	0	0	1	vanc	0	1	1	1	1	2024-04-19	0	0	0					0	contam
121	2024-04-16	2024-04-19	3	79	1	2	1	0	1	0	0	0	1	G1DD, s/p TAVR	Staphylococcus epidermidis	0	1	2024-04-16	2024-04-16	0	0	0	0	0	0	0	0	0	0	1	ceftriaxone	0	0	1	1	1	2024-04-18	0	0	0					0	contam
122	2024-04-16	2024-04-30	14	78	2	2	1	0	1	0	0	0	1	G2DD, s/p TAVR	Staphylococcus epidermidis	1	4	2024-04-16	2024-04-22	6	0	0	0	0	0	0	0	0	0	1	vanc	1	1	1	1	1	2024-04-17	0	1	1	2024-04-22	1	1	0	0	TEE this adm showed mod-sev MR, they did x2 more TTE's after TEE to assess clinically, consulted CT sx but they rec IV abx
123	2024-03-14	2024-05-08	55	38	1	2	0	0	0	0	0	0	0		Staphylococcus epidermidis	0	1	2024-04-18	2024-04-18	0	0	0	0	0	0	0	0	0	0	1	vanc	0	1	1	1	0				0					1	contam, TTE done before positve bcx due to shock and PE, level 1 trauma
124	2024-04-20	2024-04-26	6	86	2	2	0	0	0	0	0	0	0		Staphylococcus hominis	0	1	2024-04-20	2024-04-20	0	0	0	0	0	0	0	0	0	0	1	vanc	0	1	1	1	0				0					0	contam
125	2024-04-23	2024-05-01	8	58	2	2	1	0	0	0	0	0	1	G1DD, mod TR	Staphylococcus haemolyticus	0	1	2024-04-23	2024-04-23	0	0	0	0	0	0	0	0	0	0	1	vanc	0	0	1	1	0				0					0	contam
126	2024-04-24	2024-04-30	6	28	1	2	0	0	0	0	0	0	0		Staphylococcus capitis	0	1	2024-04-24	2024-04-24	0	0	0	0	0	0	0	0	0	0	1	vanc	0	0	1	1	0				0					0	contam
127	2024-04-25	2024-05-19	24	89	2	3	0	0	0	0	0	0	0		Staphylococcus hominis	0	1	2024-04-25	2024-04-25	0	0	0	0	0	0	0	0	0	0	1	cefepime	0	0	1	1	1	2024-05-07	0	1	0					0	contam, TTE this adm G2DD
128	2024-04-26	2024-05-17	21	88	2	2	1	0	0	1	0	0	1	mod TR	Staphylococcus epidermidis	0	1	2024-04-26	2024-04-26	0	0	0	0	0	0	0	0	0	0	1	vanc meropenem	0	0	1	0	1	2024-05-07	0	1	0					0	contam
129	2024-04-27	2024-05-01	4	43	2	2	1	0	0	0	0	0	1	MVP s/p repair	Staphylococcus capitis	0	1	2024-04-27	2024-04-27	0	0	0	0	0	0	0	0	0	0	1	vanc	0	0	1	1	1	2024-04-29	0	0	0					0	contam
130	2024-04-30	2024-05-07	7	92	1	2	0	0	0	0	0	0	0		Staphylococcus capitis	0	1	2024-04-30	2024-04-30	0	0	0	0	0	0	0	0	0	0	1	vanc cefepime	0	0	1	1	0				0					0	contam, hospice
131	2024-03-01	2024-03-08	7	82	2	2	0	0	0	0	0	0	0		Staphylococcus capitis	0	1	2024-03-01	2024-03-01	0	0	0	0	0	0	0	0	0	0	1	ceftriaxone	0	0	1	1	0				0					0	contam, hospice
132	2024-03-02	2024-03-09	7	44	2	3	1	0	0	0	1	0	0		Staphylococcus hominis	0	1	2024-03-02	2024-03-02	0	0	0	0	0	0	0	0	0	0	1	vanc	0	1	1	1	0				0					0	contam, had chest port for chemo for breast ca
133	2024-03-03	2024-03-14	11	65	1	2	0	0	0	0	0	0	0		Staphylococcus epidermidis	0	1	2024-03-03	2024-03-03	0	0	0	0	0	0	0	0	0	0	1	doxycycline	0	0	1	1	1	2024-03-06	0	0	0					0	contam
134	2024-03-03	2024-03-07	4	77	2	3	0	0	0	0	0	0	0		Staphylococcus capitis	0	1	2024-03-03	2024-03-03	0	0	0	0	0	0	0	0	0	0	1	vanc	0	1	1	1	1	2024-03-06	0	0	0					0	contam
135	2024-03-05	2024-03-12	7	70	1	2	0	0	0	0	0	0	0		Staphylococcus epidermidis	0	1	2024-03-05	2024-03-05	0	0	0	0	0	0	0	0	0	0	1	vanc cefepime	0	0	1	1	1	2024-03-11	0	1	0					0	contam, TTE this adm mod TR
136	2024-03-06	2024-03-09	3	70	1	3	0	0	0	0	0	0	0		Staphylococcus hominis	0	1	2024-03-06	2024-03-06	0	0	0	0	0	0	0	0	0	0	1	ceftriaxone	0	0	1	1	0				0					0	contam, covid positve
137	2024-03-08	2024-03-11	3	75	1	3	1	0	0	0	0	0	1	G1DD	Staphylococcus hominis	0	1	2024-03-08	2024-03-08	0	0	0	0	0	0	0	0	0	0	1	ceftriaxone	0	0	1	1	1	2024-03-10	0	1	0					0	contam, TTE done for pericardial effusion which is new
138	2024-03-08	2024-03-11	3	60	2	3	0	0	0	0	0	0	0		Staphylococcus hominis	0	1	2024-03-08	2024-03-08	0	0	0	0	0	0	0	0	0	0	1	ceftriaxone	0	0	1	1	0				0					0	contam
139	2024-03-10	2024-03-22	12	71	1	2	1	0	0	0	1	0	0		Staphylococcus epidermidis	0	1	2024-03-10	2024-03-10	0	1	0	0	1	0	0	0	0	0	1	linezolid levofloxacin	0	1	1	1	1	2024-03-11	0	0	0					0	poss PICC source
140	2024-03-11	2024-03-16	5	80	2	2	1	0	0	0	0	0	1	G1DD	Staphylococcus hominis	0	1	2024-03-11	2024-03-11	0	0	0	0	0	0	0	0	0	0	1	cefuroxime	0	1	1	0	1	2024-03-15	0	0	0					0	contam
141	2024-03-11	2024-03-19	8	61	1	3	0	0	0	0	0	0	0		Staphylococcus hominis	0	1	2024-03-11	2024-03-11	0	0	0	0	0	0	0	0	0	0	1	cefepime	0	1	1	1	1	2024-03-13	0	0	0					0	contam
142	2024-03-14	2024-03-26	12	54	1	2	1	0	0	0	1	0	0		Staphylococcus epidermidis	0	1	2024-03-14	2024-03-14	0	1	0	0	1	0	0	0	0	0	1	daptomycin	0	1	1	1	1	2024-03-19	0	0	0					0	poss PICC source, removed and replaced
143	2024-03-14	2024-03-27	13	74	1	2	0	0	0	0	0	0	0		Staphylococcus epidermidis	0	1	2024-03-14	2024-03-14	0	0	0	0	0	0	0	0	0	0	1	vanc cefepime	0	0	1	0	0				0					0	contam
144	2024-03-16	2024-03-19	3	53	1	5	0	0	0	0	0	0	0		Staphylococcus epidermidis	0	1	2024-03-16	2024-03-16	0	0	0	0	0	0	0	0	0	0	1	ceftriaxone	0	0	1	1	0				0					0	contam
145	2024-03-17	2024-03-25	8	23	2	2	0	0	0	0	0	0	0		Staphylococcus epidermidis	0	1	2024-03-17	2024-03-17	0	0	0	0	0	0	0	0	0	0	1	vanc	0	1	0	1	1	2024-03-22	0	0	0					0	contam
146	2024-03-12	2024-04-19	38	41	1	3	1	0	0	0	1	0	0		Staphylococcus epidermidis	0	1	2024-03-19	2024-03-19	0	1	0	0	1	0	0	0	0	0	1	vanc	1	1	1	1	1	2024-03-21	0	0	0					0	source likely chemoport c/b nosocomial infx
147	2024-03-21	2024-03-26	5	73	2	2	1	0	0	0	1	0	0		Staphylococcus hominis	0	1	2024-03-21	2024-03-21	0	0	0	0	0	0	0	0	0	0	1	vanc cefepime	0	1	1	1	0				0					0	contam, has chestport for chemo
148	2024-03-27	2024-04-05	9	59	2	2	0	0	0	0	0	0	0		Staphylococcus epidermidis	0	1	2024-03-27	2024-03-27	0	0	0	0	0	0	0	0	0	0	1	ceftriaxone	0	1	1	1	0				0					0	contam
			Mean	12.7671	69.2432			73	5	6	11	25	2	59			50	263			134	63	9	13	18	12	8	6	9	13	137		55	75	128	121	99				21					27
			Median	9	72
			Mode	7	77			23	0	0	3	6	1	20	MSSA	31	26	75			52	22	4	5	4	7	2	3	3	6	30		24	24	25	21	28				7					10
			SD	14.5375	16.1104			8	4	1	1	3	1	5	MRSA	11	9	47			40	7	3	4	2	1	0	1	0	1	11		10	7	8	10	10				6					3
			Max	107	96
			Min	0	23			0	0	0	0	0	0	2	Strep mutans	3	0	3			0	3	1	0	0	0	0	0	1	1	3		1	2	3	3	3				1					0
								1	0	0	0	1	0	1	Strep mitis group	8	0	8			0	6	0	0	1	2	0	2	0	3	8		3	4	6	6	5				1					2
								2	0	1	0	0	0	1	Strep gordornii	2	1	3			1	0	0	0	0	0	0	0	0	0	2		2	2	2	2	2				2					0
								1	0	0	0	1	0	0	Strep constellatus	3	0	3			0	2	0	0	0	1	2	0	0	0	3		1	2	2	2	2				0					1
		Male	Female					0	0	0	0	0	0	0	Strep anginosus	2	0	2			0	2	0	1	0	1	0	0	0	1	2		2	2	1	1	2				0					2
		74	74					0	0	0	0	0	0	0	Strep sanguinis	1	0	1			0	0	0	0	0	0	0	0	0	0	0		0	0	0	0	0				0					0
		White	Black	Hisp	Asian			1	0	1	0	0	0	1	Strep lutetiensis	1	0	1			0	1	0	0	0	0	1	0	0	0	1		0	0	1	1	0				0					0
		108	31	3	6
								9	1	0	4	3	0	5	E.faecalis	11	9	35			24	9	0	1	3	0	2	0	4	0	11		6	9	10	11	10				1					2
								1	0	0	0	2	0	2	VRE	2	1	5			7	2	0	0	2	0	1	0	0	0	2		2	0	2	1	2				0					1
								17	0	3	2	6	0	15	Staph epidermidis	47	3	53			9	7	1	2	5	0	0	0	1	0	38		3	13	44	40	24				2					5
								6	0	0	1	2	0	3	Staph hominis	12	0	12			0	0	0	0	0	0	0	0	0	0	12		0	6	12	11	5				1					0
								1	0	0	0	0	0	1	Staph capitis	7	0	7			0	0	0	0	0	0	0	0	0	0	7		1	2	6	6	3				0					0
								1	0	0	0	0	0	1	Staph haemolyticus	3	1	4			1	0	0	0	0	0	0	0	0	0	3		0	1	3	3	1				0					0
								2	0	0	0	1	0	2	Staph pettenkoferi	3	0	3			0	1	0	0	1	0	0	0	0	0	3		0	1	2	3	1				0					0
								0	0	0	0	0	0	0	Staph saccarolyticus	1	0	1			0	1	0	0	0	0	0	0	0	1	1		0	0	1	0	1				0					1
								73	5	6	11	25	2	59	check	148	50	263			134	63	9	13	18	12	8	6	9	13	137		55	75	128	121	99				21					27

## Sheet: Modified
Subject #	Admission Date	Discharge Date	LOS	Age	Sex	Race	Comorbidity present (at least 1)?	IVDU	Prosthetic Valve	Intracardiac device	Chronic in-line cath	Previous IE	Cardio-structural abnormality	Type of abnormality	Bcx initial	Bcx repeat positive?	Total sets of positive Bcx	Date initial positive Bcx	Date last positive Bcx	Days Bcx positive	Alternative source of infx?	OM?	Cellulitis or open wound?	Line related?	Abscess?	Intra-abdominal?	PNA?	UTI?	Other	Abx used?	Abx tx? (ended w/)	Planned longterm abx tx (~4-6wks) +/- PICC?	fever?	< 3 days defervescence or remained afebrile?	WBC downtrend or remained nrml?	TTE used?	TTE date	TTE new valvular veg?	TTE new worsened fxnl findings from previous TTEs?	TEE used?	TEE date	TEE new valvular veg?	TEE new anatomical/fxnl findings?	Abx/tx changed based off TEE?	Pt required ICU level of care?	Comments
1	2024-05-30	2024-06-19	20	85	1	2	1	0	1	1	0	0	1	mod TR, MR, AS w/ TAVR, CABG 2000	Methicillin-Resistant Staphylococcus aureus	1	11	2024-05-30	2024-06-12	13	0	0	0	0	0	0	0	0	0	1	Daptomycin	1	0	1	1	1	2024-05-31	0	0	1	2024-06-03	0	0	0	0	NEVER febrile, TTE prev was BEFORE CABG
2	2024-06-03			78	1	3	0	0	0	0	0	0	0		Methicillin-Resistant Staphylococcus aureus	1	6	2024-06-03	2024-06-07	4	1	1	0	0	0	0	0	0	0	1	Daptomycin	1	1	1	1	1	2024-06-05	0	0	0					1	OM L foot, TEE denied by cards, SICU
3	2024-06-05	2024-06-22	17	62	1	2	1	0	0	0	0	0	1	thickened AV leaf	Staphylococcus aureus	1	5	2024-06-05	2024-06-11	6	0	0	0	0	0	0	0	0	1	1	Ertapenem nafcillin	0	1	0	1	1	2024-06-05	0	0	1	2024-06-12	0	1	0	1	MICU, was on ertapenem, nafcillin, clindamycin early on, source septic arthritis R knee aspiration, TTE this adm showed mod-sev AR
4	2024-06-06	2024-06-12	6	77	1	2	0	0	0	0	0	0	0		Staphylococcus aureus	1	2	2024-06-06	2024-06-07	1	1	0	0	0	0	0	0	1	1	1	cefazolin	0	1	1	1	1	2024-06-07	0	0	1	2024-06-10	0	0	0	0	infected kidney stone
5	2024-06-10	2024-06-13	3	71	1	2	1	0	0	0	1	1	1	G3DD, sev LA dilation	Staphylococcus aureus	1	2	2024-06-10	2024-06-11	1	1	0	0	0	1	0	0	0	0	1	vanc zosyn	1	1	1	0	1	2024-06-11	1	1	0					1	prev IE on Mitral valve, TTE this adm show mod MR, tx w/ PICC, chole and psoas abscess, MICU
6	2024-06-11	2024-06-22	11	81	1	2	1	0	0	0	0	0	1	mod MR, TR, sev biatrial enlarge	Staphylococcus aureus	1	4	2024-06-11	2024-06-15	4	1	0	1	0	0	1	0	0	0	1	Ertapenem cefazolin	0	1	1	0	1	2024-06-12	0	0	0					1	MICU
7	2024-06-10	2024-07-12	32	45	2	2	0	0	0	0	0	0	0		Staphylococcus aureus	0	1	2024-06-12	2024-06-12	0	0	0	0	0	0	0	0	0	0	1	cefazolin	1	0	1	1	1	2024-06-14	0	0	0					1	MICU
8	2024-06-13	2024-06-23	10	60	1	3	1	0	0	0	0	0	1	G2DD	Staphylococcus aureus	1	2	2024-06-13	2024-06-14	1	1	0	0	0	1	0	0	0	0	1	cefazolin	1	1	1	1	1	2024-06-14	0	0	0					0
9	2024-06-15	2024-06-27	12	64	2	2	1	0	0	0	1	0	0		Staphylococcus aureus	1	2	2024-06-20	2024-06-21	1	1	0	1	0	0	0	0	0	0	1	cefazolin	1	1	1	1	1	2024-06-24	0	0	0					0	chest port for Br ca w/ brain mets, port negative as source, RUE cellulitis, planned 6wks abx but made comfort
10	2024-06-25	2024-07-02	7	46	1	2	1	1	0	0	1	1	1	1/4/24 veg seen, sev TR,	Methicillin-Resistant Staphylococcus aureus	1	5	2024-06-25	2024-06-30	5	1	1	1	0	1	0	0	0	0	1	Daptomycin	1	1	1	1	1	2024-06-25	1	1	0					0	recurring IE w/ mult adm, been in ICU, prior veg 1/24, bad IVDU not even candidate for PICC, this adm it was NOT due to line related, left AMA, not candidate for CT surgery, TTE this adm showed increased RV dilation and sev pulm HTN
11	2024-06-27	2024-07-28		74	1	2	1	0	0	0	0	0	1	sev calc AV, mod AS, mod TR	Staphylococcus aureus	0	1	2024-06-27	2024-06-27	0	1	0	1	0	0	0	1	0	0	1	vanc cefepime	0	1	1	0	1	2024-06-28	0	1	0					1	wbc confound by new L pyelo, hx of bladdar ca (no chemo), pulm nodule, TTE now shows mod-sev AS, G2DD, biatrial enlarge, MICU
12	2024-05-01	2024-05-11	10	70	1	5	1	0	0	0	1	0	1	G1DD	Staphylococcus aureus	1	2	2024-05-01	2024-05-03	2	1	0	0	1	0	0	0	0	0	1	cefazolin	1	1	1	1	1	2024-05-07	0	1	0					0	ESRD HD MWF, has dialysis cath which was source, suprapub cath, TTE this adm shows significant MR
13	2024-05-02	2024-05-24	22	91	2	2	1	0	0	0	0	0	1	HFrEF	Staphylococcus aureus	1	2	2024-05-02	2024-05-03	1	1	0	0	0	1	0	0	0	0	1	cefazolin	1	1	1	1	1	2024-05-06	0	0	0					0	had recent spinal fusion T8-12 4/2024, spine abscess, IR declined intervent, 8 wks abx maybe lifelong given infxn of hardware
14	2024-05-07	2024-05-21	14	71	2	2	1	0	0	0	1	0	0		Staphylococcus aureus	1	3	2024-05-07	2024-05-10	3	1	0	1	1	0	0	0	0	0	1	cefazolin	1	1	0	1	1	2024-05-08	0	0	0					0	lung ca on chemo, chest port tip also growing MSSA, no TEE 2/2 thrombocytopenia
15	2024-05-08	2024-05-20	12	77	1	2	1	0	0	0	0	0	1	at least mod TR'	Staphylococcus aureus	0	1	2024-05-08	2024-05-08	0	1	0	0	0	1	0	0	1	0	1	cefazolin	1	1	1	1	1	2024-05-09	0	0	1	2024-05-13	0	0	0	0	L hip septic arthritis s/p girdlestone, UTI hx of freq straight cath, resolved findings of TR on TTE
16	2024-05-08	2024-05-23	15	83	2	2	1	0	0	0	0	0	1	PFO, sev biatrial enlarge, G1DD, mod LVH	Staphylococcus aureus	1	3	2024-05-17	2024-05-19	2	0	0	0	0	0	0	0	0	0	1	nafcillin	1	1	1	1	1	2024-05-20	0	0	0					1	bcx positive 10 days into admission, poss in line assc, had 1 TTE prior to pos bcx 5/9/24 and another after, MICU
17	2024-05-26	2024-06-15	20	59	1	3	1	0	0	0	0	0	1	G1DD, mod mitral annular calc	Staphylococcus aureus	1	2	2024-05-28	2024-05-29	1	1	0	1	0	0	0	0	0	0	1	cefazolin	1	1	1	1	1	2024-05-30	1	0	0					0	severely thickened calc mitral valve on admss TTE, CKD5 not on HD but has LUE AV fist w/ recent angioplasty, chronic L toe wound, amputated, PLANNED TEE AFTER ABX
18	2024-04-03	2024-04-13	10	51	1	3	0	0	0	0	0	0	0		Staphylococcus aureus	1	3	2024-04-03	2024-04-06	3	1	1	0	0	0	0	0	0	0	1	cefazolin	1	1	1	1	1	2024-04-05	0	0	1	2024-04-09	0	0	0	0	ESRD on HD right AV fistula, R foot OM
19	2024-04-11	2024-04-16	5	65	2	2	1	0	0	0	0	0	1	thickened AV leaf	Methicillin-Resistant Staphylococcus aureus	1	3	2024-04-11	2024-04-12	1	0	0	0	0	0	0	0	0	1	1	Daptomycin	1	0	1	1	1	2024-04-12	0	1	0					0	septic thrombus in RA, TTE echodensity c/f clot in transit and mild-mod TR, mod TR, was made comfort
20	2024-04-10	2024-04-19	9	85	1	2	0	0	0	0	0	0	0		Staphylococcus aureus	1	2	2024-04-14	2024-04-14	0	0	0	0	0	0	0	0	0	0	1	cefazolin	1	1	1	1	1	2024-04-18	0	0	0					0	4 week abx course w/ lack of acute findings
21	2024-04-18	2024-04-26	8	85	2	2	1	0	0	0	0	0	1	G1DD	Staphylococcus aureus	1	3	2024-04-18	2024-04-20	2	1	0	0	0	1	0	0	0	0	1	cefazolin	1	1	0	1	1	2024-04-22	0	1	0					0	psoas abscess s/p drainage on 4/23, had fevers up until drainage, TTE changes Grade II DD (grade I), dec RV fxn (nrml), mild stenosis (none); last TTE was 4 years ago
22	2024-04-19	2024-04-26	7	79	1	2	1	0	0	1	0	0	1	G2DD	Staphylococcus aureus	1	1	2024-04-19	2024-04-19	0	0	0	0	0	0	0	0	0	1	1	cefazolin	1	1	1	0	1	2024-04-24	0	0	1	2024-04-26	0	0	0	0	source maybe post complication scalp Moh's sx?, ESRD on HD left AV fistula,
23	2024-04-19	2024-06-04	46	46	2	2	1	1	0	0	1	0	0		Methicillin-Resistant Staphylococcus aureus	1	3	2024-04-19	2024-04-22	3	1	0	0	1	0	0	0	0	0	1	vanc	1	0	1	1	1	2024-04-24	0	0	1	2024-04-26	0	0	0	0	fabry disease 2 wk infusion via chest port likely source, port removed this adm w/ cath tip pos for MRSA, IVDU, hx of MRSA bact tx w/ 6wk abx
24	2024-04-20	2024-04-30	10	87	2	2	1	0	0	0	0	0	1	mod MS, G1DD	Staphylococcus aureus	1	2	2024-04-20	2024-04-21	1	0	0	0	0	0	0	0	0	0	1	cefazolin	1	1	1	1	1	2024-04-24	0	0	1	2024-04-29	0	0	1	0	changed from 6 to 4 week abx course
25	2024-04-23	2024-05-11	18	66	1	2	1	0	0	0	0	0	1	G2DD	Staphylococcus aureus	1	4	2024-04-23	2024-04-26	3	1	1	0	0	1	0	0	0	0	1	cefazolin	1	0	1	0	1	2024-04-29	0	0	0					1	lumbar OM, psoas and epidural abscess, need 8 wks for epidural abs, neurosx intervene had post op fever, MICU
26	2024-04-24	2024-05-12	18	59	2	2	1	0	0	0	1	0	1	G1DD	Staphylococcus aureus	1	3	2024-04-24	2024-04-27	3	1	0	0	1	0	0	0	0	0	1	cefazolin	1	1	1	1	1	2024-05-03	1	0	0					1	PICC for TPN likely source,
27	2024-04-21	2024-04-30	9	72	1	2	1	0	0	0	0	0	1	anterolat hypokinesis, apical kinesis, HFmrEF	Staphylococcus aureus	1	2	2024-04-25	2024-04-27	2	1	1	0	0	0	0	0	0	1	1	cefazolin	1	1	1	1	1	2024-04-26	0	0	0					0	septic arthritis L shoulder, coded on day 7, TEE was considered
28	2024-04-24	2024-05-10	16	71	2	2	1	0	0	0	0	0	1	mod TR, G1DD	Staphylococcus aureus	1	2	2024-04-27	2024-04-28	1	1	1	0	0	1	0	0	0	1	1	nafcillin	1	1	1	1	1	2024-05-02	0	0	0					0	source poss from OM, psoas/epidural abscess, septic phlebitis, TTE this adm shows minimal TR now
29	2024-02-25	2024-06-11	107	54	1	3	0	0	0	0	0	0	0		Methicillin-Resistant Staphylococcus aureus	1	4	2024-04-25	2024-04-28	3	1	0	1	0	0	0	0	0	0	1	vanc	1	1	0	1	1	2024-04-29	0	0	0					1	open sacral wound likely source, had central fevers as well, drug fever
30	2024-02-29	2024-03-28	28	28	2	2	1	1	0	0	0	0	0		Methicillin-Resistant Staphylococcus aureus	1	3	2024-02-29	2024-03-02	2	1	0	0	0	0	0	1	0	0	1	vanc	1	1	0	1	1	2024-03-01	0	1	1	2024-03-14	0	1	0	0	necrotizing MRSA PNA, transitioned to PO linezolid for last 2 weeks, now noting mild-mod TR on this TTE, TEE showed mod TR and thickening of TV could rep as scarring old veg? or inflammatory process
31	2024-02-21	2024-03-17	25	82	1	2	1	0	0	0	1	0	1	sev AS	Staphylococcus aureus	1	2	2024-02-29	2024-03-01	1	1	0	0	1	0	0	0	1	0	1	vanc	1	0	1	0	1	2024-03-01	0	1	0					1	port for chemo growing MSSA, TTE this adm show now mod-sev RV dysfxn, right atrial dilation, still sev AS, MICU
32	2024-03-04	2024-03-27	23	79	2	2	1	0	0	0	0	0	1	G3DD, mod RV dilation	Methicillin-Resistant Staphylococcus aureus	1	5	2024-03-04	2024-03-08	4	0	0	0	0	0	0	0	0	0	1	Daptomycin	1	1	1	1	1	2024-03-06	0	0	1	2024-03-13	0	0	0	0	needed EGD first before TEE 2/2 esoph varices
33	2024-03-05	2024-04-01	27	77	2	3	1	0	0	1	0	0	1	sev biatrial enlarge, mod TR	Staphylococcus aureus	1	3	2024-03-13	2024-03-15	2	0	0	0	0	0	0	0	0	0	1	cefazolin	1	0	1	1	1	2024-03-14	0	0	1	2024-03-15	1	0	0	0	TEE showed TV veg, req pacemaker removal, narrowed cef/vanc to cefazolin and was CONSIDERING CT surgery but never consulted
34	2024-03-13	2024-03-26	13	95	2	4	0	0	0	0	0	0	0		Staphylococcus aureus	1	5	2024-03-13	2024-03-17	4	1	0	0	0	0	0	0	0	1	1	cefazolin	1	1	1	1	1	2024-03-15	0	0	0					0	source poss excoriation nose picking??
35	2024-04-08	2024-05-13	35	42	2	4	1	1	0	0	0	0	0		Methicillin-Resistant Staphylococcus aureus	1	5	2024-04-11	2024-04-16	5	1	1	1	0	0	0	0	0	0	1	Daptomycin	1	1	0	1	1	2024-04-15	0	0	1	2024-04-15	0	0	0	0	scattered pos bcx, hx of MULTIPLE MRSA bacteremia and septic joint
36	2024-03-27	2024-03-29	2	64	2	2	1	0	0	0	0	0	1	G2DD	Staphylococcus aureus	1	3	2024-03-27	2024-03-28	1	0	0	0	0	0	0	0	0	0	1	cefazolin	1	1	1	0	1	2024-03-28	1	1	0					1	TTE this adm mitral valve veg w/ mod AS
37	2024-03-28	2024-04-08	11	87	2	2	1	0	0	1	0	0	0	HFrEF	Staphylococcus aureus	1	4	2024-03-28	2024-03-31	3	0	0	0	0	0	0	0	0	0	1	nafcillin	1	1	0	0	1	2024-04-01	0	0	0					0	CRT device, need lifelong abx after 6wk IV
38	2024-03-30	2024-04-30	31	69	2	3	0	0	0	0	0	0	0		Methicillin Resistant Staphylococcus aureus	0	1	2024-03-30	2024-03-30	0	0	0	0	0	0	0	0	0	0	1	Daptomycin	1	1	1	1	1	2024-04-01	0	1	1	2024-04-03	0	0	1	0	TTE this adm G2DD, developed asp pna later on, abx adj from vanc to dapt after TEE
39	2024-05-31	2024-06-12	12	70	2	2	0	0	0	0	0	0	0		Streptococcus mutans	0	1	2024-06-01	2024-06-01	0	1	1	0	0	0	0	0	0	0	1	ceftriaxone	1	1	1	1	1	2024-06-05	0	1	0					0	OM symph pupis, did 6-8wk for OM, TTE this adm G1DD
40	2024-06-06	2024-06-10	4	78	2	2	1	0	0	0	1	0	0		Streptococcus mitis group	0	1	2024-06-06	2024-06-06	0	1	0	0	0	0	0	0	0	1	1	ceftriaxone	0	1	1	1	0				0					0	AML on chemo via PICC, neutropenic fever, source GI translocation vs oral mucositis, WAS TRANSF TO UPENN, CTX for 14 days, is on cephpodoxime ppx for her AML
41	2024-06-07	2024-06-13	6	71	1	2	1	0	1	0	0	0	0		Streptococcus gordonii	0	1	2024-06-07	2024-06-07	0	0	0	0	0	0	0	0	0	0	1	ceftriaxone	1	1	1	1	1	2024-06-10	0	0	1	2024-06-12	0	1	0	0	prosthetic aortic valve, mitral annuloplasty ring, TEE this adm showed mod MR
42	2024-06-12	2024-06-19	7	83	1	5	0	0	0	0	0	0	0		Streptococcus mitis group	0	1	2024-06-12	2024-06-12	0	1	0	0	0	1	0	0	0	0	1	ceftriaxone	1	1	1	1	1	2024-06-14	1	0	0					0	dental abscess, planned 4 wks tx w/ conclusive TTE , repeat echo in 6 wks after discharge
43	2024-06-17	2024-06-22	5	65	1	3	0	0	0	0	0	0	0		Streptococcus mitis group	0	1	2024-06-17	2024-06-17	0	1	0	0	0	0	0	1	0	0	1	ceftriaxone	0	0	1	1	1	2024-06-20	0	1	0					0	TTE this adm showed G2DD, mod conc LVH, only 14 days abx
44	2024-06-30	2024-07-10	10	55	2	2	1	0	0	0	1	0	0		Streptococcus constellatus	0	1	2024-06-30	2024-06-30	0	0	0	0	0	0	0	0	0	0	1	levofloxacin	0	1	0	1	1	2024-07-02	0	0	0					0	pancreas ca w/ chest port, source maybe superinfected tumor, only 14 days abx
45	2024-05-09	2024-05-14	5	58	1	3	0	0	0	0	0	0	1	sev MR	Streptococcus mutans	0	1	2024-05-09	2024-05-09	0	1	0	0	0	0	0	0	0	1	1	ceftriaxone gentamycin	0	1	1	1	1	2024-05-10	0	0	1	2024-05-13	1	0	1	0	source dental wound, had CVA likely 2/2 bact endocard, CT surgery consulted and gentamycin started based off TEE, transferred to Einstein
46	2024-05-16	2024-06-05	20	77	1	2	0	0	0	0	0	0	0		Streptococcus mitis group	0	1	2024-05-17	2024-05-17	0	1	0	0	0	0	0	0	0	1	1	vanc	1	1	0	0	1	2024-05-21	0	0	1	2024-05-22	0	0	0	1	ext hx AsAA repair complic by sternal wound infxn s/p I/D c flap reconstruct and prolong vanc , source periaortic supurative fluid from graft, abx were adjusted for CT surgery BUT NOT for IE managment
47	2024-05-21	2024-06-04	14	75	1	2	0	0	0	0	0	0	0		Streptococcus mitis group	0	1	2024-05-21	2024-05-21	0	0	0	0	0	0	0	0	0	0	1	ceftriaxone	0	0	1	1	1	2024-05-24	0	0	0					0	has lung ca w/ mets to spine, thought about 4wks abx but said if MRI neg for OM chances of endovas infxn are unlikely, went w/ 14 days abx
48	2024-05-29	2024-06-05	7	54	1	3	0	0	0	0	0	0	0		Streptococcus constellatus	0	1	2024-05-29	2024-05-29	0	1	0	0	0	0	1	0	0	0	1	amoxicillin clav	0	0	1	1	0				0					0	diverticulitis w/ bowel perf peritonitis, 14 days PO abx
49	2024-04-13	2024-05-08	25	78	2	2	0	0	0	0	0	0	0		Streptococcus anginosus	0	1	2024-04-13	2024-04-13	0	1	0	0	0	0	0	0	0	1	1	meropenem	1	1	0	0	1	2024-04-20	0	0	0					1	source odontogenic sinusitis w/ invasion to brain, cx positve in oral and brain, transferred to TJIH 4/15/24 for neurosx ICU, comfort care inpatient hospice 5/7/24
50	2024-04-27	2024-05-23	26	36	1	3	0	0	0	0	0	0	0		Streptococcus constellatus	0	1	2024-04-27	2024-04-27	0	1	0	0	0	1	1	0	0	0	1	ceftriaxone	1	1	1	0	1	2024-05-01	0	0	0					1	source liver abscess, fever on 5/3/24 day of liver drain,
51	2024-04-28	2024-05-03	5	95	2	2	0	0	0	0	0	0	0		Streptococcus mitis group	0	1	2024-04-28	2024-04-28	0	0	0	0	0	0	0	0	0	0	1	ceftriaxone	0	0	1	1	1	2024-05-02	0	0	0					0	thought to be contaminent, covid +
52	2024-03-05	2024-03-15	10	42	1	2	1	0	0	0	0	0	1	bicuspid AV and AS	Streptococcus gordonii	1	2	2024-03-05	2024-03-06	1	0	0	0	0	0	0	0	0	0	1	ceftriaxone	1	1	1	1	1	2024-03-06	1	1	1	2024-03-08	1	1	0	0	likely dental source, TTE found mod AR and sev AS G2DD, TEE (intraop w/ CT sx) showed same, decision to get CT sx involved after TTE NOT TEE 2/2 VERY CLASSIC picture of IE
53	2024-03-06	2024-04-03	28	37	2	2	0	0	0	0	0	0	0		Streptococcus anginosus	0	1	2024-03-06	2024-03-06	0	1	0	1	0	1	0	0	0	0	1	cefazolin levofloxacin	1	1	1	1	1	2024-03-08	0	0	0					1	paralyzed at baseline, source likely mult open wounds or spinal abscess, levofloxacin changed to PO
54	2024-03-08	2024-03-15	7	86	1	2	0	0	0	0	0	0	1	G1DD, mod AS	Streptococcus mutans	0	1	2024-03-08	2024-03-08	0	1	0	0	0	0	0	0	1	0	1	amoxicillin	0	0	1	1	1	2024-03-12	0	1	0					0	TTE found mod-sev MR, mod AS, mod TR
55	2024-03-18	2024-03-26	8	74	2	2	0	0	0	0	0	0	1	G1DD	Streptococcus mitis group	0	1	2024-03-18	2024-03-18	0	1	0	0	0	1	0	0	0	1	1	ceftriaxone	1	0	1	1	0				0					0	recent prosthetic R hip 2 wks ago, susp for infxn, ortho said no intervent, transferred to Temple for ortho reeval, they found abscess when I&D
56	2024-06-15	2024-06-24	9	87	2	5	0	0	0	0	0	0	0	G1DD	Enterococcus faecalis	1	2	2024-06-14	2024-06-15	1	1	0	0	0	0	0	0	1	0	1	amoxicillin	0	1	1	1	1	2024-06-19	0	0	0					0	was on ampicillin inpatient, switched to PO amox 500 TID for 14 days total tx
57	2024-06-16			55	2	2	1	0	0	1	0	0	1	HCM	Enterococcus faecalis	1	4	2024-06-26	2024-06-29	3	0	0	0	0	0	0	0	0	0	1	ceftriaxone ampicillin	1	1	1	1	1	2024-07-12	0	1						1	pacemaker ICD, brain infarct c/f septic emboli, TTE this adm shows mod-sev MR w/ LA sev dilation, PLANNED TEE and ICD removal when stable
58	2024-06-26	2024-07-11	15	86	2	2	1	0	0	1	0	0	0		Enterococcus faecalis	0	1	2024-06-28	2024-06-28	0	1	0	0	0	0	0	0	1	0	1	amoxicillin	0	1	1	1	1	2024-07-01	0	1	0					0	TTE this adm showed mod TR, transitioned abx to PO amox
59	2024-05-09	2024-05-16	7	77	2	5	0	0	0	0	1	0	1	G1DD	Vancomycin resistant Enterococcus faecalis	1	4	2024-05-09	2024-05-16	7	1	0	0	1	0	1	0	0	0	1	Daptomycin	1	0	1	0	1	2024-05-13	0	0	0					1	dialysis line or intrabdominal source, coded and made comfort
60	2024-05-13	2024-06-01	19	81	1	2	1	0	0	1	0	0	1	HFrEF	Enterococcus faecalis	1	2	2024-05-13	2024-05-14	1	1	0	0	0	0	1	0	0	0	1	ceftriaxone ampicillin	1	1	1	1	1	2024-05-17	0	1	0					0	TTE this adm showed mod MR, source maybe gut translocation from GI cancer, no TEE b/c not candidate for surgery
61	2024-03-30	2024-04-05	6	87	2	3	1	0	0	1	0	0	1	G1DD, mod TR	Enterococcus faecalis	1	3	2024-03-31	2024-04-02	2	0	0	0	0	0	0	0	0	0	1	piperacillin tazo	1	0	1	1	1	2024-04-01	0	1	0					0	TTE this adm showed mod-sev MR TR, no TEE b/c not candidate for sx, made comfort
62	2024-04-16	2024-04-21	5	47	1	2	1	1	0	0	0	0	1	sev TR	Enterococcus faecalis	1	4	2024-04-16	2024-04-21	5	1	0	1	0	0	0	0	0	0	1	ceftriaxone ampicillin	1	1	1	1	1	2024-04-18	1	0	0					0	IVDU, left AMA
63	2024-04-16	2024-05-30	44	54	1	2	1	0	0	0	1	0	0		Enterococcus faecalis	1	5	2024-04-16	2024-04-19	3	1	0	0	1	0	0	0	0	0	1	ceftriaxone ampicillin	1	1	1	1	1	2024-04-19	0	0	0					1	also had fungemia tx w/ micafungin, no TEE not a surgical candidate
64	2024-04-27	2024-05-07	10	82	1	2	1	0	0	0	0	0	1	mod AS	Enterococcus faecalis	0	1	2024-04-29	2024-04-29	0	1	0	0	0	0	0	0	1	0	1	ampicillin	0	1	1	1	1	2024-04-29	0	1	0					0	TTE this adm takosubo CM w/ G1DD, didnt seem to care about the entoroccocus
65	2024-03-24	2024-04-06	13	54	2	2	0	0	0	0	0	0	0		Enterococcus faecalis	1	6	2024-03-24	2024-03-29	5	1	0	0	0	0	0	0	1	0	1	linezolid	0	1	0	1	1	2024-03-29	0	0	1	2024-04-01	0	0	1	0	changed to oral linezolid until 4/7/24 for tx completion, source UTI and had underlying malignancy
66	2024-05-21	2024-05-31	10	71	2	2	1	0	0	0	1	0	1	mod TR, G1DD	Vancomycin resistant Enterococcus faecalis	0	1	2024-05-21	2024-05-21	0	1	0	0	1	0	0	0	0	0	1	Daptomycin	1	0	1	1	1	2024-05-24	0	0	0					0	has PICC in from prev adm 4/24-5/10, PICC removed this adm and replaced, dapto replaced nafcillin
67	2024-04-16	2024-05-30	44	54	1	2	1	0	0	0	1	0	0		Enterococcus faecalis	1	5	2024-04-16	2024-04-19	3	1	0	0	1	0	1	0	0	0	1	ceftriaxone ampicillin	1	1	1	1	1	2024-04-19	0	0	0					0	souce poss from PICC or GI, had multiple bugs growing including fungemia, PICC removed and replaced
68	2024-06-01	2024-06-06	5	69	1	2	1	0	0	0	1	0	0		Staphylococcus epidermidis	0	1	2024-06-01	2024-06-01	0	0	0	0	0	0	0	0	0	0	1	levofloxacin	0	1	1	1	0				0					0	likely contaminent, on chemo via chest port for prostate ca
69	2024-06-04	2024-06-14	10	53	1	2	0	0	0	0	0	0	0		Staphylococcus epidermidis	0	1	2024-06-04	2024-06-04	0	0	0	0	0	0	0	0	0	0	1	vanc cefepime	0	0	1	1	0				0					0	likely contaminent, ED abx use
70	2024-06-06	2024-07-04	28	73	2	2	0	0	0	0	0	0	0		Staphylococcus saccarolyticus	0	1	2024-06-06	2024-06-06	0	1	0	0	0	0	0	0	0	1	1	vanc	0	0	1	0	1	2024-06-10	0	1	0					1	source maybe vasc graft for RLE ischemia, TTE this adm showed sev dec LV fxn 25-30% and Takosubo
71	2024-06-06	2024-06-14	8	69	1	2	1	0	0	0	0	0	1	G1DD	Staphylococcus pettenkoferi	0	1	2024-06-06	2024-06-06	0	0	0	0	0	0	0	0	0	0	1	ampicillin sulb	0	1	0	1	0				0					0	likely contaminent, central fever possibly 2 days after adm from strok prob
72	2024-06-10	2024-06-14	4	63	2	2	0	0	0	0	0	0	0		Staphylococcus epidermidis	0	1	2024-06-10	2024-06-10	0	0	0	0	0	0	0	0	0	0	1	vanc cefepime	0	0	1	1	0				0					0	likely contaminent, presented w/ sepsis pressure wound
73	2024-06-11	2024-06-21	10	76	2	2	0	0	0	0	0	0	0		Staphylococcus epidermidis	0	1	2024-06-11	2024-06-11	0	0	0	0	0	0	0	0	0	0	1	cefazolin ampicillin sulb	0	0	1	1	1	2024-06-12	0	0	0					0	contaminent, TTE not used for IE but for afib
74	2024-06-11	2024-06-20	9	80	1	3	1	0	0	0	1	0	1	G3DD	Staphylococcus pettenkoferi	0	1	2024-06-11	2024-06-11	0	1	0	0	1	0	0	0	0	0	1	vanc	0	0	1	1	1	2024-06-14	0	1	0					0	has midline cath, removed 6/14, TTE this adm showed mod MR, TR
75	2024-06-12	2024-06-20	8	81	1	3	0	0	0	0	0	0	0		Staphylococcus epidermidis	0	1	2024-06-12	2024-06-12	0	0	0	0	0	0	0	0	0	0	1	vanc cefepime	0	0	1	1	1	2024-06-13	0	0	0					1	contam, shock 2/2 poor PO intake momentarily, made comfort
76	2024-06-14	2024-06-25	11	59	1	3	0	0	0	0	0	0	0		Staphylococcus epidermidis	1	3	2024-06-14	2024-06-17	3	1	1	1	0	0	0	0	0	0	1	cefazolin	1	1	1	1	1	2024-06-18	0	0	1	2024-06-20	0	0	0	0
77	2024-06-17	2024-07-02	15	69	2	2	1	0	0	1	0	0	0		Staphylococcus hominis	0	1	2024-06-17	2024-06-17	0	0	0	0	0	0	0	0	0	0	1	cefazolin gentamycin rifampin	0	1	1	1	0				1	2024-06-19	0	0	0	0	went right to TEE, abx tx for presumed MSSE CIED endocarditis
78	2024-06-20	2024-06-23	3	77	2	3	0	0	0	0	0	0	0		Staphylococcus epidermidis	0	1	2024-06-20	2024-06-20	0	0	0	0	0	0	0	0	0	0	0		0	1	1	1	0				0					0	contam, had covid, no abx, pos bcx never addressed
79	2024-06-21	2024-06-27	6	58	2	2	0	0	0	0	0	0	1	mod MS	Staphylococcus epidermidis	0	1	2024-06-21	2024-06-21	0	0	0	0	0	0	0	0	0	0	1	ceftriaxone	0	0	1	0	1	2024-06-24	0	0	0					0	contam, tx for UTI, stroke may explain WBC, made comfort
80	2024-06-28	2024-07-12	14	68	2	2	1	0	0	0	0	0	1	G1DD	Staphylococcus epidermidis	0	1	2024-06-28	2024-06-28	0	0	0	0	0	0	0	0	0	0	1	cefazolin	0	0	1	1	1	2024-07-03	0	1	0					0	contam, TTE found G2DD
81	2024-05-02	2024-05-09	7	84	1	3	0	0	0	0	0	0	0		Staphylococcus epidermidis	0	1	2024-05-02	2024-05-02	0	0	0	0	0	0	0	0	0	0	1	vanc cefepime	0	0	1	1	0				0					0	contam
82	2024-04-29	2024-05-20	21	72	2	2	0	0	0	0	0	0	0		Staphylococcus epidermidis	0	1	2024-05-05	2004-05-05	-7305	0	0	0	0	0	0	0	0	0	1	vanc	0	1	1	1	1	2024-05-07	0	1	0					0	contam, TTE showed HFrEF
83	2024-05-06	2024-05-09	3	72	2	5	0	0	0	0	0	0	0		Staphylococcus epidermidis	0	1	2024-05-06	2024-05-06	0	0	0	0	0	0	0	0	0	0	1	vanc	0	0	1	1	0				0					0	contam
84	2024-05-06	2024-05-10	4	42	1	2	0	0	0	0	0	0	0		Staphylococcus epidermidis	0	1	2024-05-06	2024-05-06	0	0	0	0	0	0	0	0	0	0	1	vanc cefepime	0	0	1	1	0				0					0	contam
85	2024-05-07	2024-05-24	17	57	1	2	0	0	0	0	0	0	0		Staphylococcus capitis	0	1	2024-05-07	2024-05-07	0	0	0	0	0	0	0	0	0	0	1	ertapenenm	1	1	0	0	1	2024-05-20	0	0	0					0	contam, found to have liver abscess but not the source, tx 6 wks for abscess NOT IE
86	2024-05-09	2024-05-31	22	57	2	2	0	0	0	0	0	0	0		Staphylococcus epidermidis	0	1	2024-05-09	2024-05-09	0	0	0	0	0	0	0	0	0	0	1	vanc	0	1	0	1	1	2024-05-15	0	0	0					1	contam
87	2024-05-09	2024-05-13	4	74	1	2	0	0	0	0	0	0	0		Staphylococcus epidermidis	0	1	2024-05-09	2024-05-09	0	0	0	0	0	0	0	0	0	0	0		0	0	1	1	0				0					0	contam
88	2024-05-11	2024-05-15	4	90	2	2	1	0	1	0	0	0	1	sev AS s/p TAVR, G2DD	Staphylococcus epidermidis	0	1	2024-05-11	2024-05-11	0	0	0	0	0	0	0	0	0	0	0		0	0	1	1	1	2024-05-15	0	1	0					0	contam, TTE this adm showed mod MR
89	2024-05-11	2024-05-14	3	83	1	2	1	0	0	0	0	0	1	G3DD	Staphylococcus epidermidis	0	1	2024-05-11	2024-05-11	0	0	0	0	0	0	0	0	0	0	1	vanc	0	0	1	1	1	2024-05-14	0	0	0					0	contam
90	2024-05-13	2024-05-24	11	62	2	2	0	0	0	0	0	0	0		Staphylococcus epidermidis	0	1	2024-05-13	2024-05-13	0	0	0	0	0	0	0	0	0	0	1	vanc	0	0	1	1	0				0					0	contam
91	2024-05-13	2024-05-18	5	94	2	2	0	0	0	0	0	0	0		Staphylococcus epidermidis	0	1	2024-05-13	2024-05-13	0	0	0	0	0	0	0	0	0	0	1	ceftriaxone	0	0	1	1	1	2024-05-14	0	0	0					0	contam
92	2024-05-15	2024-05-18	3	79	1	4	1	0	0	0	0	0	1	HFrEF, mod MR	Staphylococcus hominis	0	1	2024-05-15	2024-05-15	0	0	0	0	0	0	0	0	0	0	1	vanc ceftriaxone	0	0	1	1	1	2024-05-17	0	0	0					0	contam
93	2024-05-18	2024-05-27	9	45	2	2	0	0	0	0	0	0	0		Staphylococcus haemolyticus	0	1	2024-05-18	2024-05-18	0	0	0	0	0	0	0	0	0	0	1	vanc	0	0	1	1	0				0					0	contam
94	2024-05-21	2024-05-28	7	75	1	2	0	0	0	0	0	0	0		Staphylococcus epidermidis	0	1	2024-05-21	2024-05-21	0	0	0	0	0	0	0	0	0	0	1	ceftriaxone	0	0	1	1	1	2024-05-28	0	0	0					0	contam
95	2024-05-22	2024-05-27	5	90	1	2	1	0	0	0	0	0	1	mod TR, sev biatrial enlarge	Staphylococcus epidermidis	1	2	2024-05-22	2024-05-22	0	0	0	0	0	0	0	0	0	0	1	cefepime	0	0	1	1	1	2024-05-24	0	0	0					0	contam
96	2024-05-23	2024-06-01	9	88	1	3	0	0	0	0	0	0	0		Staphylococcus pettenkoferi	0	1	2024-05-24	2024-05-24	0	0	0	0	0	0	0	0	0	0	1	vanc cefepime	0	0	1	1	0				0					0	contam
97	2024-05-26	2024-05-30	4	96	2	2	0	0	0	0	0	0	0		Staphylococcus capitis	0	1	2024-05-26	2024-05-26	0	0	0	0	0	0	0	0	0	0	1	vanc	0	0	1	1	0				0					0	contam
98	2024-05-27	2024-06-02	6	75	2	3	1	0	0	0	0	0	1	HFrEF, sev thickened MV AV	Staphylococcus epidermidis	0	1	2024-05-27	2024-05-27	0	0	0	0	0	0	0	0	0	0	1	vanc	0	0	1	1	1	2024-05-28	0	1	0					1	contam, TTE for ACS this adm showed mod MS MR, severe AS
99	2024-05-27	2024-06-10	14	72	1	2	0	0	0	0	0	0	0		Staphylococcus hominis	0	1	2024-05-27	2024-05-27	0	0	0	0	0	0	0	0	0	0	1	vanc	0	0	1	1	0				0					0	contam
100	2024-05-30	2024-05-31	1	39	1	3	0	0	0	0	0	0	0		Staphylococcus epidermidis	0	1	2024-05-30	2024-05-30	0	0	0	0	0	0	0	0	0	0	1	ceftriaxone	0	0	1	1	0				0					0	contam
101	2024-04-02	2024-04-10	8	90	2	2	1	0	0	1	0	0	1	mod MR	Staphylococcus epidermidis	0	1	2024-04-02	2024-04-02	0	0	0	0	0	0	0	0	0	0	1	ampicillin sulb	0	0	1	1	0				0					0	contam
102	2024-04-03	2024-04-07	4	92	2	2	0	0	0	0	0	0	0		Staphylococcus epidermidis	0	1	2024-04-03	2024-04-03	0	0	0	0	0	0	0	0	0	0	1	vanc cefepime	0	0	1	1	0				0					0	contam
103	2024-04-08	2024-07-15	98	51	1	2	1	0	0	0	1	0	1	HFrEF	Staphylococcus epidermidis	0	1	2024-04-08	2024-04-08	0	1	0	0	1	0	0	0	0	0	1	cefazolin	0	0	1	1	1	2024-04-09	0	0	0					1	contam, PICC for TPN that was NOT removed this adm, was growing fungemia way later in the adm
104	2024-04-10	2024-04-12	2	32	1	2	0	0	0	0	0	0	0		Staphylococcus epidermidis	0	1	2024-04-10	2024-04-10	0	0	0	0	0	0	0	0	0	0	0		0	0	1	1	0				0					0	contam
105	2024-04-13	2024-04-19	6	81	2	2	0	0	0	0	0	0	1	G1DD	Staphylococcus epidermidis	0	1	2024-04-13	2024-04-13	0	1	0	0	0	0	0	0	1	0	1	vanc	0	0	1	1	1	2024-04-17	0	0	0					0	Ucx also grew s.epi
106	2024-04-14	2024-04-30	16	66	1	2	0	0	0	0	0	0	0		Staphylococcus haemolyticus	1	2	2024-04-14	2024-04-15	1	0	0	0	0	0	0	0	0	0	1	vanc	0	1	1	1	1	2024-04-19	0	0	0					0	contam
107	2024-04-16	2024-04-19	3	79	1	2	1	0	1	0	0	0	1	G1DD, s/p TAVR	Staphylococcus epidermidis	0	1	2024-04-16	2024-04-16	0	0	0	0	0	0	0	0	0	0	1	ceftriaxone	0	0	1	1	1	2024-04-18	0	0	0					0	contam
108	2024-04-16	2024-04-30	14	78	2	2	1	0	1	0	0	0	1	G2DD, s/p TAVR	Staphylococcus epidermidis	1	4	2024-04-16	2024-04-22	6	0	0	0	0	0	0	0	0	0	1	vanc	1	1	1	1	1	2024-04-17	0	1	1	2024-04-22	1	1	0	0	TEE this adm showed mod-sev MR, they did x2 more TTE's after TEE to assess clinically, consulted CT sx but they rec IV abx
109	2024-03-14	2024-05-08	55	38	1	2	0	0	0	0	0	0	0		Staphylococcus epidermidis	0	1	2024-04-18	2024-04-18	0	0	0	0	0	0	0	0	0	0	1	vanc	0	1	1	1	0				0					1	contam, TTE done before positve bcx due to shock and PE, level 1 trauma
110	2024-04-20	2024-04-26	6	86	2	2	0	0	0	0	0	0	0		Staphylococcus hominis	0	1	2024-04-20	2024-04-20	0	0	0	0	0	0	0	0	0	0	1	vanc	0	1	1	1	0				0					0	contam
111	2024-04-23	2024-05-01	8	58	2	2	1	0	0	0	0	0	1	G1DD, mod TR	Staphylococcus haemolyticus	0	1	2024-04-23	2024-04-23	0	0	0	0	0	0	0	0	0	0	1	vanc	0	0	1	1	0				0					0	contam
112	2024-04-24	2024-04-30	6	28	1	2	0	0	0	0	0	0	0		Staphylococcus capitis	0	1	2024-04-24	2024-04-24	0	0	0	0	0	0	0	0	0	0	1	vanc	0	0	1	1	0				0					0	contam
113	2024-04-25	2024-05-19	24	89	2	3	0	0	0	0	0	0	0		Staphylococcus hominis	0	1	2024-04-25	2024-04-25	0	0	0	0	0	0	0	0	0	0	1	cefepime	0	0	1	1	1	2024-05-07	0	1	0					0	contam, TTE this adm G2DD
114	2024-04-26	2024-05-17	21	88	2	2	1	0	0	1	0	0	1	mod TR	Staphylococcus epidermidis	0	1	2024-04-26	2024-04-26	0	0	0	0	0	0	0	0	0	0	1	vanc meropenem	0	0	1	0	1	2024-05-07	0	1	0					0	contam
115	2024-04-27	2024-05-01	4	43	2	2	1	0	0	0	0	0	1	MVP s/p repair	Staphylococcus capitis	0	1	2024-04-27	2024-04-27	0	0	0	0	0	0	0	0	0	0	1	vanc	0	0	1	1	1	2024-04-29	0	0	0					0	contam
116	2024-04-30	2024-05-07	7	92	1	2	0	0	0	0	0	0	0		Staphylococcus capitis	0	1	2024-04-30	2024-04-30	0	0	0	0	0	0	0	0	0	0	1	vanc cefepime	0	0	1	1	0				0					0	contam, hospice
117	2024-03-01	2024-03-08	7	82	2	2	0	0	0	0	0	0	0		Staphylococcus capitis	0	1	2024-03-01	2024-03-01	0	0	0	0	0	0	0	0	0	0	1	ceftriaxone	0	0	1	1	0				0					0	contam, hospice
118	2024-03-02	2024-03-09	7	44	2	3	1	0	0	0	1	0	0		Staphylococcus hominis	0	1	2024-03-02	2024-03-02	0	0	0	0	0	0	0	0	0	0	1	vanc	0	1	1	1	0				0					0	contam, had chest port for chemo for breast ca
119	2024-03-03	2024-03-14	11	65	1	2	0	0	0	0	0	0	0		Staphylococcus epidermidis	0	1	2024-03-03	2024-03-03	0	0	0	0	0	0	0	0	0	0	1	doxycycline	0	0	1	1	1	2024-03-06	0	0	0					0	contam
120	2024-03-03	2024-03-07	4	77	2	3	0	0	0	0	0	0	0		Staphylococcus capitis	0	1	2024-03-03	2024-03-03	0	0	0	0	0	0	0	0	0	0	1	vanc	0	1	1	1	1	2024-03-06	0	0	0					0	contam
121	2024-03-05	2024-03-12	7	70	1	2	0	0	0	0	0	0	0		Staphylococcus epidermidis	0	1	2024-03-05	2024-03-05	0	0	0	0	0	0	0	0	0	0	1	vanc cefepime	0	0	1	1	1	2024-03-11	0	1	0					0	contam, TTE this adm mod TR
122	2024-03-06	2024-03-09	3	70	1	3	0	0	0	0	0	0	0		Staphylococcus hominis	0	1	2024-03-06	2024-03-06	0	0	0	0	0	0	0	0	0	0	1	ceftriaxone	0	0	1	1	0				0					0	contam, covid positve
123	2024-03-08	2024-03-11	3	75	1	3	1	0	0	0	0	0	1	G1DD	Staphylococcus hominis	0	1	2024-03-08	2024-03-08	0	0	0	0	0	0	0	0	0	0	1	ceftriaxone	0	0	1	1	1	2024-03-10	0	1	0					0	contam, TTE done for pericardial effusion which is new
124	2024-03-08	2024-03-11	3	60	2	3	0	0	0	0	0	0	0		Staphylococcus hominis	0	1	2024-03-08	2024-03-08	0	0	0	0	0	0	0	0	0	0	1	ceftriaxone	0	0	1	1	0				0					0	contam
125	2024-03-10	2024-03-22	12	71	1	2	1	0	0	0	1	0	0		Staphylococcus epidermidis	0	1	2024-03-10	2024-03-10	0	1	0	0	1	0	0	0	0	0	1	linezolid levofloxacin	0	1	1	1	1	2024-03-11	0	0	0					0	poss PICC source
126	2024-03-11	2024-03-16	5	80	2	2	1	0	0	0	0	0	1	G1DD	Staphylococcus hominis	0	1	2024-03-11	2024-03-11	0	0	0	0	0	0	0	0	0	0	1	cefuroxime	0	1	1	0	1	2024-03-15	0	0	0					0	contam
127	2024-03-11	2024-03-19	8	61	1	3	0	0	0	0	0	0	0		Staphylococcus hominis	0	1	2024-03-11	2024-03-11	0	0	0	0	0	0	0	0	0	0	1	cefepime	0	1	1	1	1	2024-03-13	0	0	0					0	contam
128	2024-03-14	2024-03-26	12	54	1	2	1	0	0	0	1	0	0		Staphylococcus epidermidis	0	1	2024-03-14	2024-03-14	0	1	0	0	1	0	0	0	0	0	1	daptomycin	0	1	1	1	1	2024-03-19	0	0	0					0	poss PICC source, removed and replaced
129	2024-03-14	2024-03-27	13	74	1	2	0	0	0	0	0	0	0		Staphylococcus epidermidis	0	1	2024-03-14	2024-03-14	0	0	0	0	0	0	0	0	0	0	1	vanc cefepime	0	0	1	0	0				0					0	contam
130	2024-03-16	2024-03-19	3	53	1	5	0	0	0	0	0	0	0		Staphylococcus epidermidis	0	1	2024-03-16	2024-03-16	0	0	0	0	0	0	0	0	0	0	1	ceftriaxone	0	0	1	1	0				0					0	contam
131	2024-03-17	2024-03-25	8	23	2	2	0	0	0	0	0	0	0		Staphylococcus epidermidis	0	1	2024-03-17	2024-03-17	0	0	0	0	0	0	0	0	0	0	1	vanc	0	1	0	1	1	2024-03-22	0	0	0					0	contam
132	2024-03-12	2024-04-19	38	41	1	3	1	0	0	0	1	0	0		Staphylococcus epidermidis	0	1	2024-03-19	2024-03-19	0	1	0	0	1	0	0	0	0	0	1	vanc	1	1	1	1	1	2024-03-21	0	0	0					0	source likely chemoport c/b nosocomial infx
133	2024-03-21	2024-03-26	5	73	2	2	1	0	0	0	1	0	0		Staphylococcus hominis	0	1	2024-03-21	2024-03-21	0	0	0	0	0	0	0	0	0	0	1	vanc cefepime	0	1	1	1	0				0					0	contam, has chestport for chemo
134	2024-03-27	2024-04-05	9	59	2	2	0	0	0	0	0	0	0		Staphylococcus epidermidis	0	1	2024-03-27	2024-03-27	0	0	0	0	0	0	0	0	0	0	1	ceftriaxone	0	1	1	1	0				0					0	contam

## Sheet: Modified Gen Analysis
Subject #	Admission Date	Discharge Date	LOS	Age	Sex	Race	Comorbidity present (at least 1)?	IVDU	Prosthetic Valve	Intracardiac device	Chronic in-line cath	Previous IE	Cardio-structural abnormality	Type of abnormality	Bcx initial	Staph aureus	Viridans	Enterococcus	CoNS	Bcx repeat positive?	Total sets of positive Bcx	Date initial positive Bcx	Date last positive Bcx	Days bcx positive	Alternative source of infx?	OM?	Cellulitis or open wound?	Line related?	Abscess?	Intra-abdominal?	PNA?	UTI?	Other	Abx used?	Abx tx? (ended w/)	Planned longterm abx tx (~4-6wks) +/- PICC?	fever?	< 3 days defervescence or remained afebrile?	defervesced	not defervesced	remained afebrile	WBC downtrend or remained nrml?	TTE used?	TTE date	TTE new valvular veg?	TTE new worsened fxnl findings from previous TTEs?	Time to TTE	TEE used?	TEE date
1	2024-05-30	2024-06-19	20	85	1	2	1	0	1	1	0	0	1	mod TR, MR, AS w/ TAVR, CABG 2000	Methicillin-Resistant Staphylococcus aureus	1	0	0	0	1	11	2024-05-30	2024-06-12	13	0	0	0	0	0	0	0	0	0	1	Daptomycin	1	0	1	0	0	1	1	1	2024-05-31	0	0	1	1	2024-06-03
2	2024-06-03			78	1	3	0	0	0	0	0	0	0		Methicillin-Resistant Staphylococcus aureus	1	0	0	0	1	6	2024-06-03	2024-06-07	4	1	1	0	0	0	0	0	0	0	1	Daptomycin	1	1	1	1	0	0	1	1	2024-06-05	0	0	2	0
3	2024-06-05	2024-06-22	17	62	1	2	1	0	0	0	0	0	1	thickened AV leaf	Staphylococcus aureus	1	0	0	0	1	5	2024-06-05	2024-06-11	6	0	0	0	0	0	0	0	0	1	1	Ertapenem nafcillin	0	1	0	0	1	0	1	1	2024-06-05	0	0	0	1	2024-06-12
4	2024-06-06	2024-06-12	6	77	1	2	0	0	0	0	0	0	0		Staphylococcus aureus	1	0	0	0	1	2	2024-06-06	2024-06-07	1	1	0	0	0	0	0	0	1	1	1	cefazolin	0	1	1	1	0	0	1	1	2024-06-07	0	0	1	1	2024-06-10
5	2024-06-10	2024-06-13	3	71	1	2	1	0	0	0	1	1	1	G3DD, sev LA dilation	Staphylococcus aureus	1	0	0	0	1	2	2024-06-10	2024-06-11	1	1	0	0	0	1	0	0	0	0	1	vanc zosyn	1	1	1	1	0	0	0	1	2024-06-11	1	1	1	0
6	2024-06-11	2024-06-22	11	81	1	2	1	0	0	0	0	0	1	mod MR, TR, sev biatrial enlarge	Staphylococcus aureus	1	0	0	0	1	4	2024-06-11	2024-06-15	4	1	0	1	0	0	1	0	0	0	1	Ertapenem cefazolin	0	1	1	1	0	0	0	1	2024-06-12	0	0	1	0
7	2024-06-10	2024-07-12	32	45	2	2	0	0	0	0	0	0	0		Staphylococcus aureus	1	0	0	0	0	1	2024-06-12	2024-06-12	0	0	0	0	0	0	0	0	0	0	1	cefazolin	1	0	1	0	0	1	1	1	2024-06-14	0	0	4	0
8	2024-06-13	2024-06-23	10	60	1	3	1	0	0	0	0	0	1	G2DD	Staphylococcus aureus	1	0	0	0	1	2	2024-06-13	2024-06-14	1	1	0	0	0	1	0	0	0	0	1	cefazolin	1	1	1	1	0	0	1	1	2024-06-14	0	0	1	0
9	2024-06-15	2024-06-27	12	64	2	2	1	0	0	0	1	0	0		Staphylococcus aureus	1	0	0	0	1	2	2024-06-20	2024-06-21	1	1	0	1	0	0	0	0	0	0	1	cefazolin	1	1	1	1	0	0	1	1	2024-06-24	0	0	9	0
10	2024-06-25	2024-07-02	7	46	1	2	1	1	0	0	1	1	1	1/4/24 veg seen, sev TR,	Methicillin-Resistant Staphylococcus aureus	1	0	0	0	1	5	2024-06-25	2024-06-30	5	1	1	1	0	1	0	0	0	0	1	Daptomycin	1	1	1	1	0	0	1	1	2024-06-25	1	1	0	0
11	2024-06-27	2024-07-28	31	74	1	2	1	0	0	0	0	0	1	sev calc AV, mod AS, mod TR	Staphylococcus aureus	1	0	0	0	0	1	2024-06-27	2024-06-27	0	1	0	1	0	0	0	1	0	0	1	vanc cefepime	0	1	1	1	0	0	0	1	2024-06-28	0	1	1	0
12	2024-05-01	2024-05-11	10	70	1	5	1	0	0	0	1	0	1	G1DD	Staphylococcus aureus	1	0	0	0	1	2	2024-05-01	2024-05-03	2	1	0	0	1	0	0	0	0	0	1	cefazolin	1	1	1	1	0	0	1	1	2024-05-07	0	1	6	0
13	2024-05-02	2024-05-24	22	91	2	2	1	0	0	0	0	0	1	HFrEF	Staphylococcus aureus	1	0	0	0	1	2	2024-05-02	2024-05-03	1	1	0	0	0	1	0	0	0	0	1	cefazolin	1	1	1	1	0	0	1	1	2024-05-06	0	0	4	0
14	2024-05-07	2024-05-21	14	71	2	2	1	0	0	0	1	0	0		Staphylococcus aureus	1	0	0	0	1	3	2024-05-07	2024-05-10	3	1	0	1	1	0	0	0	0	0	1	cefazolin	1	1	0	0	1	0	1	1	2024-05-08	0	0	1	0
15	2024-05-08	2024-05-20	12	77	1	2	1	0	0	0	0	0	1	at least mod TR'	Staphylococcus aureus	1	0	0	0	0	1	2024-05-08	2024-05-08	0	1	0	0	0	1	0	0	1	0	1	cefazolin	1	1	1	1	0	0	1	1	2024-05-09	0	0	1	1	2024-05-13
16	2024-05-08	2024-05-23	15	83	2	2	1	0	0	0	0	0	1	PFO, sev biatrial enlarge, G1DD, mod LVH	Staphylococcus aureus	1	0	0	0	1	3	2024-05-17	2024-05-19	2	0	0	0	0	0	0	0	0	0	1	nafcillin	1	1	1	1	0	0	1	1	2024-05-20	0	0	12	0
17	2024-05-26	2024-06-15	20	59	1	3	1	0	0	0	0	0	1	G1DD, mod mitral annular calc	Staphylococcus aureus	1	0	0	0	1	2	2024-05-28	2024-05-29	1	1	0	1	0	0	0	0	0	0	1	cefazolin	1	1	1	1	0	0	1	1	2024-05-30	1	0	4	0
18	2024-04-03	2024-04-13	10	51	1	3	0	0	0	0	0	0	0		Staphylococcus aureus	1	0	0	0	1	3	2024-04-03	2024-04-06	3	1	1	0	0	0	0	0	0	0	1	cefazolin	1	1	1	1	0	0	1	1	2024-04-05	0	0	2	1	2024-04-09
19	2024-04-11	2024-04-16	5	65	2	2	1	0	0	0	0	0	1	thickened AV leaf	Methicillin-Resistant Staphylococcus aureus	1	0	0	0	1	3	2024-04-11	2024-04-12	1	0	0	0	0	0	0	0	0	1	1	Daptomycin	1	0	1	0	0	1	1	1	2024-04-12	0	1	1	0
20	2024-04-10	2024-04-19	9	85	1	2	0	0	0	0	0	0	0		Staphylococcus aureus	1	0	0	0	1	2	2024-04-14	2024-04-14	0	0	0	0	0	0	0	0	0	0	1	cefazolin	1	1	1	1	0	0	1	1	2024-04-18	0	0	8	0
21	2024-04-18	2024-04-26	8	85	2	2	1	0	0	0	0	0	1	G1DD	Staphylococcus aureus	1	0	0	0	1	3	2024-04-18	2024-04-20	2	1	0	0	0	1	0	0	0	0	1	cefazolin	1	1	0	0	1	0	1	1	2024-04-22	0	1	4	0
22	2024-04-19	2024-04-26	7	79	1	2	1	0	0	1	0	0	1	G2DD	Staphylococcus aureus	1	0	0	0	1	1	2024-04-19	2024-04-19	0	0	0	0	0	0	0	0	0	1	1	cefazolin	1	1	1	1	0	0	0	1	2024-04-24	0	0	5	1	2024-04-26
23	2024-04-19	2024-06-04	46	46	2	2	1	1	0	0	1	0	0		Methicillin-Resistant Staphylococcus aureus	1	0	0	0	1	3	2024-04-19	2024-04-22	3	1	0	0	1	0	0	0	0	0	1	vanc	1	0	1	0	0	1	1	1	2024-04-24	0	0	5	1	2024-04-26
24	2024-04-20	2024-04-30	10	87	2	2	1	0	0	0	0	0	1	mod MS, G1DD	Staphylococcus aureus	1	0	0	0	1	2	2024-04-20	2024-04-21	1	0	0	0	0	0	0	0	0	0	1	cefazolin	1	1	1	1	0	0	1	1	2024-04-24	0	0	4	1	2024-04-29
25	2024-04-23	2024-05-11	18	66	1	2	1	0	0	0	0	0	1	G2DD	Staphylococcus aureus	1	0	0	0	1	4	2024-04-23	2024-04-26	3	1	1	0	0	1	0	0	0	0	1	cefazolin	1	0	1	0	0	1	0	1	2024-04-29	0	0	6	0
26	2024-04-24	2024-05-12	18	59	2	2	1	0	0	0	1	0	1	G1DD	Staphylococcus aureus	1	0	0	0	1	3	2024-04-24	2024-04-27	3	1	0	0	1	0	0	0	0	0	1	cefazolin	1	1	1	1	0	0	1	1	2024-05-03	1	0	9	0
27	2024-04-21	2024-04-30	9	72	1	2	1	0	0	0	0	0	1	anterolat hypokinesis, apical kinesis, HFmrEF	Staphylococcus aureus	1	0	0	0	1	2	2024-04-25	2024-04-27	2	1	1	0	0	0	0	0	0	1	1	cefazolin	1	1	1	1	0	0	1	1	2024-04-26	0	0	5	0
28	2024-04-24	2024-05-10	16	71	2	2	1	0	0	0	0	0	1	mod TR, G1DD	Staphylococcus aureus	1	0	0	0	1	2	2024-04-27	2024-04-28	1	1	1	0	0	1	0	0	0	1	1	nafcillin	1	1	1	1	0	0	1	1	2024-05-02	0	0	8	0
29	2024-02-25	2024-06-11	107	54	1	3	0	0	0	0	0	0	0		Methicillin-Resistant Staphylococcus aureus	1	0	0	0	1	4	2024-04-25	2024-04-28	3	1	0	1	0	0	0	0	0	0	1	vanc	1	1	0	0	1	0	1	1	2024-04-29	0	0	64	0
30	2024-02-29	2024-03-28	28	28	2	2	1	1	0	0	0	0	0		Methicillin-Resistant Staphylococcus aureus	1	0	0	0	1	3	2024-02-29	2024-03-02	2	1	0	0	0	0	0	1	0	0	1	vanc	1	1	0	0	1	0	1	1	2024-03-01	0	1	1	1	2024-03-14
31	2024-02-21	2024-03-17	25	82	1	2	1	0	0	0	1	0	1	sev AS	Staphylococcus aureus	1	0	0	0	1	2	2024-02-29	2024-03-01	1	1	0	0	1	0	0	0	1	0	1	vanc	1	0	1	0	0	1	0	1	2024-03-01	0	1	9	0
32	2024-03-04	2024-03-27	23	79	2	2	1	0	0	0	0	0	1	G3DD, mod RV dilation	Methicillin-Resistant Staphylococcus aureus	1	0	0	0	1	5	2024-03-04	2024-03-08	4	0	0	0	0	0	0	0	0	0	1	Daptomycin	1	1	1	1	0	0	1	1	2024-03-06	0	0	2	1	2024-03-13
33	2024-03-05	2024-04-01	27	77	2	3	1	0	0	1	0	0	1	sev biatrial enlarge, mod TR	Staphylococcus aureus	1	0	0	0	1	3	2024-03-13	2024-03-15	2	0	0	0	0	0	0	0	0	0	1	cefazolin	1	0	1	0	0	1	1	1	2024-03-14	0	0	9	1	2024-03-15
34	2024-03-13	2024-03-26	13	95	2	4	0	0	0	0	0	0	0		Staphylococcus aureus	1	0	0	0	1	5	2024-03-13	2024-03-17	4	1	0	0	0	0	0	0	0	1	1	cefazolin	1	1	1	1	0	0	1	1	2024-03-15	0	0	2	0
35	2024-04-08	2024-05-13	35	42	2	4	1	1	0	0	0	0	0		Methicillin-Resistant Staphylococcus aureus	1	0	0	0	1	5	2024-04-11	2024-04-16	5	1	1	1	0	0	0	0	0	0	1	Daptomycin	1	1	0	0	1	0	1	1	2024-04-15	0	0	7	1	2024-04-15
36	2024-03-27	2024-03-29	2	64	2	2	1	0	0	0	0	0	1	G2DD	Staphylococcus aureus	1	0	0	0	1	3	2024-03-27	2024-03-28	1	0	0	0	0	0	0	0	0	0	1	cefazolin	1	1	1	1	0	0	0	1	2024-03-28	1	1	1	0
37	2024-03-28	2024-04-08	11	87	2	2	1	0	0	1	0	0	0	HFrEF	Staphylococcus aureus	1	0	0	0	1	4	2024-03-28	2024-03-31	3	0	0	0	0	0	0	0	0	0	1	nafcillin	1	1	0	0	1	0	0	1	2024-04-01	0	0	4	0
38	2024-03-30	2024-04-30	31	69	2	3	0	0	0	0	0	0	0		Methicillin-Resistant Staphylococcus aureus	1	0	0	0	0	1	2024-03-30	2024-03-30	0	0	0	0	0	0	0	0	0	0	1	Daptomycin	1	1	1	1	0	0	1	1	2024-04-01	0	1	2	1	2024-04-03
39	2024-05-31	2024-06-12	12	70	2	2	0	0	0	0	0	0	0		Streptococcus mutans	0	1	0	0	0	1	2024-06-01	2024-06-01	0	1	1	0	0	0	0	0	0	0	1	ceftriaxone	1	1	1	1	0	0	1	1	2024-06-05	0	1	5	0
40	2024-06-06	2024-06-10	4	78	2	2	1	0	0	0	1	0	0		Streptococcus mitis group	0	1	0	0	0	1	2024-06-06	2024-06-06	0	1	0	0	0	0	0	0	0	1	1	ceftriaxone	0	1	1	1	0	0	1	0					0
41	2024-06-07	2024-06-13	6	71	1	2	1	0	1	0	0	0	0		Streptococcus gordonii	0	1	0	0	0	1	2024-06-07	2024-06-07	0	0	0	0	0	0	0	0	0	0	1	ceftriaxone	1	1	1	1	0	0	1	1	2024-06-10	0	0	3	1	2024-06-12
42	2024-06-12	2024-06-19	7	83	1	5	0	0	0	0	0	0	0		Streptococcus mitis group	0	1	0	0	0	1	2024-06-12	2024-06-12	0	1	0	0	0	1	0	0	0	0	1	ceftriaxone	1	1	1	1	0	0	1	1	2024-06-14	1	0	2	0
43	2024-06-17	2024-06-22	5	65	1	3	0	0	0	0	0	0	0		Streptococcus mitis group	0	1	0	0	0	1	2024-06-17	2024-06-17	0	1	0	0	0	0	0	1	0	0	1	ceftriaxone	0	0	1	0	0	1	1	1	2024-06-20	0	1	3	0
44	2024-06-30	2024-07-10	10	55	2	2	1	0	0	0	1	0	0		Streptococcus constellatus	0	1	0	0	0	1	2024-06-30	2024-06-30	0	0	0	0	0	0	0	0	0	0	1	levofloxacin	0	1	0	0	1	0	1	1	2024-07-02	0	0	2	0
45	2024-05-09	2024-05-14	5	58	1	3	0	0	0	0	0	0	1	sev MR	Streptococcus mutans	0	1	0	0	0	1	2024-05-09	2024-05-09	0	1	0	0	0	0	0	0	0	1	1	ceftriaxone gentamycin	0	1	1	1	0	0	1	1	2024-05-10	0	0	1	1	2024-05-13
46	2024-05-16	2024-06-05	20	77	1	2	0	0	0	0	0	0	0		Streptococcus mitis group	0	1	0	0	0	1	2024-05-17	2024-05-17	0	1	0	0	0	0	0	0	0	1	1	vanc	1	1	0	0	1	0	0	1	2024-05-21	0	0	5	1	2024-05-22
47	2024-05-21	2024-06-04	14	75	1	2	0	0	0	0	0	0	0		Streptococcus mitis group	0	1	0	0	0	1	2024-05-21	2024-05-21	0	0	0	0	0	0	0	0	0	0	1	ceftriaxone	0	0	1	0	0	1	1	1	2024-05-24	0	0	3	0
48	2024-05-29	2024-06-05	7	54	1	3	0	0	0	0	0	0	0		Streptococcus constellatus	0	1	0	0	0	1	2024-05-29	2024-05-29	0	1	0	0	0	0	1	0	0	0	1	amoxicillin clav	0	0	1	0	0	1	1	0					0
49	2024-04-13	2024-05-08	25	78	2	2	0	0	0	0	0	0	0		Streptococcus anginosus	0	1	0	0	0	1	2024-04-13	2024-04-13	0	1	0	0	0	0	0	0	0	1	1	meropenem	1	1	0	0	1	0	0	1	2024-04-20	0	0	7	0
50	2024-04-27	2024-05-23	26	36	1	3	0	0	0	0	0	0	0		Streptococcus constellatus	0	1	0	0	0	1	2024-04-27	2024-04-27	0	1	0	0	0	1	1	0	0	0	1	ceftriaxone	1	1	1	1	0	0	0	1	2024-05-01	0	0	4	0
51	2024-04-28	2024-05-03	5	95	2	2	0	0	0	0	0	0	0		Streptococcus mitis group	0	1	0	0	0	1	2024-04-28	2024-04-28	0	0	0	0	0	0	0	0	0	0	1	ceftriaxone	0	0	1	0	0	1	1	1	2024-05-02	0	0	4	0
52	2024-03-05	2024-03-15	10	42	1	2	1	0	0	0	0	0	1	bicuspid AV and AS	Streptococcus gordonii	0	1	0	0	1	2	2024-03-05	2024-03-06	1	0	0	0	0	0	0	0	0	0	1	ceftriaxone	1	1	1	1	0	0	1	1	2024-03-06	1	1	1	1	2024-03-08
53	2024-03-06	2024-04-03	28	37	2	2	0	0	0	0	0	0	0		Streptococcus anginosus	0	1	0	0	0	1	2024-03-06	2024-03-06	0	1	0	1	0	1	0	0	0	0	1	cefazolin levofloxacin	1	1	1	1	0	0	1	1	2024-03-08	0	0	2	0
54	2024-03-08	2024-03-15	7	86	1	2	0	0	0	0	0	0	1	G1DD, mod AS	Streptococcus mutans	0	1	0	0	0	1	2024-03-08	2024-03-08	0	1	0	0	0	0	0	0	1	0	1	amoxicillin	0	0	1	0	0	1	1	1	2024-03-12	0	1	4	0
55	2024-03-18	2024-03-26	8	74	2	2	0	0	0	0	0	0	1	G1DD	Streptococcus mitis group	0	1	0	0	0	1	2024-03-18	2024-03-18	0	1	0	0	0	1	0	0	0	1	1	ceftriaxone	1	0	1	0	0	1	1	0					0
56	2024-06-15	2024-06-24	9	87	2	5	0	0	0	0	0	0	0	G1DD	Enterococcus faecalis	0	0	1	0	1	2	2024-06-14	2024-06-15	1	1	0	0	0	0	0	0	1	0	1	amoxicillin	0	1	1	1	0	0	1	1	2024-06-19	0	0	4	0
57	2024-06-16			55	2	2	1	0	0	1	0	0	1	HCM	Enterococcus faecalis	0	0	1	0	1	4	2024-06-26	2024-06-29	3	0	0	0	0	0	0	0	0	0	1	ceftriaxone ampicillin	1	1	1	1	0	0	1	1	2024-07-12	0	1	26	0
58	2024-06-26	2024-07-11	15	86	2	2	1	0	0	1	0	0	0		Enterococcus faecalis	0	0	1	0	0	1	2024-06-28	2024-06-28	0	1	0	0	0	0	0	0	1	0	1	amoxicillin	0	1	1	1	0	0	1	1	2024-07-01	0	1	5	0
59	2024-05-09	2024-05-16	7	77	2	5	0	0	0	0	1	0	1	G1DD	Vancomycin resistant Enterococcus faecalis	0	0	1	0	1	4	2024-05-09	2024-05-16	7	1	0	0	1	0	1	0	0	0	1	Daptomycin	1	0	1	0	0	1	0	1	2024-05-13	0	0	4	0
60	2024-05-13	2024-06-01	19	81	1	2	1	0	0	1	0	0	1	HFrEF	Enterococcus faecalis	0	0	1	0	1	2	2024-05-13	2024-05-14	1	1	0	0	0	0	1	0	0	0	1	ceftriaxone ampicillin	1	1	1	1	0	0	1	1	2024-05-17	0	1	4	0
61	2024-03-30	2024-04-05	6	87	2	3	1	0	0	1	0	0	1	G1DD, mod TR	Enterococcus faecalis	0	0	1	0	1	3	2024-03-31	2024-04-02	2	0	0	0	0	0	0	0	0	0	1	piperacillin tazo	1	0	1	0	0	1	1	1	2024-04-01	0	1	2	0
62	2024-04-16	2024-04-21	5	47	1	2	1	1	0	0	0	0	1	sev TR	Enterococcus faecalis	0	0	1	0	1	4	2024-04-16	2024-04-21	5	1	0	1	0	0	0	0	0	0	1	ceftriaxone ampicillin	1	1	1	1	0	0	1	1	2024-04-18	1	0	2	0
63	2024-04-16	2024-05-30	44	54	1	2	1	0	0	0	1	0	0		Enterococcus faecalis	0	0	1	0	1	5	2024-04-16	2024-04-19	3	1	0	0	1	0	0	0	0	0	1	ceftriaxone ampicillin	1	1	1	1	0	0	1	1	2024-04-19	0	0	3	0
64	2024-04-27	2024-05-07	10	82	1	2	1	0	0	0	0	0	1	mod AS	Enterococcus faecalis	0	0	1	0	0	1	2024-04-29	2024-04-29	0	1	0	0	0	0	0	0	1	0	1	ampicillin	0	1	1	1	0	0	1	1	2024-04-29	0	1	2	0
65	2024-03-24	2024-04-06	13	54	2	2	0	0	0	0	0	0	0		Enterococcus faecalis	0	0	1	0	1	6	2024-03-24	2024-03-29	5	1	0	0	0	0	0	0	1	0	1	linezolid	0	1	0	0	1	0	1	1	2024-03-29	0	0	5	1	2024-04-01
66	2024-05-21	2024-05-31	10	71	2	2	1	0	0	0	1	0	1	mod TR, G1DD	Vancomycin resistant Enterococcus faecalis	0	0	1	0	0	1	2024-05-21	2024-05-21	0	1	0	0	1	0	0	0	0	0	1	Daptomycin	1	0	1	0	0	1	1	1	2024-05-24	0	0	3	0
67	2024-04-16	2024-05-30	44	54	1	2	1	0	0	0	1	0	0		Enterococcus faecalis	0	0	1	0	1	5	2024-04-16	2024-04-19	3	1	0	0	1	0	1	0	0	0	1	ceftriaxone ampicillin	1	1	1	1	0	0	1	1	2024-04-19	0	0	3	0
68	2024-06-01	2024-06-06	5	69	1	2	1	0	0	0	1	0	0		Staphylococcus epidermidis	0	0	0	1	0	1	2024-06-01	2024-06-01	0	0	0	0	0	0	0	0	0	0	1	levofloxacin	0	1	1	1	0	0	1	0					0
69	2024-06-04	2024-06-14	10	53	1	2	0	0	0	0	0	0	0		Staphylococcus epidermidis	0	0	0	1	0	1	2024-06-04	2024-06-04	0	0	0	0	0	0	0	0	0	0	1	vanc cefepime	0	0	1	0	0	1	1	0					0
70	2024-06-06	2024-07-04	28	73	2	2	0	0	0	0	0	0	0		Staphylococcus saccarolyticus	0	0	0	1	0	1	2024-06-06	2024-06-06	0	1	0	0	0	0	0	0	0	1	1	vanc	0	0	1	0	0	1	0	1	2024-06-10	0	1	4	0
71	2024-06-06	2024-06-14	8	69	1	2	1	0	0	0	0	0	1	G1DD	Staphylococcus pettenkoferi	0	0	0	1	0	1	2024-06-06	2024-06-06	0	0	0	0	0	0	0	0	0	0	1	ampicillin sulb	0	1	0	0	1	0	1	0					0
72	2024-06-10	2024-06-14	4	63	2	2	0	0	0	0	0	0	0		Staphylococcus epidermidis	0	0	0	1	0	1	2024-06-10	2024-06-10	0	0	0	0	0	0	0	0	0	0	1	vanc cefepime	0	0	1	0	0	1	1	0					0
73	2024-06-11	2024-06-21	10	76	2	2	0	0	0	0	0	0	0		Staphylococcus epidermidis	0	0	0	1	0	1	2024-06-11	2024-06-11	0	0	0	0	0	0	0	0	0	0	1	cefazolin ampicillin sulb	0	0	1	0	0	1	1	1	2024-06-12	0	0	1	0
74	2024-06-11	2024-06-20	9	80	1	3	1	0	0	0	1	0	1	G3DD	Staphylococcus pettenkoferi	0	0	0	1	0	1	2024-06-11	2024-06-11	0	1	0	0	1	0	0	0	0	0	1	vanc	0	0	1	0	0	1	1	1	2024-06-14	0	1	3	0
75	2024-06-12	2024-06-20	8	81	1	3	0	0	0	0	0	0	0		Staphylococcus epidermidis	0	0	0	1	0	1	2024-06-12	2024-06-12	0	0	0	0	0	0	0	0	0	0	1	vanc cefepime	0	0	1	0	0	1	1	1	2024-06-13	0	0	1	0
76	2024-06-14	2024-06-25	11	59	1	3	0	0	0	0	0	0	0		Staphylococcus epidermidis	0	0	0	1	1	3	2024-06-14	2024-06-17	3	1	1	1	0	0	0	0	0	0	1	cefazolin	1	1	1	1	0	0	1	1	2024-06-18	0	0	4	1	2024-06-20
77	2024-06-17	2024-07-02	15	69	2	2	1	0	0	1	0	0	0		Staphylococcus hominis	0	0	0	1	0	1	2024-06-17	2024-06-17	0	0	0	0	0	0	0	0	0	0	1	cefazolin gentamycin rifampin	0	1	1	1	0	0	1	0					1	2024-06-19
78	2024-06-20	2024-06-23	3	77	2	3	0	0	0	0	0	0	0		Staphylococcus epidermidis	0	0	0	1	0	1	2024-06-20	2024-06-20	0	0	0	0	0	0	0	0	0	0	0		0	1	1	1	0	0	1	0					0
79	2024-06-21	2024-06-27	6	58	2	2	0	0	0	0	0	0	1	mod MS	Staphylococcus epidermidis	0	0	0	1	0	1	2024-06-21	2024-06-21	0	0	0	0	0	0	0	0	0	0	1	ceftriaxone	0	0	1	0	0	1	0	1	2024-06-24	0	0	3	0
80	2024-06-28	2024-07-12	14	68	2	2	1	0	0	0	0	0	1	G1DD	Staphylococcus epidermidis	0	0	0	1	0	1	2024-06-28	2024-06-28	0	0	0	0	0	0	0	0	0	0	1	cefazolin	0	0	1	0	0	1	1	1	2024-07-03	0	1	5	0
81	2024-05-02	2024-05-09	7	84	1	3	0	0	0	0	0	0	0		Staphylococcus epidermidis	0	0	0	1	0	1	2024-05-02	2024-05-02	0	0	0	0	0	0	0	0	0	0	1	vanc cefepime	0	0	1	0	0	1	1	0					0
82	2024-04-29	2024-05-20	21	72	2	2	0	0	0	0	0	0	0		Staphylococcus epidermidis	0	0	0	1	0	1	2024-05-05	2024-05-05	0	0	0	0	0	0	0	0	0	0	1	vanc	0	1	1	1	0	0	1	1	2024-05-07	0	1	8	0
83	2024-05-06	2024-05-09	3	72	2	5	0	0	0	0	0	0	0		Staphylococcus epidermidis	0	0	0	1	0	1	2024-05-06	2024-05-06	0	0	0	0	0	0	0	0	0	0	1	vanc	0	0	1	0	0	1	1	0					0
84	2024-05-06	2024-05-10	4	42	1	2	0	0	0	0	0	0	0		Staphylococcus epidermidis	0	0	0	1	0	1	2024-05-06	2024-05-06	0	0	0	0	0	0	0	0	0	0	1	vanc cefepime	0	0	1	0	0	1	1	0					0
85	2024-05-07	2024-05-24	17	57	1	2	0	0	0	0	0	0	0		Staphylococcus capitis	0	0	0	1	0	1	2024-05-07	2024-05-07	0	0	0	0	0	0	0	0	0	0	1	ertapenenm	1	1	0	0	1	0	0	1	2024-05-20	0	0	13	0
86	2024-05-09	2024-05-31	22	57	2	2	0	0	0	0	0	0	0		Staphylococcus epidermidis	0	0	0	1	0	1	2024-05-09	2024-05-09	0	0	0	0	0	0	0	0	0	0	1	vanc	0	1	0	0	1	0	1	1	2024-05-15	0	0	6	0
87	2024-05-09	2024-05-13	4	74	1	2	0	0	0	0	0	0	0		Staphylococcus epidermidis	0	0	0	1	0	1	2024-05-09	2024-05-09	0	0	0	0	0	0	0	0	0	0	0		0	0	1	0	0	1	1	0					0
88	2024-05-11	2024-05-15	4	90	2	2	1	0	1	0	0	0	1	sev AS s/p TAVR, G2DD	Staphylococcus epidermidis	0	0	0	1	0	1	2024-05-11	2024-05-11	0	0	0	0	0	0	0	0	0	0	0		0	0	1	0	0	1	1	1	2024-05-15	0	1	4	0
89	2024-05-11	2024-05-14	3	83	1	2	1	0	0	0	0	0	1	G3DD	Staphylococcus epidermidis	0	0	0	1	0	1	2024-05-11	2024-05-11	0	0	0	0	0	0	0	0	0	0	1	vanc	0	0	1	0	0	1	1	1	2024-05-14	0	0	3	0
90	2024-05-13	2024-05-24	11	62	2	2	0	0	0	0	0	0	0		Staphylococcus epidermidis	0	0	0	1	0	1	2024-05-13	2024-05-13	0	0	0	0	0	0	0	0	0	0	1	vanc	0	0	1	0	0	1	1	0					0
91	2024-05-13	2024-05-18	5	94	2	2	0	0	0	0	0	0	0		Staphylococcus epidermidis	0	0	0	1	0	1	2024-05-13	2024-05-13	0	0	0	0	0	0	0	0	0	0	1	ceftriaxone	0	0	1	0	0	1	1	1	2024-05-14	0	0	1	0
92	2024-05-15	2024-05-18	3	79	1	4	1	0	0	0	0	0	1	HFrEF, mod MR	Staphylococcus hominis	0	0	0	1	0	1	2024-05-15	2024-05-15	0	0	0	0	0	0	0	0	0	0	1	vanc ceftriaxone	0	0	1	0	0	1	1	1	2024-05-17	0	0	2	0
93	2024-05-18	2024-05-27	9	45	2	2	0	0	0	0	0	0	0		Staphylococcus haemolyticus	0	0	0	1	0	1	2024-05-18	2024-05-18	0	0	0	0	0	0	0	0	0	0	1	vanc	0	0	1	0	0	1	1	0					0
94	2024-05-21	2024-05-28	7	75	1	2	0	0	0	0	0	0	0		Staphylococcus epidermidis	0	0	0	1	0	1	2024-05-21	2024-05-21	0	0	0	0	0	0	0	0	0	0	1	ceftriaxone	0	0	1	0	0	1	1	1	2024-05-28	0	0	7	0
95	2024-05-22	2024-05-27	5	90	1	2	1	0	0	0	0	0	1	mod TR, sev biatrial enlarge	Staphylococcus epidermidis	0	0	0	1	1	2	2024-05-22	2024-05-22	0	0	0	0	0	0	0	0	0	0	1	cefepime	0	0	1	0	0	1	1	1	2024-05-24	0	0	2	0
96	2024-05-23	2024-06-01	9	88	1	3	0	0	0	0	0	0	0		Staphylococcus pettenkoferi	0	0	0	1	0	1	2024-05-24	2024-05-24	0	0	0	0	0	0	0	0	0	0	1	vanc cefepime	0	0	1	0	0	1	1	0					0
97	2024-05-26	2024-05-30	4	96	2	2	0	0	0	0	0	0	0		Staphylococcus capitis	0	0	0	1	0	1	2024-05-26	2024-05-26	0	0	0	0	0	0	0	0	0	0	1	vanc	0	0	1	0	0	1	1	0					0
98	2024-05-27	2024-06-02	6	75	2	3	1	0	0	0	0	0	1	HFrEF, sev thickened MV AV	Staphylococcus epidermidis	0	0	0	1	0	1	2024-05-27	2024-05-27	0	0	0	0	0	0	0	0	0	0	1	vanc	0	0	1	0	0	1	1	1	2024-05-28	0	1	1	0
99	2024-05-27	2024-06-10	14	72	1	2	0	0	0	0	0	0	0		Staphylococcus hominis	0	0	0	1	0	1	2024-05-27	2024-05-27	0	0	0	0	0	0	0	0	0	0	1	vanc	0	0	1	0	0	1	1	0					0
100	2024-05-30	2024-05-31	1	39	1	3	0	0	0	0	0	0	0		Staphylococcus epidermidis	0	0	0	1	0	1	2024-05-30	2024-05-30	0	0	0	0	0	0	0	0	0	0	1	ceftriaxone	0	0	1	0	0	1	1	0					0
101	2024-04-02	2024-04-10	8	90	2	2	1	0	0	1	0	0	1	mod MR	Staphylococcus epidermidis	0	0	0	1	0	1	2024-04-02	2024-04-02	0	0	0	0	0	0	0	0	0	0	1	ampicillin sulb	0	0	1	0	0	1	1	0					0
102	2024-04-03	2024-04-07	4	92	2	2	0	0	0	0	0	0	0		Staphylococcus epidermidis	0	0	0	1	0	1	2024-04-03	2024-04-03	0	0	0	0	0	0	0	0	0	0	1	vanc cefepime	0	0	1	0	0	1	1	0					0
103	2024-04-08	2024-07-15	98	51	1	2	1	0	0	0	1	0	1	HFrEF	Staphylococcus epidermidis	0	0	0	1	0	1	2024-04-08	2024-04-08	0	1	0	0	1	0	0	0	0	0	1	cefazolin	0	0	1	0	0	1	1	1	2024-04-09	0	0	1	0
104	2024-04-10	2024-04-12	2	32	1	2	0	0	0	0	0	0	0		Staphylococcus epidermidis	0	0	0	1	0	1	2024-04-10	2024-04-10	0	0	0	0	0	0	0	0	0	0	0		0	0	1	0	0	1	1	0					0
105	2024-04-13	2024-04-19	6	81	2	2	0	0	0	0	0	0	1	G1DD	Staphylococcus epidermidis	0	0	0	1	0	1	2024-04-13	2024-04-13	0	1	0	0	0	0	0	0	1	0	1	vanc	0	0	1	0	0	1	1	1	2024-04-17	0	0	4	0
106	2024-04-14	2024-04-30	16	66	1	2	0	0	0	0	0	0	0		Staphylococcus haemolyticus	0	0	0	1	1	2	2024-04-14	2024-04-15	1	0	0	0	0	0	0	0	0	0	1	vanc	0	1	1	1	0	0	1	1	2024-04-19	0	0	5	0
107	2024-04-16	2024-04-19	3	79	1	2	1	0	1	0	0	0	1	G1DD, s/p TAVR	Staphylococcus epidermidis	0	0	0	1	0	1	2024-04-16	2024-04-16	0	0	0	0	0	0	0	0	0	0	1	ceftriaxone	0	0	1	0	0	1	1	1	2024-04-18	0	0	2	0
108	2024-04-16	2024-04-30	14	78	2	2	1	0	1	0	0	0	1	G2DD, s/p TAVR	Staphylococcus epidermidis	0	0	0	1	1	4	2024-04-16	2024-04-22	6	0	0	0	0	0	0	0	0	0	1	vanc	1	1	1	1	0	0	1	1	2024-04-17	0	1	1	1	2024-04-22
109	2024-03-14	2024-05-08	55	38	1	2	0	0	0	0	0	0	0		Staphylococcus epidermidis	0	0	0	1	0	1	2024-04-18	2024-04-18	0	0	0	0	0	0	0	0	0	0	1	vanc	0	1	1	1	0	0	1	0					0
110	2024-04-20	2024-04-26	6	86	2	2	0	0	0	0	0	0	0		Staphylococcus hominis	0	0	0	1	0	1	2024-04-20	2024-04-20	0	0	0	0	0	0	0	0	0	0	1	vanc	0	1	1	1	0	0	1	0					0
111	2024-04-23	2024-05-01	8	58	2	2	1	0	0	0	0	0	1	G1DD, mod TR	Staphylococcus haemolyticus	0	0	0	1	0	1	2024-04-23	2024-04-23	0	0	0	0	0	0	0	0	0	0	1	vanc	0	0	1	0	0	1	1	0					0
112	2024-04-24	2024-04-30	6	28	1	2	0	0	0	0	0	0	0		Staphylococcus capitis	0	0	0	1	0	1	2024-04-24	2024-04-24	0	0	0	0	0	0	0	0	0	0	1	vanc	0	0	1	0	0	1	1	0					0
113	2024-04-25	2024-05-19	24	89	2	3	0	0	0	0	0	0	0		Staphylococcus hominis	0	0	0	1	0	1	2024-04-25	2024-04-25	0	0	0	0	0	0	0	0	0	0	1	cefepime	0	0	1	0	0	1	1	1	2024-05-07	0	1	12	0
114	2024-04-26	2024-05-17	21	88	2	2	1	0	0	1	0	0	1	mod TR	Staphylococcus epidermidis	0	0	0	1	0	1	2024-04-26	2024-04-26	0	0	0	0	0	0	0	0	0	0	1	vanc meropenem	0	0	1	0	0	1	0	1	2024-05-07	0	1	11	0
115	2024-04-27	2024-05-01	4	43	2	2	1	0	0	0	0	0	1	MVP s/p repair	Staphylococcus capitis	0	0	0	1	0	1	2024-04-27	2024-04-27	0	0	0	0	0	0	0	0	0	0	1	vanc	0	0	1	0	0	1	1	1	2024-04-29	0	0	2	0
116	2024-04-30	2024-05-07	7	92	1	2	0	0	0	0	0	0	0		Staphylococcus capitis	0	0	0	1	0	1	2024-04-30	2024-04-30	0	0	0	0	0	0	0	0	0	0	1	vanc cefepime	0	0	1	0	0	1	1	0					0
117	2024-03-01	2024-03-08	7	82	2	2	0	0	0	0	0	0	0		Staphylococcus capitis	0	0	0	1	0	1	2024-03-01	2024-03-01	0	0	0	0	0	0	0	0	0	0	1	ceftriaxone	0	0	1	0	0	1	1	0					0
118	2024-03-02	2024-03-09	7	44	2	3	1	0	0	0	1	0	0		Staphylococcus hominis	0	0	0	1	0	1	2024-03-02	2024-03-02	0	0	0	0	0	0	0	0	0	0	1	vanc	0	1	1	1	0	0	1	0					0
119	2024-03-03	2024-03-14	11	65	1	2	0	0	0	0	0	0	0		Staphylococcus epidermidis	0	0	0	1	0	1	2024-03-03	2024-03-03	0	0	0	0	0	0	0	0	0	0	1	doxycycline	0	0	1	0	0	1	1	1	2024-03-06	0	0	3	0
120	2024-03-03	2024-03-07	4	77	2	3	0	0	0	0	0	0	0		Staphylococcus capitis	0	0	0	1	0	1	2024-03-03	2024-03-03	0	0	0	0	0	0	0	0	0	0	1	vanc	0	1	1	1	0	0	1	1	2024-03-06	0	0	3	0
121	2024-03-05	2024-03-12	7	70	1	2	0	0	0	0	0	0	0		Staphylococcus epidermidis	0	0	0	1	0	1	2024-03-05	2024-03-05	0	0	0	0	0	0	0	0	0	0	1	vanc cefepime	0	0	1	0	0	1	1	1	2024-03-11	0	1	6	0
122	2024-03-06	2024-03-09	3	70	1	3	0	0	0	0	0	0	0		Staphylococcus hominis	0	0	0	1	0	1	2024-03-06	2024-03-06	0	0	0	0	0	0	0	0	0	0	1	ceftriaxone	0	0	1	0	0	1	1	0					0
123	2024-03-08	2024-03-11	3	75	1	3	1	0	0	0	0	0	1	G1DD	Staphylococcus hominis	0	0	0	1	0	1	2024-03-08	2024-03-08	0	0	0	0	0	0	0	0	0	0	1	ceftriaxone	0	0	1	0	0	1	1	1	2024-03-10	0	1	2	0
124	2024-03-08	2024-03-11	3	60	2	3	0	0	0	0	0	0	0		Staphylococcus hominis	0	0	0	1	0	1	2024-03-08	2024-03-08	0	0	0	0	0	0	0	0	0	0	1	ceftriaxone	0	0	1	0	0	1	1	0					0
125	2024-03-10	2024-03-22	12	71	1	2	1	0	0	0	1	0	0		Staphylococcus epidermidis	0	0	0	1	0	1	2024-03-10	2024-03-10	0	1	0	0	1	0	0	0	0	0	1	linezolid levofloxacin	0	1	1	1	0	0	1	1	2024-03-11	0	0	1	0
126	2024-03-11	2024-03-16	5	80	2	2	1	0	0	0	0	0	1	G1DD	Staphylococcus hominis	0	0	0	1	0	1	2024-03-11	2024-03-11	0	0	0	0	0	0	0	0	0	0	1	cefuroxime	0	1	1	1	0	0	0	1	2024-03-15	0	0	4	0
127	2024-03-11	2024-03-19	8	61	1	3	0	0	0	0	0	0	0		Staphylococcus hominis	0	0	0	1	0	1	2024-03-11	2024-03-11	0	0	0	0	0	0	0	0	0	0	1	cefepime	0	1	1	1	0	0	1	1	2024-03-13	0	0	2	0
128	2024-03-14	2024-03-26	12	54	1	2	1	0	0	0	1	0	0		Staphylococcus epidermidis	0	0	0	1	0	1	2024-03-14	2024-03-14	0	1	0	0	1	0	0	0	0	0	1	daptomycin	0	1	1	1	0	0	1	1	2024-03-19	0	0	5	0
129	2024-03-14	2024-03-27	13	74	1	2	0	0	0	0	0	0	0		Staphylococcus epidermidis	0	0	0	1	0	1	2024-03-14	2024-03-14	0	0	0	0	0	0	0	0	0	0	1	vanc cefepime	0	0	1	0	0	1	0	0					0
130	2024-03-16	2024-03-19	3	53	1	5	0	0	0	0	0	0	0		Staphylococcus epidermidis	0	0	0	1	0	1	2024-03-16	2024-03-16	0	0	0	0	0	0	0	0	0	0	1	ceftriaxone	0	0	1	0	0	1	1	0					0
131	2024-03-17	2024-03-25	8	23	2	2	0	0	0	0	0	0	0		Staphylococcus epidermidis	0	0	0	1	0	1	2024-03-17	2024-03-17	0	0	0	0	0	0	0	0	0	0	1	vanc	0	1	0	0	1	0	1	1	2024-03-22	0	0	5	0
132	2024-03-12	2024-04-19	38	41	1	3	1	0	0	0	1	0	0		Staphylococcus epidermidis	0	0	0	1	0	1	2024-03-19	2024-03-19	0	1	0	0	1	0	0	0	0	0	1	vanc	1	1	1	1	0	0	1	1	2024-03-21	0	0	9	0
133	2024-03-21	2024-03-26	5	73	2	2	1	0	0	0	1	0	0		Staphylococcus hominis	0	0	0	1	0	1	2024-03-21	2024-03-21	0	0	0	0	0	0	0	0	0	0	1	vanc cefepime	0	1	1	1	0	0	1	0					0
134	2024-03-27	2024-04-05	9	59	2	2	0	0	0	0	0	0	0		Staphylococcus epidermidis	0	0	0	1	0	1	2024-03-27	2024-03-27	0	0	0	0	0	0	0	0	0	0	1	ceftriaxone	0	1	1	1	0	0	1	0					0
			Mean	13.7197	68.4328			67	5	5	11	22	2	54							48	247			130	55	9	11	14	12	6	3	9	13	130		55	73	119	58	15	61	116	99		8	30		21
			Median	9	71			0.5	0.0373134	0.0373134	0.0820896	0.164179	0.0149254	0.402985							0.358209					0.410448	0.0671642	0.0820896	0.104478	0.0895522	0.0447761	0.0223881	0.0671642	0.0970149	0.970149		0.410448	0.544776	0.88806	0.432836	0.11194	0.455224	0.865672	0.738806		0.0808081	0.30303		0.156716
			Mode	7	77			23	0	0	3	6	1	20	MSSA	28					25	71	1271630	1271679	49	19	4	5	4	7	1	1	3	6	28		24	24	24				20	28		4	6		7
			SD	14.8865	16.3369			7	4	1	1	2	1	4	MRSA	10					9	46	454037	454077	40	6	3	3	1	1	0	1	0	1	10		10	7	7				10	10		1	4		6
			Max	107	96
			Min	1	23			0	0	0	0	0	0	2	Strep mutans	3					0	3	136224	136224	0	3	1	0	0	0	0	0	1	1	3		1	2	3				3	3		0	2		1
			Q1	6	58			1	0	0	0	1	0	1	Strep mitis group	7					0	7	318005	318005	0	5	0	0	0	2	0	1	0	3	7		3	3	6				6	5		1	1		1
			Q2	16	80.75			2	0	1	0	0	0	1	Strep gordornii	2					1	3	90806	90807	1	0	0	0	0	0	0	0	0	0	2		2	2	2				2	2		1	1		2
			IQR	10	22.75			1	0	0	0	1	0	0	Strep constellatus	3					0	3	136323	136323	0	2	0	0	0	1	2	0	0	0	3		1	2	2				2	2		0	0		0
								0	0	0	0	0	0	0	Strep anginosus	2					0	2	90752	90752	0	2	0	1	0	1	0	0	0	1	2		2	2	1				1	2		0	0		0
															Strep sanguinis	0					0
		Male	Female
		68	66												Strep lutetiensis	0					0
		50.7463	49.2537
								8	1	0	4	2	0	5	E.faecalis	10					8	33	454184	454207	23	8	0	1	2	0	2	0	4	0	10		6	9	9				10	10		1	5		1
								1	0	0	0	2	0	2	VRE	2					1	5	90854	90861	7	2	0	0	2	0	1	0	0	0	2		2	0	2				1	2		0	0		0
		White	Black	Hisp	Asian
		97	28	3	6			14	0	3	2	5	0	12	Staph epidermidis	41					3	47	1861895	1861904	9	6	1	1	4	0	0	0	1	0	37		3	12	39				38	24		0	7		2
		72.3881	20.8955	2.23881	4.47761			6	0	0	1	2	0	3	Staph hominis	12					0	12	544659	544659	0	0	0	0	0	0	0	0	0	0	12		0	6	12				11	5		0	2		1
								1	0	0	0	0	0	1	Staph capitis	7					0	7	317790	317790	0	0	0	0	0	0	0	0	0	0	7		1	2	6				6	3		0	0		0
								1	0	0	0	0	0	1	Staph haemolyticus	3					1	4	136231	136232	1	0	0	0	0	0	0	0	0	0	3		0	1	3				3	1		0	0		0
								2	0	0	0	1	0	2	Staph pettenkoferi	3					0	3	136339	136339	0	1	0	0	1	0	0	0	0	0	3		0	1	2				3	1		0	1		0
								0	0	0	0	0	0	0	Staph saccarolyticus	1					0	1	45449	45449	0	1	0	0	0	0	0	0	0	1	1		0	0	1				0	1		0	1		0
								67	5	5	11	22	2	54	check	134					48	247			130	55	9	11	14	12	6	3	9	13	130		55	73	119				116	99		8	30		21
[truncated: 9 more columns]

## Sheet: Analysis
Subject #	Admission Date	Discharge Date	LOS	Age	Sex	Race	Comorbidity present (at least 1)?	IVDU	Prosthetic Valve	Intracardiac device	Chronic in-line cath	Previous IE	Cardio-structural abnormality	Type of abnormality	Bcx initial	Staph aureus	Viridans	Enterococcus	CoNS	Bcx repeat positive?	Total sets of positive Bcx	Date initial positive Bcx	Date last positive Bcx	Days Bcx positive	Alternative source of infx?	OM?	Cellulitis or open wound?	Line related?	Abscess?	Intra-abdominal?	PNA?	UTI?	Other	Abx used?	Abx tx? (ended w/)	Planned longterm abx tx (~4-6wks) +/- PICC?	fever?	< 3 days defervescence or remained afebrile?	defervesced	not defervesced	remained afebrile	WBC downtrend or remained nrml?	TTE used?	TTE date	TTE new valvular veg?	TTE new worsened fxnl findings from previous TTEs?	Time to TTE	TEE used?	TEE date
1	2024-05-30	2024-06-19	20	85	1	2	1	0	1	1	0	0	1	mod TR, MR, AS w/ TAVR, CABG 2000	Methicillin-Resistant Staphylococcus aureus	1	0	0	0	1	11	2024-05-30	2024-06-12	13	0	0	0	0	0	0	0	0	0	1	Daptomycin	1	0	1	0	0	1	1	1	2024-05-31	0	0	1	1	2024-06-03
2	2024-06-03			78	1	3	0	0	0	0	0	0	0		Methicillin-Resistant Staphylococcus aureus	1	0	0	0	1	6	2024-06-03	2024-06-07	4	1	1	0	0	0	0	0	0	0	1	Daptomycin	1	1	1	1	0	0	1	1	2024-06-05	0	0	2	0
3	2024-06-05	2024-06-22	17	62	1	2	1	0	0	0	0	0	1	thickened AV leaf	Staphylococcus aureus	1	0	0	0	1	5	2024-06-05	2024-06-11	6	0	0	0	0	0	0	0	0	1	1	Ertapenem nafcillin	0	1	0	0	1	0	1	1	2024-06-05	0	0	0	1	2024-06-12
4	2024-06-06	2024-06-12	6	77	1	2	0	0	0	0	0	0	0		Staphylococcus aureus	1	0	0	0	1	2	2024-06-06	2024-06-07	1	1	0	0	0	0	0	0	1	1	1	cefazolin	0	1	1	1	0	0	1	1	2024-06-07	0	0	1	1	2024-06-10
5	2024-06-10	2024-06-13	3	71	1	2	1	0	0	0	1	1	1	G3DD, sev LA dilation	Staphylococcus aureus	1	0	0	0	1	2	2024-06-10	2024-06-11	1	1	0	0	0	1	0	0	0	0	1	vanc zosyn	1	1	1	1	0	0	0	1	2024-06-11	1	1	1	0
6	2024-06-11	2024-06-22	11	81	1	2	1	0	0	0	0	0	1	mod MR, TR, sev biatrial enlarge	Staphylococcus aureus	1	0	0	0	1	4	2024-06-11	2024-06-15	4	1	0	1	0	0	1	0	0	0	1	Ertapenem cefazolin	0	1	1	1	0	0	0	1	2024-06-12	0	0	1	0
7	2024-06-10	2024-07-12	32	45	2	2	0	0	0	0	0	0	0		Staphylococcus aureus	1	0	0	0	0	1	2024-06-12	2024-06-12	0	0	0	0	0	0	0	0	0	0	1	cefazolin	1	0	1	0	0	1	1	1	2024-06-14	0	0	2	0
8	2024-06-13	2024-06-23	10	60	1	3	1	0	0	0	0	0	1	G2DD	Staphylococcus aureus	1	0	0	0	1	2	2024-06-13	2024-06-14	1	1	0	0	0	1	0	0	0	0	1	cefazolin	1	1	1	1	0	0	1	1	2024-06-14	0	0	1	0
9	2024-06-15	2024-06-27	12	64	2	2	1	0	0	0	1	0	0		Staphylococcus aureus	1	0	0	0	1	2	2024-06-20	2024-06-21	1	1	0	1	0	0	0	0	0	0	1	cefazolin	1	1	1	1	0	0	1	1	2024-06-24	0	0	4	0
10	2024-06-25	2024-07-02	7	46	1	2	1	1	0	0	1	1	1	1/4/24 veg seen, sev TR,	Methicillin-Resistant Staphylococcus aureus	1	0	0	0	1	5	2024-06-25	2024-06-30	5	1	1	1	0	1	0	0	0	0	1	Daptomycin	1	1	1	1	0	0	1	1	2024-06-25	1	1	0	0
11	2024-06-27	2024-07-28	31	74	1	2	1	0	0	0	0	0	1	sev calc AV, mod AS, mod TR	Staphylococcus aureus	1	0	0	0	0	1	2024-06-27	2024-06-27	0	1	0	1	0	0	0	1	0	0	1	vanc cefepime	0	1	1	1	0	0	0	1	2024-06-28	0	1	1	0
12	2024-05-01	2024-05-11	10	70	1	5	1	0	0	0	1	0	1	G1DD	Staphylococcus aureus	1	0	0	0	1	2	2024-05-01	2024-05-03	2	1	0	0	1	0	0	0	0	0	1	cefazolin	1	1	1	1	0	0	1	1	2024-05-07	0	1	6	0
13	2024-05-02	2024-05-24	22	91	2	2	1	0	0	0	0	0	1	HFrEF	Staphylococcus aureus	1	0	0	0	1	2	2024-05-02	2024-05-03	1	1	0	0	0	1	0	0	0	0	1	cefazolin	1	1	1	1	0	0	1	1	2024-05-06	0	0	4	0
14	2024-05-07	2024-05-21	14	71	2	2	1	0	0	0	1	0	0		Staphylococcus aureus	1	0	0	0	1	3	2024-05-07	2024-05-10	3	1	0	1	1	0	0	0	0	0	1	cefazolin	1	1	0	0	1	0	1	1	2024-05-08	0	0	1	0
15	2024-05-08	2024-05-20	12	77	1	2	1	0	0	0	0	0	1	at least mod TR'	Staphylococcus aureus	1	0	0	0	0	1	2024-05-08	2024-05-08	0	1	0	0	0	1	0	0	1	0	1	cefazolin	1	1	1	1	0	0	1	1	2024-05-09	0	0	1	1	2024-05-13
16	2024-05-08	2024-05-23	15	83	2	2	1	0	0	0	0	0	1	PFO, sev biatrial enlarge, G1DD, mod LVH	Staphylococcus aureus	1	0	0	0	1	3	2024-05-17	2024-05-19	2	0	0	0	0	0	0	0	0	0	1	nafcillin	1	1	1	1	0	0	1	1	2024-05-20	0	0	3	0
17	2024-05-26	2024-06-15	20	59	1	3	1	0	0	0	0	0	1	G1DD, mod mitral annular calc	Staphylococcus aureus	1	0	0	0	1	2	2024-05-28	2024-05-29	1	1	0	1	0	0	0	0	0	0	1	cefazolin	1	1	1	1	0	0	1	1	2024-05-30	1	0	2	0
18	2024-04-03	2024-04-13	10	51	1	3	0	0	0	0	0	0	0		Staphylococcus aureus	1	0	0	0	1	3	2024-04-03	2024-04-06	3	1	1	0	0	0	0	0	0	0	1	cefazolin	1	1	1	1	0	0	1	1	2024-04-05	0	0	2	1	2024-04-09
19	2024-04-11	2024-04-16	5	65	2	2	1	0	0	0	0	0	1	thickened AV leaf	Methicillin-Resistant Staphylococcus aureus	1	0	0	0	1	3	2024-04-11	2024-04-12	1	0	0	0	0	0	0	0	0	1	1	Daptomycin	1	0	1	0	0	1	1	1	2024-04-12	0	1	1	0
20	2024-04-10	2024-04-19	9	85	1	2	0	0	0	0	0	0	0		Staphylococcus aureus	1	0	0	0	1	2	2024-04-14	2024-04-14	0	0	0	0	0	0	0	0	0	0	1	cefazolin	1	1	1	1	0	0	1	1	2024-04-18	0	0	4	0
21	2024-04-18	2024-04-26	8	85	2	2	1	0	0	0	0	0	1	G1DD	Staphylococcus aureus	1	0	0	0	1	3	2024-04-18	2024-04-20	2	1	0	0	0	1	0	0	0	0	1	cefazolin	1	1	0	0	1	0	1	1	2024-04-22	0	1	4	0
22	2024-04-19	2024-04-26	7	79	1	2	1	0	0	1	0	0	1	G2DD	Staphylococcus aureus	1	0	0	0	1	1	2024-04-19	2024-04-19	0	0	0	0	0	0	0	0	0	1	1	cefazolin	1	1	1	1	0	0	0	1	2024-04-24	0	0	5	1	2024-04-26
23	2024-04-19	2024-06-04	46	46	2	2	1	1	0	0	1	0	0		Methicillin-Resistant Staphylococcus aureus	1	0	0	0	1	3	2024-04-19	2024-04-22	3	1	0	0	1	0	0	0	0	0	1	vanc	1	0	1	0	0	1	1	1	2024-04-24	0	0	5	1	2024-04-26
24	2024-04-20	2024-04-30	10	87	2	2	1	0	0	0	0	0	1	mod MS, G1DD	Staphylococcus aureus	1	0	0	0	1	2	2024-04-20	2024-04-21	1	0	0	0	0	0	0	0	0	0	1	cefazolin	1	1	1	1	0	0	1	1	2024-04-24	0	0	4	1	2024-04-29
25	2024-04-23	2024-05-11	18	66	1	2	1	0	0	0	0	0	1	G2DD	Staphylococcus aureus	1	0	0	0	1	4	2024-04-23	2024-04-26	3	1	1	0	0	1	0	0	0	0	1	cefazolin	1	0	1	0	0	1	0	1	2024-04-29	0	0	6	0
26	2024-04-24	2024-05-12	18	59	2	2	1	0	0	0	1	0	1	G1DD	Staphylococcus aureus	1	0	0	0	1	3	2024-04-24	2024-04-27	3	1	0	0	1	0	0	0	0	0	1	cefazolin	1	1	1	1	0	0	1	1	2024-05-03	1	0	9	0
27	2024-04-21	2024-04-30	9	72	1	2	1	0	0	0	0	0	1	anterolat hypokinesis, apical kinesis, HFmrEF	Staphylococcus aureus	1	0	0	0	1	2	2024-04-25	2024-04-27	2	1	1	0	0	0	0	0	0	1	1	cefazolin	1	1	1	1	0	0	1	1	2024-04-26	0	0	1	0
28	2024-04-24	2024-05-10	16	71	2	2	1	0	0	0	0	0	1	mod TR, G1DD	Staphylococcus aureus	1	0	0	0	1	2	2024-04-27	2024-04-28	1	1	1	0	0	1	0	0	0	1	1	nafcillin	1	1	1	1	0	0	1	1	2024-05-02	0	0	5	0
29	2024-02-25	2024-06-11	107	54	1	3	0	0	0	0	0	0	0		Methicillin-Resistant Staphylococcus aureus	1	0	0	0	1	4	2024-04-25	2024-04-28	3	1	0	1	0	0	0	0	0	0	1	vanc	1	1	0	0	1	0	1	1	2024-04-29	0	0	4	0
30	2024-02-29	2024-03-28	28	28	2	2	1	1	0	0	0	0	0		Methicillin-Resistant Staphylococcus aureus	1	0	0	0	1	3	2024-02-29	2024-03-02	2	1	0	0	0	0	0	1	0	0	1	vanc	1	1	0	0	1	0	1	1	2024-03-01	0	1	1	1	2024-03-14
31	2024-02-21	2024-03-17	25	82	1	2	1	0	0	0	1	0	1	sev AS	Staphylococcus aureus	1	0	0	0	1	2	2024-02-29	2024-03-01	1	1	0	0	1	0	0	0	1	0	1	vanc	1	0	1	0	0	1	0	1	2024-03-01	0	1	1	0
32	2024-03-04	2024-03-27	23	79	2	2	1	0	0	0	0	0	1	G3DD, mod RV dilation	Methicillin-Resistant Staphylococcus aureus	1	0	0	0	1	5	2024-03-04	2024-03-08	4	0	0	0	0	0	0	0	0	0	1	Daptomycin	1	1	1	1	0	0	1	1	2024-03-06	0	0	2	1	2024-03-13
33	2024-03-05	2024-04-01	27	77	2	3	1	0	0	1	0	0	1	sev biatrial enlarge, mod TR	Staphylococcus aureus	1	0	0	0	1	3	2024-03-13	2024-03-15	2	0	0	0	0	0	0	0	0	0	1	cefazolin	1	0	1	0	0	1	1	1	2024-03-14	0	0	1	1	2024-03-15
34	2024-03-13	2024-03-26	13	95	2	4	0	0	0	0	0	0	0		Staphylococcus aureus	1	0	0	0	1	5	2024-03-13	2024-03-17	4	1	0	0	0	0	0	0	0	1	1	cefazolin	1	1	1	1	0	0	1	1	2024-03-15	0	0	2	0
35	2024-04-08	2024-05-13	35	42	2	4	1	1	0	0	0	0	0		Methicillin-Resistant Staphylococcus aureus	1	0	0	0	1	5	2024-04-11	2024-04-16	5	1	1	1	0	0	0	0	0	0	1	Daptomycin	1	1	0	0	1	0	1	1	2024-04-15	0	0	4	1	2024-04-15
36	2024-03-27	2024-03-29	2	64	2	2	1	0	0	0	0	0	1	G2DD	Staphylococcus aureus	1	0	0	0	1	3	2024-03-27	2024-03-28	1	0	0	0	0	0	0	0	0	0	1	cefazolin	1	1	1	1	0	0	0	1	2024-03-28	1	1	1	0
37	2024-03-28	2024-04-08	11	87	2	2	1	0	0	1	0	0	0	HFrEF	Staphylococcus aureus	1	0	0	0	1	4	2024-03-28	2024-03-31	3	0	0	0	0	0	0	0	0	0	1	nafcillin	1	1	0	0	1	0	0	1	2024-04-01	0	0	4	0
38	2024-03-30	2024-04-30	31	69	2	3	0	0	0	0	0	0	0		Methicillin Resistant Staphylococcus aureus	1	0	0	0	0	1	2024-03-30	2024-03-30	0	0	0	0	0	0	0	0	0	0	1	Daptomycin	1	1	1	1	0	0	1	1	2024-04-01	0	1	2	1	2024-04-03
39	2024-05-31	2024-06-12	12	70	2	2	0	0	0	0	0	0	0		Streptococcus mutans	0	1	0	0	0	1	2024-06-01	2024-06-01	0	1	1	0	0	0	0	0	0	0	1	ceftriaxone	1	1	1	1	0	0	1	1	2024-06-05	0	1	4	0
40	2024-06-06	2024-06-10	4	78	2	2	1	0	0	0	1	0	0		Streptococcus mitis group	0	1	0	0	0	1	2024-06-06	2024-06-06	0	1	0	0	0	0	0	0	0	1	1	ceftriaxone	0	1	1	1	0	0	1	0					0
41	2024-06-07	2024-06-13	6	71	1	2	1	0	1	0	0	0	0		Streptococcus gordonii	0	1	0	0	0	1	2024-06-07	2024-06-07	0	0	0	0	0	0	0	0	0	0	1	ceftriaxone	1	1	1	1	0	0	1	1	2024-06-10	0	0	3	1	2024-06-12
42	2024-06-12	2024-06-19	7	83	1	5	0	0	0	0	0	0	0		Streptococcus mitis group	0	1	0	0	0	1	2024-06-12	2024-06-12	0	1	0	0	0	1	0	0	0	0	1	ceftriaxone	1	1	1	1	0	0	1	1	2024-06-14	1	0	2	0
43	2024-06-17	2024-06-22	5	65	1	3	0	0	0	0	0	0	0		Streptococcus mitis group	0	1	0	0	0	1	2024-06-17	2024-06-17	0	1	0	0	0	0	0	1	0	0	1	ceftriaxone	0	0	1	0	0	1	1	1	2024-06-20	0	1	3	0
44	2024-06-30	2024-07-10	10	55	2	2	1	0	0	0	1	0	0		Streptococcus constellatus	0	1	0	0	0	1	2024-06-30	2024-06-30	0	0	0	0	0	0	0	0	0	0	1	levofloxacin	0	1	0	0	1	0	1	1	2024-07-02	0	0	2	0
45	2024-05-09	2024-05-14	5	58	1	3	0	0	0	0	0	0	1	sev MR	Streptococcus mutans	0	1	0	0	0	1	2024-05-09	2024-05-09	0	1	0	0	0	0	0	0	0	1	1	ceftriaxone gentamycin	0	1	1	1	0	0	1	1	2024-05-10	0	0	1	1	2024-05-13
46	2024-05-16	2024-06-05	20	77	1	2	0	0	0	0	0	0	0		Streptococcus mitis group	0	1	0	0	0	1	2024-05-17	2024-05-17	0	1	0	0	0	0	0	0	0	1	1	vanc	1	1	0	0	1	0	0	1	2024-05-21	0	0	4	1	2024-05-22
47	2024-05-21	2024-06-04	14	75	1	2	0	0	0	0	0	0	0		Streptococcus mitis group	0	1	0	0	0	1	2024-05-21	2024-05-21	0	0	0	0	0	0	0	0	0	0	1	ceftriaxone	0	0	1	0	0	1	1	1	2024-05-24	0	0	3	0
48	2024-05-29	2024-06-05	7	54	1	3	0	0	0	0	0	0	0		Streptococcus constellatus	0	1	0	0	0	1	2024-05-29	2024-05-29	0	1	0	0	0	0	1	0	0	0	1	amoxicillin clav	0	0	1	0	0	1	1	0					0
49	2024-04-13	2024-05-08	25	78	2	2	0	0	0	0	0	0	0		Streptococcus anginosus	0	1	0	0	0	1	2024-04-13	2024-04-13	0	1	0	0	0	0	0	0	0	1	1	meropenem	1	1	0	0	1	0	0	1	2024-04-20	0	0	7	0
50	2024-04-27	2024-05-23	26	36	1	3	0	0	0	0	0	0	0		Streptococcus constellatus	0	1	0	0	0	1	2024-04-27	2024-04-27	0	1	0	0	0	1	1	0	0	0	1	ceftriaxone	1	1	1	1	0	0	0	1	2024-05-01	0	0	4	0
51	2024-04-28	2024-05-03	5	95	2	2	0	0	0	0	0	0	0		Streptococcus mitis group	0	1	0	0	0	1	2024-04-28	2024-04-28	0	0	0	0	0	0	0	0	0	0	1	ceftriaxone	0	0	1	0	0	1	1	1	2024-05-02	0	0	4	0
52	2024-03-05	2024-03-15	10	42	1	2	1	0	0	0	0	0	1	bicuspid AV and AS	Streptococcus gordonii	0	1	0	0	1	2	2024-03-05	2024-03-06	1	0	0	0	0	0	0	0	0	0	1	ceftriaxone	1	1	1	1	0	0	1	1	2024-03-06	1	1	1	1	2024-03-08
53	2024-03-06	2024-04-03	28	37	2	2	0	0	0	0	0	0	0		Streptococcus anginosus	0	1	0	0	0	1	2024-03-06	2024-03-06	0	1	0	1	0	1	0	0	0	0	1	cefazolin levofloxacin	1	1	1	1	0	0	1	1	2024-03-08	0	0	2	0
54	2024-03-08	2024-03-15	7	86	1	2	0	0	0	0	0	0	1	G1DD, mod AS	Streptococcus mutans	0	1	0	0	0	1	2024-03-08	2024-03-08	0	1	0	0	0	0	0	0	1	0	1	amoxicillin	0	0	1	0	0	1	1	1	2024-03-12	0	1	4	0
55	2024-03-18	2024-03-26	8	74	2	2	0	0	0	0	0	0	1	G1DD	Streptococcus mitis group	0	1	0	0	0	1	2024-03-18	2024-03-18	0	1	0	0	0	1	0	0	0	1	1	ceftriaxone	1	0	1	0	0	1	1	0					0
56	2024-06-15	2024-06-24	9	87	2	5	0	0	0	0	0	0	0	G1DD	Enterococcus faecalis	0	0	1	0	1	2	2024-06-14	2024-06-15	1	1	0	0	0	0	0	0	1	0	1	amoxicillin	0	1	1	1	0	0	1	1	2024-06-19	0	0	5	0
57	2024-06-16			55	2	2	1	0	0	1	0	0	1	HCM	Enterococcus faecalis	0	0	1	0	1	4	2024-06-26	2024-06-29	3	0	0	0	0	0	0	0	0	0	1	ceftriaxone ampicillin	1	1	1	1	0	0	1	1	2024-07-12	0	1	16	0
58	2024-06-26	2024-07-11	15	86	2	2	1	0	0	1	0	0	0		Enterococcus faecalis	0	0	1	0	0	1	2024-06-28	2024-06-28	0	1	0	0	0	0	0	0	1	0	1	amoxicillin	0	1	1	1	0	0	1	1	2024-07-01	0	1	3	0
59	2024-05-09	2024-05-16	7	77	2	5	0	0	0	0	1	0	1	G1DD	Vancomycin resistant Enterococcus faecalis	0	0	1	0	1	4	2024-05-09	2024-05-16	7	1	0	0	1	0	1	0	0	0	1	Daptomycin	1	0	1	0	0	1	0	1	2024-05-13	0	0	4	0
60	2024-05-13	2024-06-01	19	81	1	2	1	0	0	1	0	0	1	HFrEF	Enterococcus faecalis	0	0	1	0	1	2	2024-05-13	2024-05-14	1	1	0	0	0	0	1	0	0	0	1	ceftriaxone ampicillin	1	1	1	1	0	0	1	1	2024-05-17	0	1	4	0
61	2024-03-30	2024-04-05	6	87	2	3	1	0	0	1	0	0	1	G1DD, mod TR	Enterococcus faecalis	0	0	1	0	1	3	2024-03-31	2024-04-02	2	0	0	0	0	0	0	0	0	0	1	piperacillin tazo	1	0	1	0	0	1	1	1	2024-04-01	0	1	1	0
62	2024-04-16	2024-04-21	5	47	1	2	1	1	0	0	0	0	1	sev TR	Enterococcus faecalis	0	0	1	0	1	4	2024-04-16	2024-04-21	5	1	0	1	0	0	0	0	0	0	1	ceftriaxone ampicillin	1	1	1	1	0	0	1	1	2024-04-18	1	0	2	0
63	2024-04-16	2024-05-30	44	54	1	2	1	0	0	0	1	0	0		Enterococcus faecalis	0	0	1	0	1	5	2024-04-16	2024-04-19	3	1	0	0	1	0	0	0	0	0	1	ceftriaxone ampicillin	1	1	1	1	0	0	1	1	2024-04-19	0	0	3	0
64	2024-04-27	2024-05-07	10	82	1	2	1	0	0	0	0	0	1	mod AS	Enterococcus faecalis	0	0	1	0	0	1	2024-04-29	2024-04-29	0	1	0	0	0	0	0	0	1	0	1	ampicillin	0	1	1	1	0	0	1	1	2024-04-29	0	1	0	0
65	2024-03-24	2024-04-06	13	54	2	2	0	0	0	0	0	0	0		Enterococcus faecalis	0	0	1	0	1	6	2024-03-24	2024-03-29	5	1	0	0	0	0	0	0	1	0	1	linezolid	0	1	0	0	1	0	1	1	2024-03-29	0	0	5	1	2024-04-01
66	2024-05-21	2024-05-31	10	71	2	2	1	0	0	0	1	0	1	mod TR, G1DD	Vancomycin resistant Enterococcus faecalis	0	0	1	0	0	1	2024-05-21	2024-05-21	0	1	0	0	1	0	0	0	0	0	1	Daptomycin	1	0	1	0	0	1	1	1	2024-05-24	0	0	3	0
67	2024-04-16	2024-05-30	44	54	1	2	1	0	0	0	1	0	0		Enterococcus faecalis	0	0	1	0	1	5	2024-04-16	2024-04-19	3	1	0	0	1	0	1	0	0	0	1	ceftriaxone ampicillin	1	1	1	1	0	0	1	1	2024-04-19	0	0	3	0
68	2024-06-01	2024-06-06	5	69	1	2	1	0	0	0	1	0	0		Staphylococcus epidermidis	0	0	0	1	0	1	2024-06-01	2024-06-01	0	0	0	0	0	0	0	0	0	0	1	levofloxacin	0	1	1	1	0	0	1	0					0
69	2024-06-04	2024-06-14	10	53	1	2	0	0	0	0	0	0	0		Staphylococcus epidermidis	0	0	0	1	0	1	2024-06-04	2024-06-04	0	0	0	0	0	0	0	0	0	0	1	vanc cefepime	0	0	1	0	0	1	1	0					0
70	2024-06-06	2024-07-04	28	73	2	2	0	0	0	0	0	0	0		Staphylococcus saccarolyticus	0	0	0	1	0	1	2024-06-06	2024-06-06	0	1	0	0	0	0	0	0	0	1	1	vanc	0	0	1	0	0	1	0	1	2024-06-10	0	1	4	0
71	2024-06-06	2024-06-14	8	69	1	2	1	0	0	0	0	0	1	G1DD	Staphylococcus pettenkoferi	0	0	0	1	0	1	2024-06-06	2024-06-06	0	0	0	0	0	0	0	0	0	0	1	ampicillin sulb	0	1	0	0	1	0	1	0					0
72	2024-06-10	2024-06-14	4	63	2	2	0	0	0	0	0	0	0		Staphylococcus epidermidis	0	0	0	1	0	1	2024-06-10	2024-06-10	0	0	0	0	0	0	0	0	0	0	1	vanc cefepime	0	0	1	0	0	1	1	0					0
73	2024-06-11	2024-06-21	10	76	2	2	0	0	0	0	0	0	0		Staphylococcus epidermidis	0	0	0	1	0	1	2024-06-11	2024-06-11	0	0	0	0	0	0	0	0	0	0	1	cefazolin ampicillin sulb	0	0	1	0	0	1	1	1	2024-06-12	0	0	1	0
74	2024-06-11	2024-06-20	9	80	1	3	1	0	0	0	1	0	1	G3DD	Staphylococcus pettenkoferi	0	0	0	1	0	1	2024-06-11	2024-06-11	0	1	0	0	1	0	0	0	0	0	1	vanc	0	0	1	0	0	1	1	1	2024-06-14	0	1	3	0
75	2024-06-12	2024-06-20	8	81	1	3	0	0	0	0	0	0	0		Staphylococcus epidermidis	0	0	0	1	0	1	2024-06-12	2024-06-12	0	0	0	0	0	0	0	0	0	0	1	vanc cefepime	0	0	1	0	0	1	1	1	2024-06-13	0	0	1	0
76	2024-06-14	2024-06-25	11	59	1	3	0	0	0	0	0	0	0		Staphylococcus epidermidis	0	0	0	1	1	3	2024-06-14	2024-06-17	3	1	1	1	0	0	0	0	0	0	1	cefazolin	1	1	1	1	0	0	1	1	2024-06-18	0	0	4	1	2024-06-20
77	2024-06-17	2024-07-02	15	69	2	2	1	0	0	1	0	0	0		Staphylococcus hominis	0	0	0	1	0	1	2024-06-17	2024-06-17	0	0	0	0	0	0	0	0	0	0	1	cefazolin gentamycin rifampin	0	1	1	1	0	0	1	0					1	2024-06-19
78	2024-06-20	2024-06-23	3	77	2	3	0	0	0	0	0	0	0		Staphylococcus epidermidis	0	0	0	1	0	1	2024-06-20	2024-06-20	0	0	0	0	0	0	0	0	0	0	0		0	1	1	1	0	0	1	0					0
79	2024-06-21	2024-06-27	6	58	2	2	0	0	0	0	0	0	1	mod MS	Staphylococcus epidermidis	0	0	0	1	0	1	2024-06-21	2024-06-21	0	0	0	0	0	0	0	0	0	0	1	ceftriaxone	0	0	1	0	0	1	0	1	2024-06-24	0	0	3	0
80	2024-06-28	2024-07-12	14	68	2	2	1	0	0	0	0	0	1	G1DD	Staphylococcus epidermidis	0	0	0	1	0	1	2024-06-28	2024-06-28	0	0	0	0	0	0	0	0	0	0	1	cefazolin	0	0	1	0	0	1	1	1	2024-07-03	0	1	5	0
81	2024-05-02	2024-05-09	7	84	1	3	0	0	0	0	0	0	0		Staphylococcus epidermidis	0	0	0	1	0	1	2024-05-02	2024-05-02	0	0	0	0	0	0	0	0	0	0	1	vanc cefepime	0	0	1	0	0	1	1	0					0
82	2024-04-29	2024-05-20	21	72	2	2	0	0	0	0	0	0	0		Staphylococcus epidermidis	0	0	0	1	0	1	2024-05-05	2024-05-05	0	0	0	0	0	0	0	0	0	0	1	vanc	0	1	1	1	0	0	1	1	2024-05-07	0	1	2	0
83	2024-05-06	2024-05-09	3	72	2	5	0	0	0	0	0	0	0		Staphylococcus epidermidis	0	0	0	1	0	1	2024-05-06	2024-05-06	0	0	0	0	0	0	0	0	0	0	1	vanc	0	0	1	0	0	1	1	0					0
84	2024-05-06	2024-05-10	4	42	1	2	0	0	0	0	0	0	0		Staphylococcus epidermidis	0	0	0	1	0	1	2024-05-06	2024-05-06	0	0	0	0	0	0	0	0	0	0	1	vanc cefepime	0	0	1	0	0	1	1	0					0
85	2024-05-07	2024-05-24	17	57	1	2	0	0	0	0	0	0	0		Staphylococcus capitis	0	0	0	1	0	1	2024-05-07	2024-05-07	0	0	0	0	0	0	0	0	0	0	1	ertapenenm	1	1	0	0	1	0	0	1	2024-05-20	0	0	13	0
86	2024-05-09	2024-05-31	22	57	2	2	0	0	0	0	0	0	0		Staphylococcus epidermidis	0	0	0	1	0	1	2024-05-09	2024-05-09	0	0	0	0	0	0	0	0	0	0	1	vanc	0	1	0	0	1	0	1	1	2024-05-15	0	0	6	0
87	2024-05-09	2024-05-13	4	74	1	2	0	0	0	0	0	0	0		Staphylococcus epidermidis	0	0	0	1	0	1	2024-05-09	2024-05-09	0	0	0	0	0	0	0	0	0	0	0		0	0	1	0	0	1	1	0					0
88	2024-05-11	2024-05-15	4	90	2	2	1	0	1	0	0	0	1	sev AS s/p TAVR, G2DD	Staphylococcus epidermidis	0	0	0	1	0	1	2024-05-11	2024-05-11	0	0	0	0	0	0	0	0	0	0	0		0	0	1	0	0	1	1	1	2024-05-15	0	1	4	0
89	2024-05-11	2024-05-14	3	83	1	2	1	0	0	0	0	0	1	G3DD	Staphylococcus epidermidis	0	0	0	1	0	1	2024-05-11	2024-05-11	0	0	0	0	0	0	0	0	0	0	1	vanc	0	0	1	0	0	1	1	1	2024-05-14	0	0	3	0
90	2024-05-13	2024-05-24	11	62	2	2	0	0	0	0	0	0	0		Staphylococcus epidermidis	0	0	0	1	0	1	2024-05-13	2024-05-13	0	0	0	0	0	0	0	0	0	0	1	vanc	0	0	1	0	0	1	1	0					0
91	2024-05-13	2024-05-18	5	94	2	2	0	0	0	0	0	0	0		Staphylococcus epidermidis	0	0	0	1	0	1	2024-05-13	2024-05-13	0	0	0	0	0	0	0	0	0	0	1	ceftriaxone	0	0	1	0	0	1	1	1	2024-05-14	0	0	1	0
92	2024-05-15	2024-05-18	3	79	1	4	1	0	0	0	0	0	1	HFrEF, mod MR	Staphylococcus hominis	0	0	0	1	0	1	2024-05-15	2024-05-15	0	0	0	0	0	0	0	0	0	0	1	vanc ceftriaxone	0	0	1	0	0	1	1	1	2024-05-17	0	0	2	0
93	2024-05-18	2024-05-27	9	45	2	2	0	0	0	0	0	0	0		Staphylococcus haemolyticus	0	0	0	1	0	1	2024-05-18	2024-05-18	0	0	0	0	0	0	0	0	0	0	1	vanc	0	0	1	0	0	1	1	0					0
94	2024-05-21	2024-05-28	7	75	1	2	0	0	0	0	0	0	0		Staphylococcus epidermidis	0	0	0	1	0	1	2024-05-21	2024-05-21	0	0	0	0	0	0	0	0	0	0	1	ceftriaxone	0	0	1	0	0	1	1	1	2024-05-28	0	0	7	0
95	2024-05-22	2024-05-27	5	90	1	2	1	0	0	0	0	0	1	mod TR, sev biatrial enlarge	Staphylococcus epidermidis	0	0	0	1	1	2	2024-05-22	2024-05-22	0	0	0	0	0	0	0	0	0	0	1	cefepime	0	0	1	0	0	1	1	1	2024-05-24	0	0	2	0
96	2024-05-23	2024-06-01	9	88	1	3	0	0	0	0	0	0	0		Staphylococcus pettenkoferi	0	0	0	1	0	1	2024-05-24	2024-05-24	0	0	0	0	0	0	0	0	0	0	1	vanc cefepime	0	0	1	0	0	1	1	0					0
97	2024-05-26	2024-05-30	4	96	2	2	0	0	0	0	0	0	0		Staphylococcus capitis	0	0	0	1	0	1	2024-05-26	2024-05-26	0	0	0	0	0	0	0	0	0	0	1	vanc	0	0	1	0	0	1	1	0					0
98	2024-05-27	2024-06-02	6	75	2	3	1	0	0	0	0	0	1	HFrEF, sev thickened MV AV	Staphylococcus epidermidis	0	0	0	1	0	1	2024-05-27	2024-05-27	0	0	0	0	0	0	0	0	0	0	1	vanc	0	0	1	0	0	1	1	1	2024-05-28	0	1	1	0
99	2024-05-27	2024-06-10	14	72	1	2	0	0	0	0	0	0	0		Staphylococcus hominis	0	0	0	1	0	1	2024-05-27	2024-05-27	0	0	0	0	0	0	0	0	0	0	1	vanc	0	0	1	0	0	1	1	0					0
100	2024-05-30	2024-05-31	1	39	1	3	0	0	0	0	0	0	0		Staphylococcus epidermidis	0	0	0	1	0	1	2024-05-30	2024-05-30	0	0	0	0	0	0	0	0	0	0	1	ceftriaxone	0	0	1	0	0	1	1	0					0
101	2024-04-02	2024-04-10	8	90	2	2	1	0	0	1	0	0	1	mod MR	Staphylococcus epidermidis	0	0	0	1	0	1	2024-04-02	2024-04-02	0	0	0	0	0	0	0	0	0	0	1	ampicillin sulb	0	0	1	0	0	1	1	0					0
102	2024-04-03	2024-04-07	4	92	2	2	0	0	0	0	0	0	0		Staphylococcus epidermidis	0	0	0	1	0	1	2024-04-03	2024-04-03	0	0	0	0	0	0	0	0	0	0	1	vanc cefepime	0	0	1	0	0	1	1	0					0
103	2024-04-08	2024-07-15	98	51	1	2	1	0	0	0	1	0	1	HFrEF	Staphylococcus epidermidis	0	0	0	1	0	1	2024-04-08	2024-04-08	0	1	0	0	1	0	0	0	0	0	1	cefazolin	0	0	1	0	0	1	1	1	2024-04-09	0	0	1	0
104	2024-04-10	2024-04-12	2	32	1	2	0	0	0	0	0	0	0		Staphylococcus epidermidis	0	0	0	1	0	1	2024-04-10	2024-04-10	0	0	0	0	0	0	0	0	0	0	0		0	0	1	0	0	1	1	0					0
105	2024-04-13	2024-04-19	6	81	2	2	0	0	0	0	0	0	1	G1DD	Staphylococcus epidermidis	0	0	0	1	0	1	2024-04-13	2024-04-13	0	1	0	0	0	0	0	0	1	0	1	vanc	0	0	1	0	0	1	1	1	2024-04-17	0	0	4	0
106	2024-04-14	2024-04-30	16	66	1	2	0	0	0	0	0	0	0		Staphylococcus haemolyticus	0	0	0	1	1	2	2024-04-14	2024-04-15	1	0	0	0	0	0	0	0	0	0	1	vanc	0	1	1	1	0	0	1	1	2024-04-19	0	0	5	0
107	2024-04-16	2024-04-19	3	79	1	2	1	0	1	0	0	0	1	G1DD, s/p TAVR	Staphylococcus epidermidis	0	0	0	1	0	1	2024-04-16	2024-04-16	0	0	0	0	0	0	0	0	0	0	1	ceftriaxone	0	0	1	0	0	1	1	1	2024-04-18	0	0	2	0
108	2024-04-16	2024-04-30	14	78	2	2	1	0	1	0	0	0	1	G2DD, s/p TAVR	Staphylococcus epidermidis	0	0	0	1	1	4	2024-04-16	2024-04-22	6	0	0	0	0	0	0	0	0	0	1	vanc	1	1	1	1	0	0	1	1	2024-04-17	0	1	1	1	2024-04-22
109	2024-03-14	2024-05-08	55	38	1	2	0	0	0	0	0	0	0		Staphylococcus epidermidis	0	0	0	1	0	1	2024-04-18	2024-04-18	0	0	0	0	0	0	0	0	0	0	1	vanc	0	1	1	1	0	0	1	0					0
110	2024-04-20	2024-04-26	6	86	2	2	0	0	0	0	0	0	0		Staphylococcus hominis	0	0	0	1	0	1	2024-04-20	2024-04-20	0	0	0	0	0	0	0	0	0	0	1	vanc	0	1	1	1	0	0	1	0					0
111	2024-04-23	2024-05-01	8	58	2	2	1	0	0	0	0	0	1	G1DD, mod TR	Staphylococcus haemolyticus	0	0	0	1	0	1	2024-04-23	2024-04-23	0	0	0	0	0	0	0	0	0	0	1	vanc	0	0	1	0	0	1	1	0					0
112	2024-04-24	2024-04-30	6	28	1	2	0	0	0	0	0	0	0		Staphylococcus capitis	0	0	0	1	0	1	2024-04-24	2024-04-24	0	0	0	0	0	0	0	0	0	0	1	vanc	0	0	1	0	0	1	1	0					0
113	2024-04-25	2024-05-19	24	89	2	3	0	0	0	0	0	0	0		Staphylococcus hominis	0	0	0	1	0	1	2024-04-25	2024-04-25	0	0	0	0	0	0	0	0	0	0	1	cefepime	0	0	1	0	0	1	1	1	2024-05-07	0	1	12	0
114	2024-04-26	2024-05-17	21	88	2	2	1	0	0	1	0	0	1	mod TR	Staphylococcus epidermidis	0	0	0	1	0	1	2024-04-26	2024-04-26	0	0	0	0	0	0	0	0	0	0	1	vanc meropenem	0	0	1	0	0	1	0	1	2024-05-07	0	1	11	0
115	2024-04-27	2024-05-01	4	43	2	2	1	0	0	0	0	0	1	MVP s/p repair	Staphylococcus capitis	0	0	0	1	0	1	2024-04-27	2024-04-27	0	0	0	0	0	0	0	0	0	0	1	vanc	0	0	1	0	0	1	1	1	2024-04-29	0	0	2	0
116	2024-04-30	2024-05-07	7	92	1	2	0	0	0	0	0	0	0		Staphylococcus capitis	0	0	0	1	0	1	2024-04-30	2024-04-30	0	0	0	0	0	0	0	0	0	0	1	vanc cefepime	0	0	1	0	0	1	1	0					0
117	2024-03-01	2024-03-08	7	82	2	2	0	0	0	0	0	0	0		Staphylococcus capitis	0	0	0	1	0	1	2024-03-01	2024-03-01	0	0	0	0	0	0	0	0	0	0	1	ceftriaxone	0	0	1	0	0	1	1	0					0
118	2024-03-02	2024-03-09	7	44	2	3	1	0	0	0	1	0	0		Staphylococcus hominis	0	0	0	1	0	1	2024-03-02	2024-03-02	0	0	0	0	0	0	0	0	0	0	1	vanc	0	1	1	1	0	0	1	0					0
119	2024-03-03	2024-03-14	11	65	1	2	0	0	0	0	0	0	0		Staphylococcus epidermidis	0	0	0	1	0	1	2024-03-03	2024-03-03	0	0	0	0	0	0	0	0	0	0	1	doxycycline	0	0	1	0	0	1	1	1	2024-03-06	0	0	3	0
120	2024-03-03	2024-03-07	4	77	2	3	0	0	0	0	0	0	0		Staphylococcus capitis	0	0	0	1	0	1	2024-03-03	2024-03-03	0	0	0	0	0	0	0	0	0	0	1	vanc	0	1	1	1	0	0	1	1	2024-03-06	0	0	3	0
121	2024-03-05	2024-03-12	7	70	1	2	0	0	0	0	0	0	0		Staphylococcus epidermidis	0	0	0	1	0	1	2024-03-05	2024-03-05	0	0	0	0	0	0	0	0	0	0	1	vanc cefepime	0	0	1	0	0	1	1	1	2024-03-11	0	1	6	0
122	2024-03-06	2024-03-09	3	70	1	3	0	0	0	0	0	0	0		Staphylococcus hominis	0	0	0	1	0	1	2024-03-06	2024-03-06	0	0	0	0	0	0	0	0	0	0	1	ceftriaxone	0	0	1	0	0	1	1	0					0
123	2024-03-08	2024-03-11	3	75	1	3	1	0	0	0	0	0	1	G1DD	Staphylococcus hominis	0	0	0	1	0	1	2024-03-08	2024-03-08	0	0	0	0	0	0	0	0	0	0	1	ceftriaxone	0	0	1	0	0	1	1	1	2024-03-10	0	1	2	0
124	2024-03-08	2024-03-11	3	60	2	3	0	0	0	0	0	0	0		Staphylococcus hominis	0	0	0	1	0	1	2024-03-08	2024-03-08	0	0	0	0	0	0	0	0	0	0	1	ceftriaxone	0	0	1	0	0	1	1	0					0
125	2024-03-10	2024-03-22	12	71	1	2	1	0	0	0	1	0	0		Staphylococcus epidermidis	0	0	0	1	0	1	2024-03-10	2024-03-10	0	1	0	0	1	0	0	0	0	0	1	linezolid levofloxacin	0	1	1	1	0	0	1	1	2024-03-11	0	0	1	0
126	2024-03-11	2024-03-16	5	80	2	2	1	0	0	0	0	0	1	G1DD	Staphylococcus hominis	0	0	0	1	0	1	2024-03-11	2024-03-11	0	0	0	0	0	0	0	0	0	0	1	cefuroxime	0	1	1	1	0	0	0	1	2024-03-15	0	0	4	0
127	2024-03-11	2024-03-19	8	61	1	3	0	0	0	0	0	0	0		Staphylococcus hominis	0	0	0	1	0	1	2024-03-11	2024-03-11	0	0	0	0	0	0	0	0	0	0	1	cefepime	0	1	1	1	0	0	1	1	2024-03-13	0	0	2	0
128	2024-03-14	2024-03-26	12	54	1	2	1	0	0	0	1	0	0		Staphylococcus epidermidis	0	0	0	1	0	1	2024-03-14	2024-03-14	0	1	0	0	1	0	0	0	0	0	1	daptomycin	0	1	1	1	0	0	1	1	2024-03-19	0	0	5	0
129	2024-03-14	2024-03-27	13	74	1	2	0	0	0	0	0	0	0		Staphylococcus epidermidis	0	0	0	1	0	1	2024-03-14	2024-03-14	0	0	0	0	0	0	0	0	0	0	1	vanc cefepime	0	0	1	0	0	1	0	0					0
130	2024-03-16	2024-03-19	3	53	1	5	0	0	0	0	0	0	0		Staphylococcus epidermidis	0	0	0	1	0	1	2024-03-16	2024-03-16	0	0	0	0	0	0	0	0	0	0	1	ceftriaxone	0	0	1	0	0	1	1	0					0
131	2024-03-17	2024-03-25	8	23	2	2	0	0	0	0	0	0	0		Staphylococcus epidermidis	0	0	0	1	0	1	2024-03-17	2024-03-17	0	0	0	0	0	0	0	0	0	0	1	vanc	0	1	0	0	1	0	1	1	2024-03-22	0	0	5	0
132	2024-03-12	2024-04-19	38	41	1	3	1	0	0	0	1	0	0		Staphylococcus epidermidis	0	0	0	1	0	1	2024-03-19	2024-03-19	0	1	0	0	1	0	0	0	0	0	1	vanc	1	1	1	1	0	0	1	1	2024-03-21	0	0	2	0
133	2024-03-21	2024-03-26	5	73	2	2	1	0	0	0	1	0	0		Staphylococcus hominis	0	0	0	1	0	1	2024-03-21	2024-03-21	0	0	0	0	0	0	0	0	0	0	1	vanc cefepime	0	1	1	1	0	0	1	0					0
134	2024-03-27	2024-04-05	9	59	2	2	0	0	0	0	0	0	0		Staphylococcus epidermidis	0	0	0	1	0	1	2024-03-27	2024-03-27	0	0	0	0	0	0	0	0	0	0	1	ceftriaxone	0	1	1	1	0	0	1	0					0
				13.7197	68.4328																	1.84328
				14.8865	16.3369																	1.51113
[truncated: 11 more columns]

## Sheet: Data wo TEE used
Subject #	Admission Date	Discharge Date	LOS	Age	Sex	Race	Comorbidity present (at least 1)?	IVDU	Prosthetic Valve	Intracardiac device	Chronic in-line cath	Previous IE	Cardio-structural abnormality	Type of abnormality	Bcx initial	Bcx repeat positive?	Total sets of positive Bcx	Date initial positive Bcx	Date last positive Bcx	Days Bcx positive	Alternative source of infx?	OM?	Cellulitis or open wound?	Line related?	Abscess?	Intra-abdominal?	PNA?	UTI?	Other	Abx used?	Abx tx? (ended w/)	Planned longterm abx tx (~4-6wks) +/- PICC?	fever?	< 3 days defervescence or remained afebrile?	WBC downtrend or remained nrml?	TTE used?	TTE date	TTE new valvular veg?	TTE new worsened fxnl findings from previous TTEs?	Time to TTE	TEE used?	TEE date	TEE new valvular veg?	TEE new anatomical/fxnl findings?	Abx/tx changed based off TEE?	Time to TEE	Pt required ICU level of care?	No comorbid, Alt source infxn, Abx used, Defervesced, WBC resolve/nrml	Defervesced, WBC resolve/nrml
2	2024-06-03			78	1	3	0	0	0	0	0	0	0		Methicillin-Resistant Staphylococcus aureus	1	6	2024-06-03	2024-06-07	4	1	1	0	0	0	0	0	0	0	1	Daptomycin	1	1	1	1	1	2024-06-05	0	0	2	0						1	1	1
5	2024-06-10	2024-06-13	3	71	1	2	1	0	0	0	1	1	1	G3DD, sev LA dilation	Staphylococcus aureus	1	2	2024-06-10	2024-06-11	1	1	0	0	0	1	0	0	0	0	1	vanc zosyn	1	1	1	0	1	2024-06-11	1	1	1	0						1	0	0
6	2024-06-11	2024-06-22	11	81	1	2	1	0	0	0	0	0	1	mod MR, TR, sev biatrial enlarge	Staphylococcus aureus	1	4	2024-06-11	2024-06-15	4	1	0	1	0	0	1	0	0	0	1	Ertapenem cefazolin	0	1	1	0	1	2024-06-12	0	0	1	0						1	0	0
7	2024-06-10	2024-07-12	32	45	2	2	0	0	0	0	0	0	0		Staphylococcus aureus	0	1	2024-06-12	2024-06-12	0	0	0	0	0	0	0	0	0	0	1	cefazolin	1	0	1	1	1	2024-06-14	0	0	2	0						1	0	1
8	2024-06-13	2024-06-23	10	60	1	3	1	0	0	0	0	0	1	G2DD	Staphylococcus aureus	1	2	2024-06-13	2024-06-14	1	1	0	0	0	1	0	0	0	0	1	cefazolin	1	1	1	1	1	2024-06-14	0	0	1	0						0	0	1
9	2024-06-15	2024-06-27	12	64	2	2	1	0	0	0	1	0	0		Staphylococcus aureus	1	2	2024-06-20	2024-06-21	1	1	0	1	0	0	0	0	0	0	1	cefazolin	1	1	1	1	1	2024-06-24	0	0	4	0						0	0	1
10	2024-06-25	2024-07-02	7	46	1	2	1	1	0	0	1	1	1	1/4/24 veg seen, sev TR,	Methicillin-Resistant Staphylococcus aureus	1	5	2024-06-25	2024-06-30	5	1	1	1	0	1	0	0	0	0	1	Daptomycin	1	1	1	1	1	2024-06-25	1	1	0	0						0	0	1
11	2024-06-27	2024-07-28	31	74	1	2	1	0	0	0	0	0	1	sev calc AV, mod AS, mod TR	Staphylococcus aureus	0	1	2024-06-27	2024-06-27	0	1	0	1	0	0	0	1	0	0	1	vanc cefepime	0	1	1	0	1	2024-06-28	0	1	1	0						1	0	0
12	2024-05-01	2024-05-11	10	70	1	5	1	0	0	0	1	0	1	G1DD	Staphylococcus aureus	1	2	2024-05-01	2024-05-03	2	1	0	0	1	0	0	0	0	0	1	cefazolin	1	1	1	1	1	2024-05-07	0	1	6	0						0	0	1
13	2024-05-02	2024-05-24	22	91	2	2	1	0	0	0	0	0	1	HFrEF	Staphylococcus aureus	1	2	2024-05-02	2024-05-03	1	1	0	0	0	1	0	0	0	0	1	cefazolin	1	1	1	1	1	2024-05-06	0	0	4	0						0	0	1
14	2024-05-07	2024-05-21	14	71	2	2	1	0	0	0	1	0	0		Staphylococcus aureus	1	3	2024-05-07	2024-05-10	3	1	0	1	1	0	0	0	0	0	1	cefazolin	1	1	0	1	1	2024-05-08	0	0	1	0						0	0	0
16	2024-05-08	2024-05-23	15	83	2	2	1	0	0	0	0	0	1	PFO, sev biatrial enlarge, G1DD, mod LVH	Staphylococcus aureus	1	3	2024-05-17	2024-05-19	2	0	0	0	0	0	0	0	0	0	1	nafcillin	1	1	1	1	1	2024-05-20	0	0	3	0						1	0	1
17	2024-05-26	2024-06-15	20	59	1	3	1	0	0	0	0	0	1	G1DD, mod mitral annular calc	Staphylococcus aureus	1	2	2024-05-28	2024-05-29	1	1	0	1	0	0	0	0	0	0	1	cefazolin	1	1	1	1	1	2024-05-30	1	0	2	0						0	0	1
19	2024-04-11	2024-04-16	5	65	2	2	1	0	0	0	0	0	1	thickened AV leaf	Methicillin-Resistant Staphylococcus aureus	1	3	2024-04-11	2024-04-12	1	0	0	0	0	0	0	0	0	1	1	Daptomycin	1	0	1	1	1	2024-04-12	0	1	1	0						0	0	1
20	2024-04-10	2024-04-19	9	85	1	2	0	0	0	0	0	0	0		Staphylococcus aureus	1	2	2024-04-14	2024-04-14	0	0	0	0	0	0	0	0	0	0	1	cefazolin	1	1	1	1	1	2024-04-18	0	0	4	0						0	0	1
21	2024-04-18	2024-04-26	8	85	2	2	1	0	0	0	0	0	1	G1DD	Staphylococcus aureus	1	3	2024-04-18	2024-04-20	2	1	0	0	0	1	0	0	0	0	1	cefazolin	1	1	0	1	1	2024-04-22	0	1	4	0						0	0	0
25	2024-04-23	2024-05-11	18	66	1	2	1	0	0	0	0	0	1	G2DD	Staphylococcus aureus	1	4	2024-04-23	2024-04-26	3	1	1	0	0	1	0	0	0	0	1	cefazolin	1	0	1	0	1	2024-04-29	0	0	6	0						1	0	0
26	2024-04-24	2024-05-12	18	59	2	2	1	0	0	0	1	0	1	G1DD	Staphylococcus aureus	1	3	2024-04-24	2024-04-27	3	1	0	0	1	0	0	0	0	0	1	cefazolin	1	1	1	1	1	2024-05-03	1	0	9	0						1	0	1
27	2024-04-21	2024-04-30	9	72	1	2	1	0	0	0	0	0	1	anterolat hypokinesis, apical kinesis, HFmrEF	Staphylococcus aureus	1	2	2024-04-25	2024-04-27	2	1	1	0	0	0	0	0	0	1	1	cefazolin	1	1	1	1	1	2024-04-26	0	0	1	0						0	0	1
28	2024-04-24	2024-05-10	16	71	2	2	1	0	0	0	0	0	1	mod TR, G1DD	Staphylococcus aureus	1	2	2024-04-27	2024-04-28	1	1	1	0	0	1	0	0	0	1	1	nafcillin	1	1	1	1	1	2024-05-02	0	0	5	0						0	0	1
29	2024-02-25	2024-06-11	107	54	1	3	0	0	0	0	0	0	0		Methicillin-Resistant Staphylococcus aureus	1	4	2024-04-25	2024-04-28	3	1	0	1	0	0	0	0	0	0	1	vanc	1	1	0	1	1	2024-04-29	0	0	4	0						1	0	0
31	2024-02-21	2024-03-17	25	82	1	2	1	0	0	0	1	0	1	sev AS	Staphylococcus aureus	1	2	2024-02-29	2024-03-01	1	1	0	0	1	0	0	0	1	0	1	vanc	1	0	1	0	1	2024-03-01	0	1	1	0						1	0	0
34	2024-03-13	2024-03-26	13	95	2	4	0	0	0	0	0	0	0		Staphylococcus aureus	1	5	2024-03-13	2024-03-17	4	1	0	0	0	0	0	0	0	1	1	cefazolin	1	1	1	1	1	2024-03-15	0	0	2	0						0	1	1
36	2024-03-27	2024-03-29	2	64	2	2	1	0	0	0	0	0	1	G2DD	Staphylococcus aureus	1	3	2024-03-27	2024-03-28	1	0	0	0	0	0	0	0	0	0	1	cefazolin	1	1	1	0	1	2024-03-28	1	1	1	0						1	0	0
37	2024-03-28	2024-04-08	11	87	2	2	1	0	0	1	0	0	0	HFrEF	Staphylococcus aureus	1	4	2024-03-28	2024-03-31	3	0	0	0	0	0	0	0	0	0	1	nafcillin	1	1	0	0	1	2024-04-01	0	0	4	0						0	0	0
39	2024-05-31	2024-06-12	12	70	2	2	0	0	0	0	0	0	0		Streptococcus mutans	0	1	2024-06-01	2024-06-01	0	1	1	0	0	0	0	0	0	0	1	ceftriaxone	1	1	1	1	1	2024-06-05	0	1	4	0						0	1	1
40	2024-06-06	2024-06-10	4	78	2	2	1	0	0	0	1	0	0		Streptococcus mitis group	0	1	2024-06-06	2024-06-06	0	1	0	0	0	0	0	0	0	1	1	ceftriaxone	0	1	1	1	0					0						0	0	1
42	2024-06-12	2024-06-19	7	83	1	5	0	0	0	0	0	0	0		Streptococcus mitis group	0	1	2024-06-12	2024-06-12	0	1	0	0	0	1	0	0	0	0	1	ceftriaxone	1	1	1	1	1	2024-06-14	1	0	2	0						0	1	1
43	2024-06-17	2024-06-22	5	65	1	3	0	0	0	0	0	0	0		Streptococcus mitis group	0	1	2024-06-17	2024-06-17	0	1	0	0	0	0	0	1	0	0	1	ceftriaxone	0	0	1	1	1	2024-06-20	0	1	3	0						0	1	1
44	2024-06-30	2024-07-10	10	55	2	2	1	0		0	1	0	0		Streptococcus constellatus	0	1	2024-06-30	2024-06-30	0	0	0	0	0	0	0	0	0	0	1	levofloxacin	0	1	0	1	1	2024-07-02	0	0	2	0						0	0	0
47	2024-05-21	2024-06-04	14	75	1	2	0	0	0	0	0	0	0		Streptococcus mitis group	0	1	2024-05-21	2024-05-21	0	0	0	0	0	0	0	0	0	0	1	ceftriaxone	0	0	1	1	1	2024-05-24	0	0	3	0						0	0	1
48	2024-05-29	2024-06-05	7	54	1	3	0	0	0	0	0	0	0		Streptococcus constellatus	0	1	2024-05-29	2024-05-29	0	1	0	0	0	0	1	0	0	0	1	amoxicillin clav	0	0	1	1	0					0						0	1	1
49	2024-04-13	2024-05-08	25	78	2	2	0	0	0	0	0	0	0		Streptococcus anginosus	0	1	2024-04-13	2024-04-13	0	1	0	0	0	0	0	0	0	1	1	meropenem	1	1	0	0	1	2024-04-20	0	0	7	0						1	0	0
50	2024-04-27	2024-05-23	26	36	1	3	0	0	0	0	0	0	0		Streptococcus constellatus	0	1	2024-04-27	2024-04-27	0	1	0	0	0	1	1	0	0	0	1	ceftriaxone	1	1	1	0	1	2024-05-01	0	0	4	0						1	0	0
51	2024-04-28	2024-05-03	5	95	2	2	0	0	0	0	0	0	0		Streptococcus mitis group	0	1	2024-04-28	2024-04-28	0	0	0	0	0	0	0	0	0	0	1	ceftriaxone	0	0	1	1	1	2024-05-02	0	0	4	0						0	0	1
53	2024-03-06	2024-04-03	28	37	2	2	0	0	0	0	0	0	0		Streptococcus anginosus	0	1	2024-03-06	2024-03-06	0	1	0	1	0	1	0	0	0	0	1	cefazolin levofloxacin	1	1	1	1	1	2024-03-08	0	0	2	0						1	1	1
54	2024-03-08	2024-03-15	7	86	1	2	0	0	0	0	0	0	1	G1DD, mod AS	Streptococcus mutans	0	1	2024-03-08	2024-03-08	0	1	0	0	0	0	0	0	1	0	1	amoxicillin	0	0	1	1	1	2024-03-12	0	1	4	0						0	1	1
55	2024-03-18	2024-03-26	8	74	2	2	0	0	0	0	0	0	1	G1DD	Streptococcus mitis group	0	1	2024-03-18	2024-03-18	0	1	0	0	0	1	0	0	0	1	1	ceftriaxone	1	0	1	1	0					0						0	1	1
56	2024-06-15	2024-06-24	9	87	2	5	0	0	0	0	0	0	0	G1DD	Enterococcus faecalis	1	2	2024-06-14	2024-06-15	1	1	0	0	0	0	0	0	1	0	1	amoxicillin	0	1	1	1	1	2024-06-19	0	0	5	0						0	1	1
57	2024-06-16			55	2	2	1	0	0	1	0	0	1	HCM	Enterococcus faecalis	1	4	2024-06-26	2024-06-29	3	0	0	0	0	0	0	0	0	0	1	ceftriaxone ampicillin	1	1	1	1	1	2024-07-12	0	1	16	0						1	0	1
58	2024-06-26	2024-07-11	15	86	2	2	1	0	0	1	0	0	0		Enterococcus faecalis	0	1	2024-06-28	2024-06-28	0	1	0	0	0	0	0	0	1	0	1	amoxicillin	0	1	1	1	1	2024-07-01	0	1	3	0						0	0	1
59	2024-05-09	2024-05-16	7	77	2	5	0	0	0	0	1	0	1	G1DD	Vancomycin resistant Enterococcus faecalis	1	4	2024-05-09	2024-05-16	7	1	0	0	1	0	1	0	0	0	1	Daptomycin	1	0	1	0	1	2024-05-13	0	0	4	0						1	0	0
60	2024-05-13	2024-06-01	19	81	1	2	1	0	0	1	0	0	1	HFrEF	Enterococcus faecalis	1	2	2024-05-13	2024-05-14	1	1	0	0	0	0	1	0	0	0	1	ceftriaxone ampicillin	1	1	1	1	1	2024-05-17	0	1	4	0						0	0	1
61	2024-03-30	2024-04-05	6	87	2	3	1	0	0	1	0	0	1	G1DD, mod TR	Enterococcus faecalis	1	3	2024-03-31	2024-04-02	2	0	0	0	0	0	0	0	0	0	1	piperacillin tazo	1	0	1	1	1	2024-04-01	0	1	1	0						0	0	1
62	2024-04-16	2024-04-21	5	47	1	2	1	1	0	0	0	0	1	sev TR	Enterococcus faecalis	1	4	2024-04-16	2024-04-21	5	1	0	1	0	0	0	0	0	0	1	ceftriaxone ampicillin	1	1	1	1	1	2024-04-18	1	0	2	0						0	0	1
63	2024-04-16	2024-05-30	44	54	1	2	1	0	0	0	1	0	0		Enterococcus faecalis	1	5	2024-04-16	2024-04-19	3	1	0	0	1	0	0	0	0	0	1	ceftriaxone ampicillin	1	1	1	1	1	2024-04-19	0	0	3	0						1	0	1
64	2024-04-27	2024-05-07	10	82	1	2	1	0	0	0	0	0	1	mod AS	Enterococcus faecalis	0	1	2024-04-29	2024-04-29	0	1	0	0	0	0	0	0	1	0	1	ampicillin	0	1	1	1	1	2024-04-29	0	1	0	0						0	0	1
66	2024-05-21	2024-05-31	10	71	2	2	1	0	0	0	1	0	1	mod TR, G1DD	Vancomycin resistant Enterococcus faecalis	0	1	2024-05-21	2024-05-21	0	1	0	0	1	0	0	0	0	0	1	Daptomycin	1	0	1	1	1	2024-05-24	0	0	3	0						0	0	1
67	2024-04-16	2024-05-30	44	54	1	2	1	0	0	0	1	0	0		Enterococcus faecalis	1	5	2024-04-16	2024-04-19	3	1	0	0	1	0	1	0	0	0	1	ceftriaxone ampicillin	1	1	1	1	1	2024-04-19	0	0	3	0						0	0	1
68	2024-06-01	2024-06-06	5	69	1	2	1	0	0	0	1	0	0		Staphylococcus epidermidis	0	1	2024-06-01	2024-06-01	0	0	0	0	0	0	0	0	0	0	1	levofloxacin	0	1	1	1	0					0						0	0	1
69	2024-06-04	2024-06-14	10	53	1	2	0	0	0	0	0	0	0		Staphylococcus epidermidis	0	1	2024-06-04	2024-06-04	0	0	0	0	0	0	0	0	0	0	1	vanc cefepime	0	0	1	1	0					0						0	0	1
70	2024-06-06	2024-07-04	28	73	2	2	0	0	0	0	0	0	0		Staphylococcus saccarolyticus	0	1	2024-06-06	2024-06-06	0	1	0	0	0	0	0	0	0	1	1	vanc	0	0	1	0	1	2024-06-10	0	1	4	0						1	0	0
71	2024-06-06	2024-06-14	8	69	1	2	1	0	0	0	0	0	1	G1DD	Staphylococcus pettenkoferi	0	1	2024-06-06	2024-06-06	0	0	0	0	0	0	0	0	0	0	1	ampicillin sulb	0	1	0	1	0					0						0	0	0
72	2024-06-10	2024-06-14	4	63	2	2	0	0	0	0	0	0	0		Staphylococcus epidermidis	0	1	2024-06-10	2024-06-10	0	0	0	0	0	0	0	0	0	0	1	vanc cefepime	0	0	1	1	0					0						0	0	1
73	2024-06-11	2024-06-21	10	76	2	2	0	0	0	0	0	0	0		Staphylococcus epidermidis	0	1	2024-06-11	2024-06-11	0	0	0	0	0	0	0	0	0	0	1	cefazolin ampicillin sulb	0	0	1	1	1	2024-06-12	0	0	1	0						0	0	1
74	2024-06-11	2024-06-20	9	80	1	3	1	0	0	0	1	0	1	G3DD	Staphylococcus pettenkoferi	0	1	2024-06-11	2024-06-11	0	1	0	0	1	0	0	0	0	0	1	vanc	0	0	1	1	1	2024-06-14	0	1	3	0						0	0	1
75	2024-06-12	2024-06-20	8	81	1	3	0	0	0	0	0	0	0		Staphylococcus epidermidis	0	1	2024-06-12	2024-06-12	0	0	0	0	0	0	0	0	0	0	1	vanc cefepime	0	0	1	1	1	2024-06-13	0	0	1	0						1	0	1
78	2024-06-20	2024-06-23	3	77	2	3	0	0	0	0	0	0	0		Staphylococcus epidermidis	0	1	2024-06-20	2024-06-20	0	0	0	0	0	0	0	0	0	0	0		0	1	1	1	0					0						0	0	1
79	2024-06-21	2024-06-27	6	58	2	2	0	0	0	0	0	0	1	mod MS	Staphylococcus epidermidis	0	1	2024-06-21	2024-06-21	0	0	0	0	0	0	0	0	0	0	1	ceftriaxone	0	0	1	0	1	2024-06-24	0	0	3	0						0	0	0
80	2024-06-28	2024-07-12	14	68	2	2	1	0	0	0	0	0	1	G1DD	Staphylococcus epidermidis	0	1	2024-06-28	2024-06-28	0	0	0	0	0	0	0	0	0	0	1	cefazolin	0	0	1	1	1	2024-07-03	0	1	5	0						0	0	1
81	2024-05-02	2024-05-09	7	84	1	3	0	0	0	0	0	0	0		Staphylococcus epidermidis	0	1	2024-05-02	2024-05-02	0	0	0	0	0	0	0	0	0	0	1	vanc cefepime	0	0	1	1	0					0						0	0	1
82	2024-04-29	2024-05-20	21	72	2	2	0	0	0	0	0	0	0		Staphylococcus epidermidis	0	1	2024-05-05	2024-05-05	0	0	0	0	0	0	0	0	0	0	1	vanc	0	1	1	1	1	2024-05-07	0	1	2	0						0	0	1
83	2024-05-06	2024-05-09	3	72	2	5	0	0	0	0	0	0	0		Staphylococcus epidermidis	0	1	2024-05-06	2024-05-06	0	0	0	0	0	0	0	0	0	0	1	vanc	0	0	1	1	0					0						0	0	1
84	2024-05-06	2024-05-10	4	42	1	2	0	0	0	0	0	0	0		Staphylococcus epidermidis	0	1	2024-05-06	2024-05-06	0	0	0	0	0	0	0	0	0	0	1	vanc cefepime	0	0	1	1	0					0						0	0	1
85	2024-05-07	2024-05-24	17	57	1	2	0	0	0	0	0	0	0		Staphylococcus capitis	0	1	2024-05-07	2024-05-07	0	0	0	0	0	0	0	0	0	0	1	ertapenenm	1	1	0	0	1	2024-05-20	0	0	13	0						0	0	0
86	2024-05-09	2024-05-31	22	57	2	2	0	0	0	0	0	0	0		Staphylococcus epidermidis	0	1	2024-05-09	2024-05-09	0	0	0	0	0	0	0	0	0	0	1	vanc	0	1	0	1	1	2024-05-15	0	0	6	0						1	0	0
87	2024-05-09	2024-05-13	4	74	1	2	0	0	0	0	0	0	0		Staphylococcus epidermidis	0	1	2024-05-09	2024-05-09	0	0	0	0	0	0	0	0	0	0	0		0	0	1	1	0					0						0	0	1
88	2024-05-11	2024-05-15	4	90	2	2	1	0	1	0	0	0	1	sev AS s/p TAVR, G2DD	Staphylococcus epidermidis	0	1	2024-05-11	2024-05-11	0	0	0	0	0	0	0	0	0	0	0		0	0	1	1	1	2024-05-15	0	1	4	0						0	0	1
89	2024-05-11	2024-05-14	3	83	1	2	1	0	0	0	0	0	1	G3DD	Staphylococcus epidermidis	0	1	2024-05-11	2024-05-11	0	0	0	0	0	0	0	0	0	0	1	vanc	0	0	1	1	1	2024-05-14	0	0	3	0						0	0	1
90	2024-05-13	2024-05-24	11	62	2	2	0	0	0	0	0	0	0		Staphylococcus epidermidis	0	1	2024-05-13	2024-05-13	0	0	0	0	0	0	0	0	0	0	1	vanc	0	0	1	1	0					0						0	0	1
91	2024-05-13	2024-05-18	5	94	2	2	0	0	0	0	0	0	0		Staphylococcus epidermidis	0	1	2024-05-13	2024-05-13	0	0	0	0	0	0	0	0	0	0	1	ceftriaxone	0	0	1	1	1	2024-05-14	0	0	1	0						0	0	1
92	2024-05-15	2024-05-18	3	79	1	4	1	0	0	0	0	0	1	HFrEF, mod MR	Staphylococcus hominis	0	1	2024-05-15	2024-05-15	0	0	0	0	0	0	0	0	0	0	1	vanc ceftriaxone	0	0	1	1	1	2024-05-17	0	0	2	0						0	0	1
93	2024-05-18	2024-05-27	9	45	2	2	0	0	0	0	0	0	0		Staphylococcus haemolyticus	0	1	2024-05-18	2024-05-18	0	0	0	0	0	0	0	0	0	0	1	vanc	0	0	1	1	0					0						0	0	1
94	2024-05-21	2024-05-28	7	75	1	2	0	0	0	0	0	0	0		Staphylococcus epidermidis	0	1	2024-05-21	2024-05-21	0	0	0	0	0	0	0	0	0	0	1	ceftriaxone	0	0	1	1	1	2024-05-28	0	0	7	0						0	0	1
95	2024-05-22	2024-05-27	5	90	1	2	1	0	0	0	0	0	1	mod TR, sev biatrial enlarge	Staphylococcus epidermidis	1	2	2024-05-22	2024-05-22	0	0	0	0	0	0	0	0	0	0	1	cefepime	0	0	1	1	1	2024-05-24	0	0	2	0						0	0	1
96	2024-05-23	2024-06-01	9	88	1	3	0	0	0	0	0	0	0		Staphylococcus pettenkoferi	0	1	2024-05-24	2024-05-24	0	0	0	0	0	0	0	0	0	0	1	vanc cefepime	0	0	1	1	0					0						0	0	1
97	2024-05-26	2024-05-30	4	96	2	2	0	0	0	0	0	0	0		Staphylococcus capitis	0	1	2024-05-26	2024-05-26	0	0	0	0	0	0	0	0	0	0	1	vanc	0	0	1	1	0					0						0	0	1
98	2024-05-27	2024-06-02	6	75	2	3	1	0	0	0	0	0	1	HFrEF, sev thickened MV AV	Staphylococcus epidermidis	0	1	2024-05-27	2024-05-27	0	0	0	0	0	0	0	0	0	0	1	vanc	0	0	1	1	1	2024-05-28	0	1	1	0						1	0	1
99	2024-05-27	2024-06-10	14	72	1	2	0	0	0	0	0	0	0		Staphylococcus hominis	0	1	2024-05-27	2024-05-27	0	0	0	0	0	0	0	0	0	0	1	vanc	0	0	1	1	0					0						0	0	1
100	2024-05-30	2024-05-31	1	39	1	3	0	0	0	0	0	0	0		Staphylococcus epidermidis	0	1	2024-05-30	2024-05-30	0	0	0	0	0	0	0	0	0	0	1	ceftriaxone	0	0	1	1	0					0						0	0	1
101	2024-04-02	2024-04-10	8	90	2	2	1	0	0	1	0	0	1	mod MR	Staphylococcus epidermidis	0	1	2024-04-02	2024-04-02	0	0	0	0	0	0	0	0	0	0	1	ampicillin sulb	0	0	1	1	0					0						0	0	1
102	2024-04-03	2024-04-07	4	92	2	2	0	0	0	0	0	0	0		Staphylococcus epidermidis	0	1	2024-04-03	2024-04-03	0	0	0	0	0	0	0	0	0	0	1	vanc cefepime	0	0	1	1	0					0						0	0	1
103	2024-04-08	2024-07-15	98	51	1	2	1	0	0	0	1	0	1	HFrEF	Staphylococcus epidermidis	0	1	2024-04-08	2024-04-08	0	1	0	0	1	0	0	0	0	0	1	cefazolin	0	0	1	1	1	2024-04-09	0	0	1	0						1	0	1
104	2024-04-10	2024-04-12	2	32	1	2	0	0	0	0	0	0	0		Staphylococcus epidermidis	0	1	2024-04-10	2024-04-10	0	0	0	0	0	0	0	0	0	0	0		0	0	1	1	0					0						0	0	1
105	2024-04-13	2024-04-19	6	81	2	2	0	0	0	0	0	0	1	G1DD	Staphylococcus epidermidis	0	1	2024-04-13	2024-04-13	0	1	0	0	0	0	0	0	1	0	1	vanc	0	0	1	1	1	2024-04-17	0	0	4	0						0	1	1
106	2024-04-14	2024-04-30	16	66	1	2	0	0	0	0	0	0	0		Staphylococcus haemolyticus	1	2	2024-04-14	2024-04-15	1	0	0	0	0	0	0	0	0	0	1	vanc	0	1	1	1	1	2024-04-19	0	0	5	0						0	0	1
107	2024-04-16	2024-04-19	3	79	1	2	1	0	1	0	0	0	1	G1DD, s/p TAVR	Staphylococcus epidermidis	0	1	2024-04-16	2024-04-16	0	0	0	0	0	0	0	0	0	0	1	ceftriaxone	0	0	1	1	1	2024-04-18	0	0	2	0						0	0	1
109	2024-03-14	2024-05-08	55	38	1	2	0	0	0	0	0	0	0		Staphylococcus epidermidis	0	1	2024-04-18	2024-04-18	0	0	0	0	0	0	0	0	0	0	1	vanc	0	1	1	1	0					0						1	0	1
110	2024-04-20	2024-04-26	6	86	2	2	0	0	0	0	0	0	0		Staphylococcus hominis	0	1	2024-04-20	2024-04-20	0	0	0	0	0	0	0	0	0	0	1	vanc	0	1	1	1	0					0						0	0	1
111	2024-04-23	2024-05-01	8	58	2	2	1	0	0	0	0	0	1	G1DD, mod TR	Staphylococcus haemolyticus	0	1	2024-04-23	2024-04-23	0	0	0	0	0	0	0	0	0	0	1	vanc	0	0	1	1	0					0						0	0	1
112	2024-04-24	2024-04-30	6	28	1	2	0	0	0	0	0	0	0		Staphylococcus capitis	0	1	2024-04-24	2024-04-24	0	0	0	0	0	0	0	0	0	0	1	vanc	0	0	1	1	0					0						0	0	1
113	2024-04-25	2024-05-19	24	89	2	3	0	0	0	0	0	0	0		Staphylococcus hominis	0	1	2024-04-25	2024-04-25	0	0	0	0	0	0	0	0	0	0	1	cefepime	0	0	1	1	1	2024-05-07	0	1	12	0						0	0	1
114	2024-04-26	2024-05-17	21	88	2	2	1	0	0	1	0	0	1	mod TR	Staphylococcus epidermidis	0	1	2024-04-26	2024-04-26	0	0	0	0	0	0	0	0	0	0	1	vanc meropenem	0	0	1	0	1	2024-05-07	0	1	11	0						0	0	0
115	2024-04-27	2024-05-01	4	43	2	2	1	0	0	0	0	0	1	MVP s/p repair	Staphylococcus capitis	0	1	2024-04-27	2024-04-27	0	0	0	0	0	0	0	0	0	0	1	vanc	0	0	1	1	1	2024-04-29	0	0	2	0						0	0	1
116	2024-04-30	2024-05-07	7	92	1	2	0	0	0	0	0	0	0		Staphylococcus capitis	0	1	2024-04-30	2024-04-30	0	0	0	0	0	0	0	0	0	0	1	vanc cefepime	0	0	1	1	0					0						0	0	1
117	2024-03-01	2024-03-08	7	82	2	2	0	0	0	0	0	0	0		Staphylococcus capitis	0	1	2024-03-01	2024-03-01	0	0	0	0	0	0	0	0	0	0	1	ceftriaxone	0	0	1	1	0					0						0	0	1
118	2024-03-02	2024-03-09	7	44	2	3	1	0	0	0	1	0	0		Staphylococcus hominis	0	1	2024-03-02	2024-03-02	0	0	0	0	0	0	0	0	0	0	1	vanc	0	1	1	1	0					0						0	0	1
119	2024-03-03	2024-03-14	11	65	1	2	0	0	0	0	0	0	0		Staphylococcus epidermidis	0	1	2024-03-03	2024-03-03	0	0	0	0	0	0	0	0	0	0	1	doxycycline	0	0	1	1	1	2024-03-06	0	0	3	0						0	0	1
120	2024-03-03	2024-03-07	4	77	2	3	0	0	0	0	0	0	0		Staphylococcus capitis	0	1	2024-03-03	2024-03-03	0	0	0	0	0	0	0	0	0	0	1	vanc	0	1	1	1	1	2024-03-06	0	0	3	0						0	0	1
121	2024-03-05	2024-03-12	7	70	1	2	0	0	0	0	0	0	0		Staphylococcus epidermidis	0	1	2024-03-05	2024-03-05	0	0	0	0	0	0	0	0	0	0	1	vanc cefepime	0	0	1	1	1	2024-03-11	0	1	6	0						0	0	1
122	2024-03-06	2024-03-09	3	70	1	3	0	0	0	0	0	0	0		Staphylococcus hominis	0	1	2024-03-06	2024-03-06	0	0	0	0	0	0	0	0	0	0	1	ceftriaxone	0	0	1	1	0					0						0	0	1
123	2024-03-08	2024-03-11	3	75	1	3	1	0	0	0	0	0	1	G1DD	Staphylococcus hominis	0	1	2024-03-08	2024-03-08	0	0	0	0	0	0	0	0	0	0	1	ceftriaxone	0	0	1	1	1	2024-03-10	0	1	2	0						0	0	1
124	2024-03-08	2024-03-11	3	60	2	3	0	0	0	0	0	0	0		Staphylococcus hominis	0	1	2024-03-08	2024-03-08	0	0	0	0	0	0	0	0	0	0	1	ceftriaxone	0	0	1	1	0					0						0	0	1
125	2024-03-10	2024-03-22	12	71	1	2	1	0	0	0	1	0	0		Staphylococcus epidermidis	0	1	2024-03-10	2024-03-10	0	1	0	0	1	0	0	0	0	0	1	linezolid levofloxacin	0	1	1	1	1	2024-03-11	0	0	1	0						0	0	1
126	2024-03-11	2024-03-16	5	80	2	2	1	0	0	0	0	0	1	G1DD	Staphylococcus hominis	0	1	2024-03-11	2024-03-11	0	0	0	0	0	0	0	0	0	0	1	cefuroxime	0	1	1	0	1	2024-03-15	0	0	4	0						0	0	0
127	2024-03-11	2024-03-19	8	61	1	3	0	0	0	0	0	0	0		Staphylococcus hominis	0	1	2024-03-11	2024-03-11	0	0	0	0	0	0	0	0	0	0	1	cefepime	0	1	1	1	1	2024-03-13	0	0	2	0						0	0	1
128	2024-03-14	2024-03-26	12	54	1	2	1	0	0	0	1	0	0		Staphylococcus epidermidis	0	1	2024-03-14	2024-03-14	0	1	0	0	1	0	0	0	0	0	1	daptomycin	0	1	1	1	1	2024-03-19	0	0	5	0						0	0	1
129	2024-03-14	2024-03-27	13	74	1	2	0	0	0	0	0	0	0		Staphylococcus epidermidis	0	1	2024-03-14	2024-03-14	0	0	0	0	0	0	0	0	0	0	1	vanc cefepime	0	0	1	0	0					0						0	0	0
130	2024-03-16	2024-03-19	3	53	1	5	0	0	0	0	0	0	0		Staphylococcus epidermidis	0	1	2024-03-16	2024-03-16	0	0	0	0	0	0	0	0	0	0	1	ceftriaxone	0	0	1	1	0					0						0	0	1
131	2024-03-17	2024-03-25	8	23	2	2	0	0	0	0	0	0	0		Staphylococcus epidermidis	0	1	2024-03-17	2024-03-17	0	0	0	0	0	0	0	0	0	0	1	vanc	0	1	0	1	1	2024-03-22	0	0	5	0						0	0	0
132	2024-03-12	2024-04-19	38	41	1	3	1	0	0	0	1	0	0		Staphylococcus epidermidis	0	1	2024-03-19	2024-03-19	0	1	0	0	1	0	0	0	0	0	1	vanc	1	1	1	1	1	2024-03-21	0	0	2	0						0	0	1
133	2024-03-21	2024-03-26	5	73	2	2	1	0	0	0	1	0	0		Staphylococcus hominis	0	1	2024-03-21	2024-03-21	0	0	0	0	0	0	0	0	0	0	1	vanc cefepime	0	1	1	1	0					0						0	0	1
134	2024-03-27	2024-04-05	9	59	2	2	0	0	0	0	0	0	0		Staphylococcus epidermidis	0	1	2024-03-27	2024-03-27	0	0	0	0	0	0	0	0	0	0	1	ceftriaxone	0	1	1	1	0					0						0	0	1
			mean	13.018	69.0531													1.61947			0.663717
			STD	15.472	16.3477													1.15973			1.34038
[truncated: 4 more columns]

## Sheet: TEE specific data
Subject #	Admission Date	Discharge Date	LOS	Age	Sex	Race	Comorbidity present (at least 1)?	IVDU	Prosthetic Valve	Intracardiac device	Chronic in-line cath	Previous IE	Cardio-structural abnormality	Type of abnormality	Bcx initial	Staph aureus	Viridans	Enterococcus	CoNS	Bcx repeat positive?	Total sets of positive Bcx	Date initial positive Bcx	Date last positive Bcx	Days Bcx positive	Alternative source of infx?	OM?	Cellulitis or open wound?	Line related?	Abscess?	Intra-abdominal?	PNA?	UTI?	Other	Abx used?	Abx tx? (ended w/)	Planned longterm abx tx (~4-6wks) +/- PICC?	fever?	defervesced	not defervesced	remained afebrile	< 3 days defervescence or remained afebrile?	WBC downtrend or remained nrml?	TTE used?	TTE date	TTE new valvular veg?	TTE new worsened fxnl findings from previous TTEs?	Time to TTE	TEE used?	TEE date
1	2024-05-30	2024-06-19	20	85	1	2	1	0	1	1	0	0	1	mod TR, MR, AS w/ TAVR, CABG 2000	Methicillin-Resistant Staphylococcus aureus	1	0	0	0	1	11	2024-05-30	2024-06-12	13	0	0	0	0	0	0	0	0	0	1	Daptomycin	1	0	0	0	1	1	1	1	2024-05-31	0	0	1	1	2024-06-03
3	2024-06-05	2024-06-22	17	62	1	2	1	0	0	0	0	0	1	thickened AV leaf	Staphylococcus aureus	1	0	0	0	1	5	2024-06-05	2024-06-11	6	0	0	0	0	0	0	0	0	1	1	Ertapenem nafcillin	0	1	0	1	0	0	1	1	2024-06-05	0	0	2	1	2024-06-12
4	2024-06-06	2024-06-12	6	77	1	2	0	0	0	0	0	0	0		Staphylococcus aureus	1	0	0	0	1	2	2024-06-06	2024-06-07	1	1	0	0	0	0	0	0	1	1	1	cefazolin	0	1	1	0	0	1	1	1	2024-06-07	0	0	0	1	2024-06-10
15	2024-05-08	2024-05-20	12	77	1	2	1	0	0	0	0	0	1	at least mod TR'	Staphylococcus aureus	1	0	0	0	0	1	2024-05-08	2024-05-08	0	1	0	0	0	1	0	0	1	0	1	cefazolin	1	1	1	0	0	1	1	1	2024-05-09	0	0	1	1	2024-05-13
18	2024-04-03	2024-04-13	10	51	1	3	0	0	0	0	0	0	0		Staphylococcus aureus	1	0	0	0	1	3	2024-04-03	2024-04-06	3	1	1	0	0	0	0	0	0	0	1	cefazolin	1	1	1	0	0	1	1	1	2024-04-05	0	0	1	1	2024-04-09
22	2024-04-19	2024-04-26	7	79	1	2	1	0	0	1	0	0	1	G2DD	Staphylococcus aureus	1	0	0	0	1	1	2024-04-19	2024-04-19	0	0	0	0	0	0	0	0	0	1	1	cefazolin	1	1	1	0	0	1	0	1	2024-04-24	0	0	1	1	2024-04-26
23	2024-04-19	2024-06-04	46	46	2	2	1	1	0	0	1	0	0		Methicillin-Resistant Staphylococcus aureus	1	0	0	0	1	3	2024-04-19	2024-04-22	3	1	0	0	1	0	0	0	0	0	1	vanc	1	0	0	0	1	1	1	1	2024-04-24	0	0	2	1	2024-04-26
24	2024-04-20	2024-04-30	10	87	2	2	1	0	0	0	0	0	1	mod MS, G1DD	Staphylococcus aureus	1	0	0	0	1	2	2024-04-20	2024-04-21	1	0	0	0	0	0	0	0	0	0	1	cefazolin	1	1	1	0	0	1	1	1	2024-04-24	0	0	1	1	2024-04-29
30	2024-02-29	2024-03-28	28	28	2	2	1	1	0	0	0	0	0		Methicillin-Resistant Staphylococcus aureus	1	0	0	0	1	3	2024-02-29	2024-03-02	2	1	0	0	0	0	0	1	0	0	1	vanc	1	1	0	1	0	0	1	1	2024-03-01	0	1	4	1	2024-03-14
32	2024-03-04	2024-03-27	23	79	2	2	1	0	0	0	0	0	1	G3DD, mod RV dilation	Methicillin-Resistant Staphylococcus aureus	1	0	0	0	1	5	2024-03-04	2024-03-08	4	0	0	0	0	0	0	0	0	0	1	Daptomycin	1	1	1	0	0	1	1	1	2024-03-06	0	0	0	1	2024-03-13
33	2024-03-05	2024-04-01	27	77	2	3	1	0	0	1	0	0	1	sev biatrial enlarge, mod TR	Staphylococcus aureus	1	0	0	0	1	3	2024-03-13	2024-03-15	2	0	0	0	0	0	0	0	0	0	1	cefazolin	1	0	0	0	1	1	1	1	2024-03-14	0	0	1	1	2024-03-15
35	2024-04-08	2024-05-13	35	42	2	4	1	1	0	0	0	0	0		Methicillin-Resistant Staphylococcus aureus	1	0	0	0	1	5	2024-04-11	2024-04-16	5	1	1	1	0	0	0	0	0	0	1	Daptomycin	1	1	0	1	0	0	1	1	2024-04-15	0	0	6	1	2024-04-15
38	2024-03-30	2024-04-30	31	69	2	3	0	0	0	0	0	0	0		Methicillin Resistant Staphylococcus aureus	1	0	0	0	0	1	2024-03-30	2024-03-30	0	0	0	0	0	0	0	0	0	0	1	Daptomycin	1	1	1	0	0	1	1	1	2024-04-01	0	1	4	1	2024-04-03
41	2024-06-07	2024-06-13	6	71	1	2	1	0	1	0	0	0	0		Streptococcus gordonii	0	1	0	0	0	1	2024-06-07	2024-06-07	0	0	0	0	0	0	0	0	0	0	1	ceftriaxone	1	1	1	0	0	1	1	1	2024-06-10	0	0	1	1	2024-06-12
45	2024-05-09	2024-05-14	5	58	1	3	0	0	0	0	0	0	1	sev MR	Streptococcus mutans	0	1	0	0	0	1	2024-05-09	2024-05-09	0	1	0	0	0	0	0	0	0	1	1	ceftriaxone gentamycin	0	1	1	0	0	1	1	1	2024-05-10	0	0	1	1	2024-05-13
46	2024-05-16	2024-06-05	20	77	1	2	0	0	0	0	0	0	0		Streptococcus mitis group	0	1	0	0	0	1	2024-05-17	2024-05-17	0	1	0	0	0	0	0	0	0	1	1	vanc	1	1	0	1	0	0	0	1	2024-05-21	0	0	3	1	2024-05-22
52	2024-03-05	2024-03-15	10	42	1	2	1	0	0	0	0	0	1	bicuspid AV and AS	Streptococcus gordonii	0	1	0	0	1	2	2024-03-05	2024-03-06	1	0	0	0	0	0	0	0	0	0	1	ceftriaxone	1	1	1	0	0	1	1	1	2024-03-06	1	1	2	1	2024-03-08
65	2024-03-24	2024-04-06	13	54	2	2	0	0	0	0	0	0	0		Enterococcus faecalis	0	0	1	0	1	6	2024-03-24	2024-03-29	5	1	0	0	0	0	0	0	1	0	1	linezolid	0	1	0	1	0	0	1	1	2024-03-29	0	0	2	1	2024-04-01
76	2024-06-14	2024-06-25	11	59	1	3	0	0	0	0	0	0	0		Staphylococcus epidermidis	0	0	0	1	1	3	2024-06-14	2024-06-17	3	1	1	1	0	0	0	0	0	0	1	cefazolin	1	1	1	0	0	1	1	1	2024-06-18	0	0	1	1	2024-06-20
77	2024-06-17	2024-07-02	15	69	2	2	1	0	0	1	0	0	0		Staphylococcus hominis	0	0	0	1	0	1	2024-06-17	2024-06-17	0	0	0	0	0	0	0	0	0	0	1	cefazolin gentamycin rifampin	0	1	1	0	0	1	1	0					1	2024-06-19
108	2024-04-16	2024-04-30	14	78	2	2	1	0	1	0	0	0	1	G2DD, s/p TAVR	Staphylococcus epidermidis	0	0	0	1	1	4	2024-04-16	2024-04-22	6	0	0	0	0	0	0	0	0	0	1	vanc	1	1	1	0	0	1	1	1	2024-04-17	0	1	4	1	2024-04-22
			mean	17.4286	65.0952			14	3	3	4	1	0	10	0	0	13	4	1	3	15	3.04762			2.61905																							1.9
			STD	10.8516	16.2601																	2.41819			3.1698																							1.55259
																													No comorbid, Alt source infxn, Abx used, Defervesced, WBC resolve/nrml VS Abx change					Defervesced, WBC resolve/nrml VS Abx change					Fever VS Abx change					Defervesced VS Abx change					WBC resolve/nrml VS Abx change
	pvalue	Age all	Age TEE	0.389885	LOS all	LOS TEE	0.178616	Tot set bcx all	Tot set bcx TEE	0.037133	Age w/o TEE	Age w/ TEE	0.314843	LOS w/o TEE	LOS w/ TEE	0.121883	Tot set bcx w/o TEE	Tot set bcx w/ TEE	0.0147026	Days bcx pos w/o TEE	Days bcx positive w/ TEE	0.0110883							Count of Subject #	Abx/tx changed based off TEE?				Count of Subject #	Abx/tx changed based off TEE?				Count of Subject #	Abx/tx changed based off TEE?				Count of Subject #	Abx/tx changed based off TEE?				Count of Subject #
	df	85	85	153	20	20	151	11	11	153	78	85			20		6	11	132	4	13	132							No comorbid, Alt source infxn, Abx used, Defervesced, WBC resolve/nrml	0	1	Grand Total		Defervesced, WBC resolve/nrml	0	1	Grand Total		fever?	0	1	Grand Total		< 3 days defervescence or remained afebrile?	0	1	Grand Total		WBC downtrend or remained nrml?
	t value	78	62			17		6	5	2.10266	71	62		3	17		2	5	2.47215	1	6	2.57623							0	13	4	17		0	5	1	6		0	3		3		0	4	1	5		0
	SE	62	77		17	6		5	2		81	77		11	6		4	2	0.536917	4	1	0.700996							1	3	1	4		1	11	4	15		1	13	5	18		1	12	4	16		1
	MOE	77	77		6	12		2	1		45	77		32	12		1	1	0.0924483	0	0	0.1207							Grand Total	16	5	21		Grand Total	16	5	21		Grand Total	16	5	21		Grand Total	16	5	21		Grand Total
	mean diff	71	51		3	10		2	3		60	51		10	10		2	3	1.43	1	3	1.95
	CI upper	81	79		11	7		4	1		64	79		12	7		2	1	1.52245	1	0	2.0707
	CI lower	45	46		32	46		1	3		46	46		7	46		5	3	1.33755	5	3	1.8293								0	1				0	1				0	1				0	1
		60	87		10	10		2	2		74	87		31	10		1	2		0	1								0	12.9524	4.04762			0	4.57143	1.42857			0	2.28571	0.714286			0	3.80952	1.19048			0
		64	28		12	28		2	3		70	28		10	28		2	3		2	2								1	3.04762	0.952381			1	11.4286	3.57143			1	13.7143	4.28571			1	12.1905	3.80952			1
		46	79		7	23		5	5		91	79		22	23		2	5		1	4
		74	77		31	27		1	3		71	77		14	27		3	3		3	2								0.950458					0.626928					0.53789					0.818769					0.643186
		70	42		10	35		2	5		83	42		15	35		3	5		2	5
		91	69		22	31		2	1		59	69		20	31		2	1		1	0
		71	71		14	6		3	1		65	71		5	6		3	1		1	0								No comorbid, Alt source infxn, Abx used, Defervesced, WBC resolve/nrml VS TEE valv veg					Defervesced, WBC resolve/nrml VS TEE valv veg					Fever VS TEE valv veg					Defervesced VS TEE valv veg					WBC resolve/nrml VS TEE valv veg
		77	58		12	5		1	1		85	58		9	5		2	1		0	0								Count of Subject #	TEE new valvular veg?				Count of Subject #	TEE new valvular veg?				Count of Subject #	TEE new valvular veg?				Count of Subject #	TEE new valvular veg?				Count of Subject #
		83	77		15	20		3	1		85	77		8	20		3	1		2	0								No comorbid, Alt source infxn, Abx used, Defervesced, WBC resolve/nrml	0	1	Grand Total		Defervesced, WBC resolve/nrml	0	1	Grand Total		fever?	0	1	Grand Total		< 3 days defervescence or remained afebrile?	0	1	Grand Total		WBC downtrend or remained nrml?
		59	42		20	10		2	2		66	42		18	10		4	2		3	1								0	14	3	17		0	6		6		0	2	1	3		0	5		5		0
		51	54		10	13		3	6		59	54		18	13		3	6		3	5								1	3	1	4		1	11	4	15		1	15	3	18		1	12	4	16		1
		65	59		5	11		3	3		72	59		9	11		2	3		2	3								Grand Total	17	4	21		Grand Total	17	4	21		Grand Total	17	4	21		Grand Total	17	4	21		Grand Total
		85	69		9	15		2	1		71	69		16	15		2	1		1	0
		85	78		8	14		3	4		54	78		107	14		4	4		3	6
		79			7			1			82			25			2			1										0	1				0	1				0	1				0	1
		46			46			3			95			13			5			4									0	13.7619	3.2381			0	4.85714	1.14286			0	2.42857	0.571429			0	4.04762	0.952381			0
		87			10			2			64			2			3			1									1	3.2381	0.761905			1	12.1429	2.85714			1	14.5714	3.42857			1	12.9524	3.04762			1
		66			18			4			87			11			4			3
		59			18			3			70			12			1			0									0.736152					0.36123					0.496116					0.441748					0.709106
		72			9			2			78			4			1			0
		71			16			2			83			7			1			0
		54			107			4			65			5			1			0									No comorbid, Alt source infxn, Abx used, Defervesced, WBC resolve/nrml VS TEE new fxnl					Defervesced, WBC resolve/nrml VS TEE new fxnl					Fever VS TEE new fxnl					Defervesced VS TEE new fxnl					WBC resolve/nrml VS TEE new fxnl
		28			28			3			55			10			1			0									Count of Subject #	TEE new anatomical/fxnl findings?				Count of Subject #	TEE new anatomical/fxnl findings?				Count of Subject #	TEE new anatomical/fxnl findings?				Count of Subject #	TEE new valvular veg?				Count of Subject #
		82			25			2			75			14			1			0									No comorbid, Alt source infxn, Abx used, Defervesced, WBC resolve/nrml	0	1	Grand Total		Defervesced, WBC resolve/nrml	0	1	Grand Total		fever?	0	1	Grand Total		< 3 days defervescence or remained afebrile?	0	1	Grand Total		WBC downtrend or remained nrml?
		79			23			5			54			7			1			0									0	12	5	17		0	4	2	6		0	3		3		0	5		5		0
		77			27			3			78			25			1			0									1	4		4		1	12	3	15		1	13	5	18		1	12	4	16		1
		95			13			5			36			26			1			0									Grand Total	16	5	21		Grand Total	16	5	21		Grand Total	16	5	21		Grand Total	17	4	21		Grand Total
		42			35			5			95			5			1			0
		64			2			3			37			28			1			0
		87			11			4			86			7			1			0										0	1				0	1				0	1				0	1
		69			31			1			74			8			1			0									0	12.9524	4.04762			0	4.57143	1.42857			0	2.28571	0.714286			0	4.04762	0.952381			0
		70			12			1			87			9			2			1									1	3.04762	0.952381			1	11.4286	3.57143			1	13.7143	4.28571			1	12.9524	3.04762			1
		78			4			1			55						4			3
		71			6			1			86			15			1			0									0.441748					0.516937					0.53789					0.441748					0.709106
		83			7			1			77			7			4			7
		65			5			1			81			19			2			1
		55			10			1			87			6			3			2
		58			5			1			47			5			4			5
		77			20			1			54			44			5			3
		75			14			1			82			10			1			0
		54			7			1			71			10			1			0
		78			25			1			54			44			5			3
		36			26			1			69			5			1			0
		95			5			1			53			10			1			0
		42			10			2			73			28			1			0
		37			28			1			69			8			1			0
		86			7			1			63			4			1			0
		74			8			1			76			10			1			0
		87			9			2			80			9			1			0
		55						4			81			8			1			0
		86			15			1			77			3			1			0
		77			7			4			58			6			1			0
		81			19			2			68			14			1			0
		87			6			3			84			7			1			0
		47			5			4			72			21			1			0
		54			44			5			72			3			1			0
		82			10			1			42			4			1			0
		54			13			6			57			17			1			0
		71			10			1			57			22			1			0
		54			44			5			74			4			1			0
		69			5			1			90			4			1			0
		53			10			1			83			3			1			0
		73			28			1			62			11			1			0
		69			8			1			94			5			1			0
		63			4			1			79			3			1			0
		76			10			1			45			9			1			0
		80			9			1			75			7			1			0
		81			8			1			90			5			2			0
		59			11			3			88			9			1			0
		69			15			1			96			4			1			0
		77			3			1			75			6			1			0
		58			6			1			72			14			1			0
		68			14			1			39			1			1			0
		84			7			1			90			8			1			0
		72			21			1			92			4			1			0
		72			3			1			51			98			1			0
		42			4			1			32			2			1			0
		57			17			1			81			6			1			0
		57			22			1			66			16			2			1
		74			4			1			79			3			1			0
		90			4			1			38			55			1			0
		83			3			1			86			6			1			0
		62			11			1			58			8			1			0
		94			5			1			28			6			1			0
		79			3			1			89			24			1			0
		45			9			1			88			21			1			0
		75			7			1			43			4			1			0
		90			5			2			92			7			1			0
		88			9			1			82			7			1			0
		96			4			1			44			7			1			0
		75			6			1			65			11			1			0
		72			14			1			77			4			1			0
		39			1			1			70			7			1			0
		90			8			1			70			3			1			0
		92			4			1			75			3			1			0
		51			98			1			60			3			1			0
		32			2			1			71			12			1			0
		81			6			1			80			5			1			0
		66			16			2			61			8			1			0
		79			3			1			54			12			1			0
		78			14			4			74			13			1			0
		38			55			1			53			3			1			0
		86			6			1			23			8			1			0
		58			8			1			41			38			1			0
		28			6			1			73			5			1			0
		89			24			1			59			9			1			0
		88			21			1
		43			4			1
		92			7			1
		82			7			1
		44			7			1
		65			11			1
		77			4			1
		70			7			1
		70			3			1
		75			3			1
		60			3			1
		71			12			1
		80			5			1
		61			8			1
		54			12			1
		74			13			1
		53			3			1
		23			8			1
		41			38			1
		73			5			1
		59			9			1
								134
[truncated: 22 more columns]

## Sheet: Predeterm Abx specific data
Subject #	Admission Date	Discharge Date	LOS	Age	Sex	Race	Comorbidity present (at least 1)?	IVDU	Prosthetic Valve	Intracardiac device	Chronic in-line cath	Previous IE	Cardio-structural abnormality	Type of abnormality	Bcx initial	Staph aureus	Viridans	Enterococcus	CoNS	Bcx repeat positive?	Total sets of positive Bcx	Date initial positive Bcx	Date last positive Bcx	Days bcx positive	Alternative source of infx?	OM?	Cellulitis or open wound?	Line related?	Abscess?	Intra-abdominal?	PNA?	UTI?	Other	Abx used?	Abx tx? (ended w/)	Planned longterm abx tx (~4-6wks) +/- PICC?	fever?	< 3 days defervescence or remained afebrile?	defervesced	not defervesced	remained afebrile	WBC downtrend or remained nrml?	TTE used?	TTE date	TTE new valvular veg?	TTE new worsened fxnl findings from previous TTEs?	Time to TTE	TEE used?	TEE date
1	2024-05-30	2024-06-19	20	85	1	2	1	0	1	1	0	0	1	mod TR, MR, AS w/ TAVR, CABG 2000	Methicillin-Resistant Staphylococcus aureus	1	0	0	0	1	11	2024-05-30	2024-06-12	13	0	0	0	0	0	0	0	0	0	1	Daptomycin	1	0	1	0	0	1	1	1	2024-05-31	0	0	1	1	2024-06-03
2	2024-06-03			78	1	3	0	0	0	0	0	0	0		Methicillin-Resistant Staphylococcus aureus	1	0	0	0	1	6	2024-06-03	2024-06-07	4	1	1	0	0	0	0	0	0	0	1	Daptomycin	1	1	1	1	0	0	1	1	2024-06-05	0	0	2	0
5	2024-06-10	2024-06-13	3	71	1	2	1	0	0	0	1	1	1	G3DD, sev LA dilation	Staphylococcus aureus	1	0	0	0	1	2	2024-06-10	2024-06-11	1	1	0	0	0	1	0	0	0	0	1	vanc zosyn	1	1	1	1	0	0	0	1	2024-06-11	1	1	1	0
7	2024-06-10	2024-07-12	32	45	2	2	0	0	0	0	0	0	0		Staphylococcus aureus	1	0	0	0	0	1	2024-06-12	2024-06-12	0	0	0	0	0	0	0	0	0	0	1	cefazolin	1	0	1	0	0	1	1	1	2024-06-14	0	0	4	0
8	2024-06-13	2024-06-23	10	60	1	3	1	0	0	0	0	0	1	G2DD	Staphylococcus aureus	1	0	0	0	1	2	2024-06-13	2024-06-14	1	1	0	0	0	1	0	0	0	0	1	cefazolin	1	1	1	1	0	0	1	1	2024-06-14	0	0	1	0
9	2024-06-15	2024-06-27	12	64	2	2	1	0	0	0	1	0	0		Staphylococcus aureus	1	0	0	0	1	2	2024-06-20	2024-06-21	1	1	0	1	0	0	0	0	0	0	1	cefazolin	1	1	1	1	0	0	1	1	2024-06-24	0	0	9	0
10	2024-06-25	2024-07-02	7	46	1	2	1	1	0	0	1	1	1	1/4/24 veg seen, sev TR,	Methicillin-Resistant Staphylococcus aureus	1	0	0	0	1	5	2024-06-25	2024-06-30	5	1	1	1	0	1	0	0	0	0	1	Daptomycin	1	1	1	1	0	0	1	1	2024-06-25	1	1	0	0
12	2024-05-01	2024-05-11	10	70	1	5	1	0	0	0	1	0	1	G1DD	Staphylococcus aureus	1	0	0	0	1	2	2024-05-01	2024-05-03	2	1	0	0	1	0	0	0	0	0	1	cefazolin	1	1	1	1	0	0	1	1	2024-05-07	0	1	6	0
13	2024-05-02	2024-05-24	22	91	2	2	1	0	0	0	0	0	1	HFrEF	Staphylococcus aureus	1	0	0	0	1	2	2024-05-02	2024-05-03	1	1	0	0	0	1	0	0	0	0	1	cefazolin	1	1	1	1	0	0	1	1	2024-05-06	0	0	4	0
14	2024-05-07	2024-05-21	14	71	2	2	1	0	0	0	1	0	0		Staphylococcus aureus	1	0	0	0	1	3	2024-05-07	2024-05-10	3	1	0	1	1	0	0	0	0	0	1	cefazolin	1	1	0	0	1	0	1	1	2024-05-08	0	0	1	0
15	2024-05-08	2024-05-20	12	77	1	2	1	0	0	0	0	0	1	at least mod TR'	Staphylococcus aureus	1	0	0	0	0	1	2024-05-08	2024-05-08	0	1	0	0	0	1	0	0	1	0	1	cefazolin	1	1	1	1	0	0	1	1	2024-05-09	0	0	1	1	2024-05-13
16	2024-05-08	2024-05-23	15	83	2	2	1	0	0	0	0	0	1	PFO, sev biatrial enlarge, G1DD, mod LVH	Staphylococcus aureus	1	0	0	0	1	3	2024-05-17	2024-05-19	2	0	0	0	0	0	0	0	0	0	1	nafcillin	1	1	1	1	0	0	1	1	2024-05-20	0	0	12	0
17	2024-05-26	2024-06-15	20	59	1	3	1	0	0	0	0	0	1	G1DD, mod mitral annular calc	Staphylococcus aureus	1	0	0	0	1	2	2024-05-28	2024-05-29	1	1	0	1	0	0	0	0	0	0	1	cefazolin	1	1	1	1	0	0	1	1	2024-05-30	1	0	4	0
18	2024-04-03	2024-04-13	10	51	1	3	0	0	0	0	0	0	0		Staphylococcus aureus	1	0	0	0	1	3	2024-04-03	2024-04-06	3	1	1	0	0	0	0	0	0	0	1	cefazolin	1	1	1	1	0	0	1	1	2024-04-05	0	0	2	1	2024-04-09
19	2024-04-11	2024-04-16	5	65	2	2	1	0	0	0	0	0	1	thickened AV leaf	Methicillin-Resistant Staphylococcus aureus	1	0	0	0	1	3	2024-04-11	2024-04-12	1	0	0	0	0	0	0	0	0	1	1	Daptomycin	1	0	1	0	0	1	1	1	2024-04-12	0	1	1	0
20	2024-04-10	2024-04-19	9	85	1	2	0	0	0	0	0	0	0		Staphylococcus aureus	1	0	0	0	1	2	2024-04-14	2024-04-14	0	0	0	0	0	0	0	0	0	0	1	cefazolin	1	1	1	1	0	0	1	1	2024-04-18	0	0	8	0
21	2024-04-18	2024-04-26	8	85	2	2	1	0	0	0	0	0	1	G1DD	Staphylococcus aureus	1	0	0	0	1	3	2024-04-18	2024-04-20	2	1	0	0	0	1	0	0	0	0	1	cefazolin	1	1	0	0	1	0	1	1	2024-04-22	0	1	4	0
22	2024-04-19	2024-04-26	7	79	1	2	1	0	0	1	0	0	1	G2DD	Staphylococcus aureus	1	0	0	0	1	1	2024-04-19	2024-04-19	0	0	0	0	0	0	0	0	0	1	1	cefazolin	1	1	1	1	0	0	0	1	2024-04-24	0	0	5	1	2024-04-26
23	2024-04-19	2024-06-04	46	46	2	2	1	1	0	0	1	0	0		Methicillin-Resistant Staphylococcus aureus	1	0	0	0	1	3	2024-04-19	2024-04-22	3	1	0	0	1	0	0	0	0	0	1	vanc	1	0	1	0	0	1	1	1	2024-04-24	0	0	5	1	2024-04-26
24	2024-04-20	2024-04-30	10	87	2	2	1	0	0	0	0	0	1	mod MS, G1DD	Staphylococcus aureus	1	0	0	0	1	2	2024-04-20	2024-04-21	1	0	0	0	0	0	0	0	0	0	1	cefazolin	1	1	1	1	0	0	1	1	2024-04-24	0	0	4	1	2024-04-29
25	2024-04-23	2024-05-11	18	66	1	2	1	0	0	0	0	0	1	G2DD	Staphylococcus aureus	1	0	0	0	1	4	2024-04-23	2024-04-26	3	1	1	0	0	1	0	0	0	0	1	cefazolin	1	0	1	0	0	1	0	1	2024-04-29	0	0	6	0
26	2024-04-24	2024-05-12	18	59	2	2	1	0	0	0	1	0	1	G1DD	Staphylococcus aureus	1	0	0	0	1	3	2024-04-24	2024-04-27	3	1	0	0	1	0	0	0	0	0	1	cefazolin	1	1	1	1	0	0	1	1	2024-05-03	1	0	9	0
27	2024-04-21	2024-04-30	9	72	1	2	1	0	0	0	0	0	1	anterolat hypokinesis, apical kinesis, HFmrEF	Staphylococcus aureus	1	0	0	0	1	2	2024-04-25	2024-04-27	2	1	1	0	0	0	0	0	0	1	1	cefazolin	1	1	1	1	0	0	1	1	2024-04-26	0	0	5	0
28	2024-04-24	2024-05-10	16	71	2	2	1	0	0	0	0	0	1	mod TR, G1DD	Staphylococcus aureus	1	0	0	0	1	2	2024-04-27	2024-04-28	1	1	1	0	0	1	0	0	0	1	1	nafcillin	1	1	1	1	0	0	1	1	2024-05-02	0	0	8	0
29	2024-02-25	2024-06-11	107	54	1	3	0	0	0	0	0	0	0		Methicillin-Resistant Staphylococcus aureus	1	0	0	0	1	4	2024-04-25	2024-04-28	3	1	0	1	0	0	0	0	0	0	1	vanc	1	1	0	0	1	0	1	1	2024-04-29	0	0	64	0
30	2024-02-29	2024-03-28	28	28	2	2	1	1	0	0	0	0	0		Methicillin-Resistant Staphylococcus aureus	1	0	0	0	1	3	2024-02-29	2024-03-02	2	1	0	0	0	0	0	1	0	0	1	vanc	1	1	0	0	1	0	1	1	2024-03-01	0	1	1	1	2024-03-14
31	2024-02-21	2024-03-17	25	82	1	2	1	0	0	0	1	0	1	sev AS	Staphylococcus aureus	1	0	0	0	1	2	2024-02-29	2024-03-01	1	1	0	0	1	0	0	0	1	0	1	vanc	1	0	1	0	0	1	0	1	2024-03-01	0	1	9	0
32	2024-03-04	2024-03-27	23	79	2	2	1	0	0	0	0	0	1	G3DD, mod RV dilation	Methicillin-Resistant Staphylococcus aureus	1	0	0	0	1	5	2024-03-04	2024-03-08	4	0	0	0	0	0	0	0	0	0	1	Daptomycin	1	1	1	1	0	0	1	1	2024-03-06	0	0	2	1	2024-03-13
33	2024-03-05	2024-04-01	27	77	2	3	1	0	0	1	0	0	1	sev biatrial enlarge, mod TR	Staphylococcus aureus	1	0	0	0	1	3	2024-03-13	2024-03-15	2	0	0	0	0	0	0	0	0	0	1	cefazolin	1	0	1	0	0	1	1	1	2024-03-14	0	0	9	1	2024-03-15
34	2024-03-13	2024-03-26	13	95	2	4	0	0	0	0	0	0	0		Staphylococcus aureus	1	0	0	0	1	5	2024-03-13	2024-03-17	4	1	0	0	0	0	0	0	0	1	1	cefazolin	1	1	1	1	0	0	1	1	2024-03-15	0	0	2	0
35	2024-04-08	2024-05-13	35	42	2	4	1	1	0	0	0	0	0		Methicillin-Resistant Staphylococcus aureus	1	0	0	0	1	5	2024-04-11	2024-04-16	5	1	1	1	0	0	0	0	0	0	1	Daptomycin	1	1	0	0	1	0	1	1	2024-04-15	0	0	7	1	2024-04-15
36	2024-03-27	2024-03-29	2	64	2	2	1	0	0	0	0	0	1	G2DD	Staphylococcus aureus	1	0	0	0	1	3	2024-03-27	2024-03-28	1	0	0	0	0	0	0	0	0	0	1	cefazolin	1	1	1	1	0	0	0	1	2024-03-28	1	1	1	0
37	2024-03-28	2024-04-08	11	87	2	2	1	0	0	1	0	0	0	HFrEF	Staphylococcus aureus	1	0	0	0	1	4	2024-03-28	2024-03-31	3	0	0	0	0	0	0	0	0	0	1	nafcillin	1	1	0	0	1	0	0	1	2024-04-01	0	0	4	0
38	2024-03-30	2024-04-30	31	69	2	3	0	0	0	0	0	0	0		Methicillin-Resistant Staphylococcus aureus	1	0	0	0	0	1	2024-03-30	2024-03-30	0	0	0	0	0	0	0	0	0	0	1	Daptomycin	1	1	1	1	0	0	1	1	2024-04-01	0	1	2	1	2024-04-03
39	2024-05-31	2024-06-12	12	70	2	2	0	0	0	0	0	0	0		Streptococcus mutans	0	1	0	0	0	1	2024-06-01	2024-06-01	0	1	1	0	0	0	0	0	0	0	1	ceftriaxone	1	1	1	1	0	0	1	1	2024-06-05	0	1	5	0
41	2024-06-07	2024-06-13	6	71	1	2	1	0	1	0	0	0	0		Streptococcus gordonii	0	1	0	0	0	1	2024-06-07	2024-06-07	0	0	0	0	0	0	0	0	0	0	1	ceftriaxone	1	1	1	1	0	0	1	1	2024-06-10	0	0	3	1	2024-06-12
42	2024-06-12	2024-06-19	7	83	1	5	0	0	0	0	0	0	0		Streptococcus mitis group	0	1	0	0	0	1	2024-06-12	2024-06-12	0	1	0	0	0	1	0	0	0	0	1	ceftriaxone	1	1	1	1	0	0	1	1	2024-06-14	1	0	2	0
46	2024-05-16	2024-06-05	20	77	1	2	0	0	0	0	0	0	0		Streptococcus mitis group	0	1	0	0	0	1	2024-05-17	2024-05-17	0	1	0	0	0	0	0	0	0	1	1	vanc	1	1	0	0	1	0	0	1	2024-05-21	0	0	5	1	2024-05-22
49	2024-04-13	2024-05-08	25	78	2	2	0	0	0	0	0	0	0		Streptococcus anginosus	0	1	0	0	0	1	2024-04-13	2024-04-13	0	1	0	0	0	0	0	0	0	1	1	meropenem	1	1	0	0	1	0	0	1	2024-04-20	0	0	7	0
50	2024-04-27	2024-05-23	26	36	1	3	0	0	0	0	0	0	0		Streptococcus constellatus	0	1	0	0	0	1	2024-04-27	2024-04-27	0	1	0	0	0	1	1	0	0	0	1	ceftriaxone	1	1	1	1	0	0	0	1	2024-05-01	0	0	4	0
52	2024-03-05	2024-03-15	10	42	1	2	1	0	0	0	0	0	1	bicuspid AV and AS	Streptococcus gordonii	0	1	0	0	1	2	2024-03-05	2024-03-06	1	0	0	0	0	0	0	0	0	0	1	ceftriaxone	1	1	1	1	0	0	1	1	2024-03-06	1	1	1	1	2024-03-08
53	2024-03-06	2024-04-03	28	37	2	2	0	0	0	0	0	0	0		Streptococcus anginosus	0	1	0	0	0	1	2024-03-06	2024-03-06	0	1	0	1	0	1	0	0	0	0	1	cefazolin levofloxacin	1	1	1	1	0	0	1	1	2024-03-08	0	0	2	0
55	2024-03-18	2024-03-26	8	74	2	2	0	0	0	0	0	0	1	G1DD	Streptococcus mitis group	0	1	0	0	0	1	2024-03-18	2024-03-18	0	1	0	0	0	1	0	0	0	1	1	ceftriaxone	1	0	1	0	0	1	1	0					0
57	2024-06-16			55	2	2	1	0	0	1	0	0	1	HCM	Enterococcus faecalis	0	0	1	0	1	4	2024-06-26	2024-06-29	3	0	0	0	0	0	0	0	0	0	1	ceftriaxone ampicillin	1	1	1	1	0	0	1	1	2024-07-12	0	1	26	0
59	2024-05-09	2024-05-16	7	77	2	5	0	0	0	0	1	0	1	G1DD	Vancomycin resistant Enterococcus faecalis	0	0	1	0	1	4	2024-05-09	2024-05-16	7	1	0	0	1	0	1	0	0	0	1	Daptomycin	1	0	1	0	0	1	0	1	2024-05-13	0	0	4	0
60	2024-05-13	2024-06-01	19	81	1	2	1	0	0	1	0	0	1	HFrEF	Enterococcus faecalis	0	0	1	0	1	2	2024-05-13	2024-05-14	1	1	0	0	0	0	1	0	0	0	1	ceftriaxone ampicillin	1	1	1	1	0	0	1	1	2024-05-17	0	1	4	0
61	2024-03-30	2024-04-05	6	87	2	3	1	0	0	1	0	0	1	G1DD, mod TR	Enterococcus faecalis	0	0	1	0	1	3	2024-03-31	2024-04-02	2	0	0	0	0	0	0	0	0	0	1	piperacillin tazo	1	0	1	0	0	1	1	1	2024-04-01	0	1	2	0
62	2024-04-16	2024-04-21	5	47	1	2	1	1	0	0	0	0	1	sev TR	Enterococcus faecalis	0	0	1	0	1	4	2024-04-16	2024-04-21	5	1	0	1	0	0	0	0	0	0	1	ceftriaxone ampicillin	1	1	1	1	0	0	1	1	2024-04-18	1	0	2	0
63	2024-04-16	2024-05-30	44	54	1	2	1	0	0	0	1	0	0		Enterococcus faecalis	0	0	1	0	1	5	2024-04-16	2024-04-19	3	1	0	0	1	0	0	0	0	0	1	ceftriaxone ampicillin	1	1	1	1	0	0	1	1	2024-04-19	0	0	3	0
66	2024-05-21	2024-05-31	10	71	2	2	1	0	0	0	1	0	1	mod TR, G1DD	Vancomycin resistant Enterococcus faecalis	0	0	1	0	0	1	2024-05-21	2024-05-21	0	1	0	0	1	0	0	0	0	0	1	Daptomycin	1	0	1	0	0	1	1	1	2024-05-24	0	0	3	0
67	2024-04-16	2024-05-30	44	54	1	2	1	0	0	0	1	0	0		Enterococcus faecalis	0	0	1	0	1	5	2024-04-16	2024-04-19	3	1	0	0	1	0	1	0	0	0	1	ceftriaxone ampicillin	1	1	1	1	0	0	1	1	2024-04-19	0	0	3	0
76	2024-06-14	2024-06-25	11	59	1	3	0	0	0	0	0	0	0		Staphylococcus epidermidis	0	0	0	1	1	3	2024-06-14	2024-06-17	3	1	1	1	0	0	0	0	0	0	1	cefazolin	1	1	1	1	0	0	1	1	2024-06-18	0	0	4	1	2024-06-20
85	2024-05-07	2024-05-24	17	57	1	2	0	0	0	0	0	0	0		Staphylococcus capitis	0	0	0	1	0	1	2024-05-07	2024-05-07	0	0	0	0	0	0	0	0	0	0	1	ertapenenm	1	1	0	0	1	0	0	1	2024-05-20	0	0	13	0
108	2024-04-16	2024-04-30	14	78	2	2	1	0	1	0	0	0	1	G2DD, s/p TAVR	Staphylococcus epidermidis	0	0	0	1	1	4	2024-04-16	2024-04-22	6	0	0	0	0	0	0	0	0	0	1	vanc	1	1	1	1	0	0	1	1	2024-04-17	0	1	1	1	2024-04-22
132	2024-03-12	2024-04-19	38	41	1	3	1	0	0	0	1	0	0		Staphylococcus epidermidis	0	0	0	1	0	1	2024-03-19	2024-03-19	0	1	0	0	1	0	0	0	0	0	1	vanc	1	1	1	1	0	0	1	1	2024-03-21	0	0	9	0
									Count of Subject #	TEE used?
									Abx/tx changed based off TEE?	0	1	Grand Total
									0	39	14	53
									1		2	2
									Grand Total	39	16	55
										0	1
									0	37.5818	15.4182
									1	1.41818	0.581818
									0.0563805
									5.05896
									1
										Expected	Actual
									NO abx change WITHOUT TEE use	37.5818	39
									NO abx change WITH TEE use	15.4182	14
									abx change WITHOUT TEE use	1.41818	0
									abx change WITH TEE use	0.581818	2
[truncated: 9 more columns]

## Sheet: PAB and clinc improve
Subject #	Admission Date	Discharge Date	LOS	Age	Sex	Race	Comorbidity present (at least 1)?	IVDU	Prosthetic Valve	Intracardiac device	Chronic in-line cath	Previous IE	Cardio-structural abnormality	Type of abnormality	Bcx initial	Staph aureus	Viridans	Enterococcus	CoNS	Bcx repeat positive?	Total sets of positive Bcx	Date initial positive Bcx	Date last positive Bcx	Days bcx positive	Alternative source of infx?	OM?	Cellulitis or open wound?	Line related?	Abscess?	Intra-abdominal?	PNA?	UTI?	Other	Abx used?	Abx tx? (ended w/)	Planned longterm abx tx (~4-6wks) +/- PICC?	fever?	< 3 days defervescence or remained afebrile?	defervesced	not defervesced	remained afebrile	WBC downtrend or remained nrml?	TTE used?	TTE date	TTE new valvular veg?	TTE new worsened fxnl findings from previous TTEs?	Time to TTE	TEE used?	TEE date
1	2024-05-30	2024-06-19	20	85	1	2	1	0	1	1	0	0	1	mod TR, MR, AS w/ TAVR, CABG 2000	Methicillin-Resistant Staphylococcus aureus	1	0	0	0	1	11	2024-05-30	2024-06-12	13	0	0	0	0	0	0	0	0	0	1	Daptomycin	1	0	1	0	0	1	1	1	2024-05-31	0	0	1	1	2024-06-03
2	2024-06-03			78	1	3	0	0	0	0	0	0	0		Methicillin-Resistant Staphylococcus aureus	1	0	0	0	1	6	2024-06-03	2024-06-07	4	1	1	0	0	0	0	0	0	0	1	Daptomycin	1	1	1	1	0	0	1	1	2024-06-05	0	0	2	0
7	2024-06-10	2024-07-12	32	45	2	2	0	0	0	0	0	0	0		Staphylococcus aureus	1	0	0	0	0	1	2024-06-12	2024-06-12	0	0	0	0	0	0	0	0	0	0	1	cefazolin	1	0	1	0	0	1	1	1	2024-06-14	0	0	4	0
8	2024-06-13	2024-06-23	10	60	1	3	1	0	0	0	0	0	1	G2DD	Staphylococcus aureus	1	0	0	0	1	2	2024-06-13	2024-06-14	1	1	0	0	0	1	0	0	0	0	1	cefazolin	1	1	1	1	0	0	1	1	2024-06-14	0	0	1	0
9	2024-06-15	2024-06-27	12	64	2	2	1	0	0	0	1	0	0		Staphylococcus aureus	1	0	0	0	1	2	2024-06-20	2024-06-21	1	1	0	1	0	0	0	0	0	0	1	cefazolin	1	1	1	1	0	0	1	1	2024-06-24	0	0	9	0
10	2024-06-25	2024-07-02	7	46	1	2	1	1	0	0	1	1	1	1/4/24 veg seen, sev TR,	Methicillin-Resistant Staphylococcus aureus	1	0	0	0	1	5	2024-06-25	2024-06-30	5	1	1	1	0	1	0	0	0	0	1	Daptomycin	1	1	1	1	0	0	1	1	2024-06-25	1	1	0	0
12	2024-05-01	2024-05-11	10	70	1	5	1	0	0	0	1	0	1	G1DD	Staphylococcus aureus	1	0	0	0	1	2	2024-05-01	2024-05-03	2	1	0	0	1	0	0	0	0	0	1	cefazolin	1	1	1	1	0	0	1	1	2024-05-07	0	1	6	0
13	2024-05-02	2024-05-24	22	91	2	2	1	0	0	0	0	0	1	HFrEF	Staphylococcus aureus	1	0	0	0	1	2	2024-05-02	2024-05-03	1	1	0	0	0	1	0	0	0	0	1	cefazolin	1	1	1	1	0	0	1	1	2024-05-06	0	0	4	0
15	2024-05-08	2024-05-20	12	77	1	2	1	0	0	0	0	0	1	at least mod TR'	Staphylococcus aureus	1	0	0	0	0	1	2024-05-08	2024-05-08	0	1	0	0	0	1	0	0	1	0	1	cefazolin	1	1	1	1	0	0	1	1	2024-05-09	0	0	1	1	2024-05-13
16	2024-05-08	2024-05-23	15	83	2	2	1	0	0	0	0	0	1	PFO, sev biatrial enlarge, G1DD, mod LVH	Staphylococcus aureus	1	0	0	0	1	3	2024-05-17	2024-05-19	2	0	0	0	0	0	0	0	0	0	1	nafcillin	1	1	1	1	0	0	1	1	2024-05-20	0	0	12	0
17	2024-05-26	2024-06-15	20	59	1	3	1	0	0	0	0	0	1	G1DD, mod mitral annular calc	Staphylococcus aureus	1	0	0	0	1	2	2024-05-28	2024-05-29	1	1	0	1	0	0	0	0	0	0	1	cefazolin	1	1	1	1	0	0	1	1	2024-05-30	1	0	4	0
18	2024-04-03	2024-04-13	10	51	1	3	0	0	0	0	0	0	0		Staphylococcus aureus	1	0	0	0	1	3	2024-04-03	2024-04-06	3	1	1	0	0	0	0	0	0	0	1	cefazolin	1	1	1	1	0	0	1	1	2024-04-05	0	0	2	1	2024-04-09
19	2024-04-11	2024-04-16	5	65	2	2	1	0	0	0	0	0	1	thickened AV leaf	Methicillin-Resistant Staphylococcus aureus	1	0	0	0	1	3	2024-04-11	2024-04-12	1	0	0	0	0	0	0	0	0	1	1	Daptomycin	1	0	1	0	0	1	1	1	2024-04-12	0	1	1	0
20	2024-04-10	2024-04-19	9	85	1	2	0	0	0	0	0	0	0		Staphylococcus aureus	1	0	0	0	1	2	2024-04-14	2024-04-14	0	0	0	0	0	0	0	0	0	0	1	cefazolin	1	1	1	1	0	0	1	1	2024-04-18	0	0	8	0
23	2024-04-19	2024-06-04	46	46	2	2	1	1	0	0	1	0	0		Methicillin-Resistant Staphylococcus aureus	1	0	0	0	1	3	2024-04-19	2024-04-22	3	1	0	0	1	0	0	0	0	0	1	vanc	1	0	1	0	0	1	1	1	2024-04-24	0	0	5	1	2024-04-26
24	2024-04-20	2024-04-30	10	87	2	2	1	0	0	0	0	0	1	mod MS, G1DD	Staphylococcus aureus	1	0	0	0	1	2	2024-04-20	2024-04-21	1	0	0	0	0	0	0	0	0	0	1	cefazolin	1	1	1	1	0	0	1	1	2024-04-24	0	0	4	1	2024-04-29
26	2024-04-24	2024-05-12	18	59	2	2	1	0	0	0	1	0	1	G1DD	Staphylococcus aureus	1	0	0	0	1	3	2024-04-24	2024-04-27	3	1	0	0	1	0	0	0	0	0	1	cefazolin	1	1	1	1	0	0	1	1	2024-05-03	1	0	9	0
27	2024-04-21	2024-04-30	9	72	1	2	1	0	0	0	0	0	1	anterolat hypokinesis, apical kinesis, HFmrEF	Staphylococcus aureus	1	0	0	0	1	2	2024-04-25	2024-04-27	2	1	1	0	0	0	0	0	0	1	1	cefazolin	1	1	1	1	0	0	1	1	2024-04-26	0	0	5	0
28	2024-04-24	2024-05-10	16	71	2	2	1	0	0	0	0	0	1	mod TR, G1DD	Staphylococcus aureus	1	0	0	0	1	2	2024-04-27	2024-04-28	1	1	1	0	0	1	0	0	0	1	1	nafcillin	1	1	1	1	0	0	1	1	2024-05-02	0	0	8	0
32	2024-03-04	2024-03-27	23	79	2	2	1	0	0	0	0	0	1	G3DD, mod RV dilation	Methicillin-Resistant Staphylococcus aureus	1	0	0	0	1	5	2024-03-04	2024-03-08	4	0	0	0	0	0	0	0	0	0	1	Daptomycin	1	1	1	1	0	0	1	1	2024-03-06	0	0	2	1	2024-03-13
33	2024-03-05	2024-04-01	27	77	2	3	1	0	0	1	0	0	1	sev biatrial enlarge, mod TR	Staphylococcus aureus	1	0	0	0	1	3	2024-03-13	2024-03-15	2	0	0	0	0	0	0	0	0	0	1	cefazolin	1	0	1	0	0	1	1	1	2024-03-14	0	0	9	1	2024-03-15
34	2024-03-13	2024-03-26	13	95	2	4	0	0	0	0	0	0	0		Staphylococcus aureus	1	0	0	0	1	5	2024-03-13	2024-03-17	4	1	0	0	0	0	0	0	0	1	1	cefazolin	1	1	1	1	0	0	1	1	2024-03-15	0	0	2	0
38	2024-03-30	2024-04-30	31	69	2	3	0	0	0	0	0	0	0		Methicillin-Resistant Staphylococcus aureus	1	0	0	0	0	1	2024-03-30	2024-03-30	0	0	0	0	0	0	0	0	0	0	1	Daptomycin	1	1	1	1	0	0	1	1	2024-04-01	0	1	2	1	2024-04-03
39	2024-05-31	2024-06-12	12	70	2	2	0	0	0	0	0	0	0		Streptococcus mutans	0	1	0	0	0	1	2024-06-01	2024-06-01	0	1	1	0	0	0	0	0	0	0	1	ceftriaxone	1	1	1	1	0	0	1	1	2024-06-05	0	1	5	0
41	2024-06-07	2024-06-13	6	71	1	2	1	0	1	0	0	0	0		Streptococcus gordonii	0	1	0	0	0	1	2024-06-07	2024-06-07	0	0	0	0	0	0	0	0	0	0	1	ceftriaxone	1	1	1	1	0	0	1	1	2024-06-10	0	0	3	1	2024-06-12
42	2024-06-12	2024-06-19	7	83	1	5	0	0	0	0	0	0	0		Streptococcus mitis group	0	1	0	0	0	1	2024-06-12	2024-06-12	0	1	0	0	0	1	0	0	0	0	1	ceftriaxone	1	1	1	1	0	0	1	1	2024-06-14	1	0	2	0
52	2024-03-05	2024-03-15	10	42	1	2	1	0	0	0	0	0	1	bicuspid AV and AS	Streptococcus gordonii	0	1	0	0	1	2	2024-03-05	2024-03-06	1	0	0	0	0	0	0	0	0	0	1	ceftriaxone	1	1	1	1	0	0	1	1	2024-03-06	1	1	1	1	2024-03-08
53	2024-03-06	2024-04-03	28	37	2	2	0	0	0	0	0	0	0		Streptococcus anginosus	0	1	0	0	0	1	2024-03-06	2024-03-06	0	1	0	1	0	1	0	0	0	0	1	cefazolin levofloxacin	1	1	1	1	0	0	1	1	2024-03-08	0	0	2	0
55	2024-03-18	2024-03-26	8	74	2	2	0	0	0	0	0	0	1	G1DD	Streptococcus mitis group	0	1	0	0	0	1	2024-03-18	2024-03-18	0	1	0	0	0	1	0	0	0	1	1	ceftriaxone	1	0	1	0	0	1	1	0					0
57	2024-06-16			55	2	2	1	0	0	1	0	0	1	HCM	Enterococcus faecalis	0	0	1	0	1	4	2024-06-26	2024-06-29	3	0	0	0	0	0	0	0	0	0	1	ceftriaxone ampicillin	1	1	1	1	0	0	1	1	2024-07-12	0	1	26	0
60	2024-05-13	2024-06-01	19	81	1	2	1	0	0	1	0	0	1	HFrEF	Enterococcus faecalis	0	0	1	0	1	2	2024-05-13	2024-05-14	1	1	0	0	0	0	1	0	0	0	1	ceftriaxone ampicillin	1	1	1	1	0	0	1	1	2024-05-17	0	1	4	0
61	2024-03-30	2024-04-05	6	87	2	3	1	0	0	1	0	0	1	G1DD, mod TR	Enterococcus faecalis	0	0	1	0	1	3	2024-03-31	2024-04-02	2	0	0	0	0	0	0	0	0	0	1	piperacillin tazo	1	0	1	0	0	1	1	1	2024-04-01	0	1	2	0
62	2024-04-16	2024-04-21	5	47	1	2	1	1	0	0	0	0	1	sev TR	Enterococcus faecalis	0	0	1	0	1	4	2024-04-16	2024-04-21	5	1	0	1	0	0	0	0	0	0	1	ceftriaxone ampicillin	1	1	1	1	0	0	1	1	2024-04-18	1	0	2	0
63	2024-04-16	2024-05-30	44	54	1	2	1	0	0	0	1	0	0		Enterococcus faecalis	0	0	1	0	1	5	2024-04-16	2024-04-19	3	1	0	0	1	0	0	0	0	0	1	ceftriaxone ampicillin	1	1	1	1	0	0	1	1	2024-04-19	0	0	3	0
66	2024-05-21	2024-05-31	10	71	2	2	1	0	0	0	1	0	1	mod TR, G1DD	Vancomycin resistant Enterococcus faecalis	0	0	1	0	0	1	2024-05-21	2024-05-21	0	1	0	0	1	0	0	0	0	0	1	Daptomycin	1	0	1	0	0	1	1	1	2024-05-24	0	0	3	0
67	2024-04-16	2024-05-30	44	54	1	2	1	0	0	0	1	0	0		Enterococcus faecalis	0	0	1	0	1	5	2024-04-16	2024-04-19	3	1	0	0	1	0	1	0	0	0	1	ceftriaxone ampicillin	1	1	1	1	0	0	1	1	2024-04-19	0	0	3	0
76	2024-06-14	2024-06-25	11	59	1	3	0	0	0	0	0	0	0		Staphylococcus epidermidis	0	0	0	1	1	3	2024-06-14	2024-06-17	3	1	1	1	0	0	0	0	0	0	1	cefazolin	1	1	1	1	0	0	1	1	2024-06-18	0	0	4	1	2024-06-20
108	2024-04-16	2024-04-30	14	78	2	2	1	0	1	0	0	0	1	G2DD, s/p TAVR	Staphylococcus epidermidis	0	0	0	1	1	4	2024-04-16	2024-04-22	6	0	0	0	0	0	0	0	0	0	1	vanc	1	1	1	1	0	0	1	1	2024-04-17	0	1	1	1	2024-04-22
132	2024-03-12	2024-04-19	38	41	1	3	1	0	0	0	1	0	0		Staphylococcus epidermidis	0	0	0	1	0	1	2024-03-19	2024-03-19	0	1	0	0	1	0	0	0	0	0	1	vanc	1	1	1	1	0	0	1	1	2024-03-21	0	0	9	0
																																																	12
												Count of Subject #	TEE used?
												Abx/tx changed based off TEE?	0	1	Grand Total
												0	27	10	37
												1		2	2
												Grand Total	27	12	39
													0	1
												0	25.6154	11.3846
												1	1.38462	0.615385
												0.0668538			0.188142
												4.74324
												1
													Expected	Actual
												NO abx change WITHOUT TEE use	25.6154	27
												NO abx change WITH TEE use	11.3846	10
												abx change WITHOUT TEE use	1.38462	0
												abx change WITH TEE use	0.615385	2
[truncated: 9 more columns]

## Sheet: TTE specific data
Subject #	Admission Date	Discharge Date	LOS	Age	Sex	Race	Comorbidity present (at least 1)?	IVDU	Prosthetic Valve	Intracardiac device	Chronic in-line cath	Previous IE	Cardio-structural abnormality	Type of abnormality	Bcx initial	Bcx repeat positive?	Total sets of positive Bcx	Date initial positive Bcx	Date last positive Bcx	Days bcx positive	Alternative source of infx?	OM?	Cellulitis or open wound?	Line related?	Abscess?	Intra-abdominal?	PNA?	UTI?	Other	Abx used?	Abx tx? (ended w/)	Planned longterm abx tx (~4-6wks) +/- PICC?	fever?	< 3 days defervescence or remained afebrile?	defervesced	not defervesced	remained afebrile	WBC downtrend or remained nrml?	TTE used?	TTE date	TTE new valvular veg?	TTE new worsened fxnl findings from previous TTEs?	Time to TTE	TEE used?	TEE date	TEE new valvular veg?	TEE new anatomical/fxnl findings?	Abx/tx changed based off TEE?	DEFINITE IE dx made (Dukes criteria 2 maj or 1 maj + 3 minor)
1	45442	45462	20	85	1	2	1	0	1	1	0	0	1	mod TR, MR, AS w/ TAVR, CABG 2000	Methicillin-Resistant Staphylococcus aureus	1	11	45442	45455	13	0	0	0	0	0	0	0	0	0	1	Daptomycin	1	0	1	0	0	1	1	1	45443	0	0	1	1	45446	0	0	0	0
2	45446			78	1	3	0	0	0	0	0	0	0		Methicillin-Resistant Staphylococcus aureus	1	6	45446	45450	4	1	1	0	0	0	0	0	0	0	1	Daptomycin	1	1	1	1	0	0	1	1	45448	0	0	2	0					0
3	45448	45465	17	62	1	2	1	0	0	0	0	0	1	thickened AV leaf	Staphylococcus aureus	1	5	45448	45454	6	0	0	0	0	0	0	0	0	1	1	Ertapenem nafcillin	0	1	0	0	1	0	1	1	45448	0	0	0	1	45455	0	1	0	0
4	45449	45455	6	77	1	2	0	0	0	0	0	0	0		Staphylococcus aureus	1	2	45449	45450	1	1	0	0	0	0	0	0	1	1	1	cefazolin	0	1	1	1	0	0	1	1	45450	0	0	1	1	45453	0	0	0	0
5	45453	45456	3	71	1	2	1	0	0	0	1	1	1	G3DD, sev LA dilation	Staphylococcus aureus	1	2	45453	45454	1	1	0	0	0	1	0	0	0	0	1	vanc zosyn	1	1	1	1	0	0	0	1	45454	1	1	1	0					1
6	45454	45465	11	81	1	2	1	0	0	0	0	0	1	mod MR, TR, sev biatrial enlarge	Staphylococcus aureus	1	4	45454	45458	4	1	0	1	0	0	1	0	0	0	1	Ertapenem cefazolin	0	1	1	1	0	0	0	1	45455	0	0	1	0					0
7	45453	45485	32	45	2	2	0	0	0	0	0	0	0		Staphylococcus aureus	0	1	45455	45455	0	0	0	0	0	0	0	0	0	0	1	cefazolin	1	0	1	0	0	1	1	1	45457	0	0	4	0					0
8	45456	45466	10	60	1	3	1	0	0	0	0	0	1	G2DD	Staphylococcus aureus	1	2	45456	45457	1	1	0	0	0	1	0	0	0	0	1	cefazolin	1	1	1	1	0	0	1	1	45457	0	0	1	0					0
9	45458	45470	12	64	2	2	1	0	0	0	1	0	0		Staphylococcus aureus	1	2	45463	45464	1	1	0	1	0	0	0	0	0	0	1	cefazolin	1	1	1	1	0	0	1	1	45467	0	0	9	0					0
10	45468	45475	7	46	1	2	1	1	0	0	1	1	1	1/4/24 veg seen, sev TR,	Methicillin-Resistant Staphylococcus aureus	1	5	45468	45473	5	1	1	1	0	1	0	0	0	0	1	Daptomycin	1	1	1	1	0	0	1	1	45468	1	1	0	0					1
11	45470	45501	31	74	1	2	1	0	0	0	0	0	1	sev calc AV, mod AS, mod TR	Staphylococcus aureus	0	1	45470	45470	0	1	0	1	0	0	0	1	0	0	1	vanc cefepime	0	1	1	1	0	0	0	1	45471	0	1	1	0					0
12	45413	45423	10	70	1	5	1	0	0	0	1	0	1	G1DD	Staphylococcus aureus	1	2	45413	45415	2	1	0	0	1	0	0	0	0	0	1	cefazolin	1	1	1	1	0	0	1	1	45419	0	1	6	0					0
13	45414	45436	22	91	2	2	1	0	0	0	0	0	1	HFrEF	Staphylococcus aureus	1	2	45414	45415	1	1	0	0	0	1	0	0	0	0	1	cefazolin	1	1	1	1	0	0	1	1	45418	0	0	4	0					0
14	45419	45433	14	71	2	2	1	0	0	0	1	0	0		Staphylococcus aureus	1	3	45419	45422	3	1	0	1	1	0	0	0	0	0	1	cefazolin	1	1	0	0	1	0	1	1	45420	0	0	1	0					0
15	45420	45432	12	77	1	2	1	0	0	0	0	0	1	at least mod TR'	Staphylococcus aureus	0	1	45420	45420	0	1	0	0	0	1	0	0	1	0	1	cefazolin	1	1	1	1	0	0	1	1	45421	0	0	1	1	45425	0	0	0	0
16	45420	45435	15	83	2	2	1	0	0	0	0	0	1	PFO, sev biatrial enlarge, G1DD, mod LVH	Staphylococcus aureus	1	3	45429	45431	2	0	0	0	0	0	0	0	0	0	1	nafcillin	1	1	1	1	0	0	1	1	45432	0	0	12	0					0
17	45438	45458	20	59	1	3	1	0	0	0	0	0	1	G1DD, mod mitral annular calc	Staphylococcus aureus	1	2	45440	45441	1	1	0	1	0	0	0	0	0	0	1	cefazolin	1	1	1	1	0	0	1	1	45442	1	0	4	0					1
18	45385	45395	10	51	1	3	0	0	0	0	0	0	0		Staphylococcus aureus	1	3	45385	45388	3	1	1	0	0	0	0	0	0	0	1	cefazolin	1	1	1	1	0	0	1	1	45387	0	0	2	1	45391	0	0	0	0
19	45393	45398	5	65	2	2	1	0	0	0	0	0	1	thickened AV leaf	Methicillin-Resistant Staphylococcus aureus	1	3	45393	45394	1	0	0	0	0	0	0	0	0	1	1	Daptomycin	1	0	1	0	0	1	1	1	45394	0	1	1	0					0
20	45392	45401	9	85	1	2	0	0	0	0	0	0	0		Staphylococcus aureus	1	2	45396	45396	0	0	0	0	0	0	0	0	0	0	1	cefazolin	1	1	1	1	0	0	1	1	45400	0	0	8	0					0
21	45400	45408	8	85	2	2	1	0	0	0	0	0	1	G1DD	Staphylococcus aureus	1	3	45400	45402	2	1	0	0	0	1	0	0	0	0	1	cefazolin	1	1	0	0	1	0	1	1	45404	0	1	4	0					0
22	45401	45408	7	79	1	2	1	0	0	1	0	0	1	G2DD	Staphylococcus aureus	1	1	45401	45401	0	0	0	0	0	0	0	0	0	1	1	cefazolin	1	1	1	1	0	0	0	1	45406	0	0	5	1	45408	0	0	0	0
23	45401	45447	46	46	2	2	1	1	0	0	1	0	0		Methicillin-Resistant Staphylococcus aureus	1	3	45401	45404	3	1	0	0	1	0	0	0	0	0	1	vanc	1	0	1	0	0	1	1	1	45406	0	0	5	1	45408	0	0	0	0
24	45402	45412	10	87	2	2	1	0	0	0	0	0	1	mod MS, G1DD	Staphylococcus aureus	1	2	45402	45403	1	0	0	0	0	0	0	0	0	0	1	cefazolin	1	1	1	1	0	0	1	1	45406	0	0	4	1	45411	0	0	1	0
25	45405	45423	18	66	1	2	1	0	0	0	0	0	1	G2DD	Staphylococcus aureus	1	4	45405	45408	3	1	1	0	0	1	0	0	0	0	1	cefazolin	1	0	1	0	0	1	0	1	45411	0	0	6	0					0
26	45406	45424	18	59	2	2	1	0	0	0	1	0	1	G1DD	Staphylococcus aureus	1	3	45406	45409	3	1	0	0	1	0	0	0	0	0	1	cefazolin	1	1	1	1	0	0	1	1	45415	1	0	9	0					1
27	45403	45412	9	72	1	2	1	0	0	0	0	0	1	anterolat hypokinesis, apical kinesis, HFmrEF	Staphylococcus aureus	1	2	45407	45409	2	1	1	0	0	0	0	0	0	1	1	cefazolin	1	1	1	1	0	0	1	1	45408	0	0	5	0					0
28	45406	45422	16	71	2	2	1	0	0	0	0	0	1	mod TR, G1DD	Staphylococcus aureus	1	2	45409	45410	1	1	1	0	0	1	0	0	0	1	1	nafcillin	1	1	1	1	0	0	1	1	45414	0	0	8	0					0
29	45347	45454	107	54	1	3	0	0	0	0	0	0	0		Methicillin-Resistant Staphylococcus aureus	1	4	45407	45410	3	1	0	1	0	0	0	0	0	0	1	vanc	1	1	0	0	1	0	1	1	45411	0	0	64	0					0
30	45351	45379	28	28	2	2	1	1	0	0	0	0	0		Methicillin-Resistant Staphylococcus aureus	1	3	45351	45353	2	1	0	0	0	0	0	1	0	0	1	vanc	1	1	0	0	1	0	1	1	45352	0	1	1	1	45365	0	1	0	0
31	45343	45368	25	82	1	2	1	0	0	0	1	0	1	sev AS	Staphylococcus aureus	1	2	45351	45352	1	1	0	0	1	0	0	0	1	0	1	vanc	1	0	1	0	0	1	0	1	45352	0	1	9	0					0
32	45355	45378	23	79	2	2	1	0	0	0	0	0	1	G3DD, mod RV dilation	Methicillin-Resistant Staphylococcus aureus	1	5	45355	45359	4	0	0	0	0	0	0	0	0	0	1	Daptomycin	1	1	1	1	0	0	1	1	45357	0	0	2	1	45364	0	0	0	0
33	45356	45383	27	77	2	3	1	0	0	1	0	0	1	sev biatrial enlarge, mod TR	Staphylococcus aureus	1	3	45364	45366	2	0	0	0	0	0	0	0	0	0	1	cefazolin	1	0	1	0	0	1	1	1	45365	0	0	9	1	45366	1	0	0	1
34	45364	45377	13	95	2	4	0	0	0	0	0	0	0		Staphylococcus aureus	1	5	45364	45368	4	1	0	0	0	0	0	0	0	1	1	cefazolin	1	1	1	1	0	0	1	1	45366	0	0	2	0					0
35	45390	45425	35	42	2	4	1	1	0	0	0	0	0		Methicillin-Resistant Staphylococcus aureus	1	5	45393	45398	5	1	1	1	0	0	0	0	0	0	1	Daptomycin	1	1	0	0	1	0	1	1	45397	0	0	7	1	45397	0	0	0	0
36	45378	45380	2	64	2	2	1	0	0	0	0	0	1	G2DD	Staphylococcus aureus	1	3	45378	45379	1	0	0	0	0	0	0	0	0	0	1	cefazolin	1	1	1	1	0	0	0	1	45379	1	1	1	0					1
37	45379	45390	11	87	2	2	1	0	0	1	0	0	0	HFrEF	Staphylococcus aureus	1	4	45379	45382	3	0	0	0	0	0	0	0	0	0	1	nafcillin	1	1	0	0	1	0	0	1	45383	0	0	4	0					1
38	45381	45412	31	69	2	3	0	0	0	0	0	0	0		Methicillin-Resistant Staphylococcus aureus	0	1	45381	45381	0	0	0	0	0	0	0	0	0	0	1	Daptomycin	1	1	1	1	0	0	1	1	45383	0	1	2	1	45385	0	0	1	0
39	45443	45455	12	70	2	2	0	0	0	0	0	0	0		Streptococcus mutans	0	1	45444	45444	0	1	1	0	0	0	0	0	0	0	1	ceftriaxone	1	1	1	1	0	0	1	1	45448	0	1	5	0					0
41	45450	45456	6	71	1	2	1	0	1	0	0	0	0		Streptococcus gordonii	0	1	45450	45450	0	0	0	0	0	0	0	0	0	0	1	ceftriaxone	1	1	1	1	0	0	1	1	45453	0	0	3	1	45455	0	1	0	0
42	45455	45462	7	83	1	5	0	0	0	0	0	0	0		Streptococcus mitis group	0	1	45455	45455	0	1	0	0	0	1	0	0	0	0	1	ceftriaxone	1	1	1	1	0	0	1	1	45457	1	0	2	0					1
43	45460	45465	5	65	1	3	0	0	0	0	0	0	0		Streptococcus mitis group	0	1	45460	45460	0	1	0	0	0	0	0	1	0	0	1	ceftriaxone	0	0	1	0	0	1	1	1	45463	0	1	3	0					0
44	45473	45483	10	55	2	2	1	0	0	0	1	0	0		Streptococcus constellatus	0	1	45473	45473	0	0	0	0	0	0	0	0	0	0	1	levofloxacin	0	1	0	0	1	0	1	1	45475	0	0	2	0					0
45	45421	45426	5	58	1	3	0	0	0	0	0	0	1	sev MR	Streptococcus mutans	0	1	45421	45421	0	1	0	0	0	0	0	0	0	1	1	ceftriaxone gentamycin	0	1	1	1	0	0	1	1	45422	0	0	1	1	45425	1	0	1	1
46	45428	45448	20	77	1	2	0	0	0	0	0	0	0		Streptococcus mitis group	0	1	45429	45429	0	1	0	0	0	0	0	0	0	1	1	vanc	1	1	0	0	1	0	0	1	45433	0	0	5	1	45434	0	0	0	0
47	45433	45447	14	75	1	2	0	0	0	0	0	0	0		Streptococcus mitis group	0	1	45433	45433	0	0	0	0	0	0	0	0	0	0	1	ceftriaxone	0	0	1	0	0	1	1	1	45436	0	0	3	0					0
49	45395	45420	25	78	2	2	0	0	0	0	0	0	0		Streptococcus anginosus	0	1	45395	45395	0	1	0	0	0	0	0	0	0	1	1	meropenem	1	1	0	0	1	0	0	1	45402	0	0	7	0					0
50	45409	45435	26	36	1	3	0	0	0	0	0	0	0		Streptococcus constellatus	0	1	45409	45409	0	1	0	0	0	1	1	0	0	0	1	ceftriaxone	1	1	1	1	0	0	0	1	45413	0	0	4	0					0
51	45410	45415	5	95	2	2	0	0	0	0	0	0	0		Streptococcus mitis group	0	1	45410	45410	0	0	0	0	0	0	0	0	0	0	1	ceftriaxone	0	0	1	0	0	1	1	1	45414	0	0	4	0					0
52	45356	45366	10	42	1	2	1	0	0	0	0	0	1	bicuspid AV and AS	Streptococcus gordonii	1	2	45356	45357	1	0	0	0	0	0	0	0	0	0	1	ceftriaxone	1	1	1	1	0	0	1	1	45357	1	1	1	1	45359	1	1	0	1
53	45357	45385	28	37	2	2	0	0	0	0	0	0	0		Streptococcus anginosus	0	1	45357	45357	0	1	0	1	0	1	0	0	0	0	1	cefazolin levofloxacin	1	1	1	1	0	0	1	1	45359	0	0	2	0					0
54	45359	45366	7	86	1	2	0	0	0	0	0	0	1	G1DD, mod AS	Streptococcus mutans	0	1	45359	45359	0	1	0	0	0	0	0	0	1	0	1	amoxicillin	0	0	1	0	0	1	1	1	45363	0	1	4	0					0
56	45458	45467	9	87	2	5	0	0	0	0	0	0	0	G1DD	Enterococcus faecalis	1	2	45457	45458	1	1	0	0	0	0	0	0	1	0	1	amoxicillin	0	1	1	1	0	0	1	1	45462	0	0	4	0					0
57	45459			55	2	2	1	0	0	1	0	0	1	HCM	Enterococcus faecalis	1	4	45469	45472	3	0	0	0	0	0	0	0	0	0	1	ceftriaxone ampicillin	1	1	1	1	0	0	1	1	45485	0	1	26	0					1
58	45469	45484	15	86	2	2	1	0	0	1	0	0	0		Enterococcus faecalis	0	1	45471	45471	0	1	0	0	0	0	0	0	1	0	1	amoxicillin	0	1	1	1	0	0	1	1	45474	0	1	5	0					0
59	45421	45428	7	77	2	5	0	0	0	0	1	0	1	G1DD	Vancomycin resistant Enterococcus faecalis	1	4	45421	45428	7	1	0	0	1	0	1	0	0	0	1	Daptomycin	1	0	1	0	0	1	0	1	45425	0	0	4	0					0
60	45425	45444	19	81	1	2	1	0	0	1	0	0	1	HFrEF	Enterococcus faecalis	1	2	45425	45426	1	1	0	0	0	0	1	0	0	0	1	ceftriaxone ampicillin	1	1	1	1	0	0	1	1	45429	0	1	4	0					0
61	45381	45387	6	87	2	3	1	0	0	1	0	0	1	G1DD, mod TR	Enterococcus faecalis	1	3	45382	45384	2	0	0	0	0	0	0	0	0	0	1	piperacillin tazo	1	0	1	0	0	1	1	1	45383	0	1	2	0					0
62	45398	45403	5	47	1	2	1	1	0	0	0	0	1	sev TR	Enterococcus faecalis	1	4	45398	45403	5	1	0	1	0	0	0	0	0	0	1	ceftriaxone ampicillin	1	1	1	1	0	0	1	1	45400	1	0	2	0					1
63	45398	45442	44	54	1	2	1	0	0	0	1	0	0		Enterococcus faecalis	1	5	45398	45401	3	1	0	0	1	0	0	0	0	0	1	ceftriaxone ampicillin	1	1	1	1	0	0	1	1	45401	0	0	3	0					0
64	45409	45419	10	82	1	2	1	0	0	0	0	0	1	mod AS	Enterococcus faecalis	0	1	45411	45411	0	1	0	0	0	0	0	0	1	0	1	ampicillin	0	1	1	1	0	0	1	1	45411	0	1	2	0					0
65	45375	45388	13	54	2	2	0	0	0	0	0	0	0		Enterococcus faecalis	1	6	45375	45380	5	1	0	0	0	0	0	0	1	0	1	linezolid	0	1	0	0	1	0	1	1	45380	0	0	5	1	45383	0	0	1	0
66	45433	45443	10	71	2	2	1	0	0	0	1	0	1	mod TR, G1DD	Vancomycin resistant Enterococcus faecalis	0	1	45433	45433	0	1	0	0	1	0	0	0	0	0	1	Daptomycin	1	0	1	0	0	1	1	1	45436	0	0	3	0					0
67	45398	45442	44	54	1	2	1	0	0	0	1	0	0		Enterococcus faecalis	1	5	45398	45401	3	1	0	0	1	0	1	0	0	0	1	ceftriaxone ampicillin	1	1	1	1	0	0	1	1	45401	0	0	3	0					0
70	45449	45477	28	73	2	2	0	0	0	0	0	0	0		Staphylococcus saccarolyticus	0	1	45449	45449	0	1	0	0	0	0	0	0	0	1	1	vanc	0	0	1	0	0	1	0	1	45453	0	1	4	0					0
73	45454	45464	10	76	2	2	0	0	0	0	0	0	0		Staphylococcus epidermidis	0	1	45454	45454	0	0	0	0	0	0	0	0	0	0	1	cefazolin ampicillin sulb	0	0	1	0	0	1	1	1	45455	0	0	1	0					0
74	45454	45463	9	80	1	3	1	0	0	0	1	0	1	G3DD	Staphylococcus pettenkoferi	0	1	45454	45454	0	1	0	0	1	0	0	0	0	0	1	vanc	0	0	1	0	0	1	1	1	45457	0	1	3	0					0
75	45455	45463	8	81	1	3	0	0	0	0	0	0	0		Staphylococcus epidermidis	0	1	45455	45455	0	0	0	0	0	0	0	0	0	0	1	vanc cefepime	0	0	1	0	0	1	1	1	45456	0	0	1	0					0
76	45457	45468	11	59	1	3	0	0	0	0	0	0	0		Staphylococcus epidermidis	1	3	45457	45460	3	1	1	1	0	0	0	0	0	0	1	cefazolin	1	1	1	1	0	0	1	1	45461	0	0	4	1	45463	0	0	0	0
79	45464	45470	6	58	2	2	0	0	0	0	0	0	1	mod MS	Staphylococcus epidermidis	0	1	45464	45464	0	0	0	0	0	0	0	0	0	0	1	ceftriaxone	0	0	1	0	0	1	0	1	45467	0	0	3	0					0
80	45471	45485	14	68	2	2	1	0	0	0	0	0	1	G1DD	Staphylococcus epidermidis	0	1	45471	45471	0	0	0	0	0	0	0	0	0	0	1	cefazolin	0	0	1	0	0	1	1	1	45476	0	1	5	0					0
82	45411	45432	21	72	2	2	0	0	0	0	0	0	0		Staphylococcus epidermidis	0	1	45417	45417	0	0	0	0	0	0	0	0	0	0	1	vanc	0	1	1	1	0	0	1	1	45419	0	1	8	0					0
85	45419	45436	17	57	1	2	0	0	0	0	0	0	0		Staphylococcus capitis	0	1	45419	45419	0	0	0	0	0	0	0	0	0	0	1	ertapenenm	1	1	0	0	1	0	0	1	45432	0	0	13	0					0
86	45421	45443	22	57	2	2	0	0	0	0	0	0	0		Staphylococcus epidermidis	0	1	45421	45421	0	0	0	0	0	0	0	0	0	0	1	vanc	0	1	0	0	1	0	1	1	45427	0	0	6	0					0
88	45423	45427	4	90	2	2	1	0	1	0	0	0	1	sev AS s/p TAVR, G2DD	Staphylococcus epidermidis	0	1	45423	45423	0	0	0	0	0	0	0	0	0	0	0		0	0	1	0	0	1	1	1	45427	0	1	4	0					0
89	45423	45426	3	83	1	2	1	0	0	0	0	0	1	G3DD	Staphylococcus epidermidis	0	1	45423	45423	0	0	0	0	0	0	0	0	0	0	1	vanc	0	0	1	0	0	1	1	1	45426	0	0	3	0					0
91	45425	45430	5	94	2	2	0	0	0	0	0	0	0		Staphylococcus epidermidis	0	1	45425	45425	0	0	0	0	0	0	0	0	0	0	1	ceftriaxone	0	0	1	0	0	1	1	1	45426	0	0	1	0					0
92	45427	45430	3	79	1	4	1	0	0	0	0	0	1	HFrEF, mod MR	Staphylococcus hominis	0	1	45427	45427	0	0	0	0	0	0	0	0	0	0	1	vanc ceftriaxone	0	0	1	0	0	1	1	1	45429	0	0	2	0					0
94	45433	45440	7	75	1	2	0	0	0	0	0	0	0		Staphylococcus epidermidis	0	1	45433	45433	0	0	0	0	0	0	0	0	0	0	1	ceftriaxone	0	0	1	0	0	1	1	1	45440	0	0	7	0					0
95	45434	45439	5	90	1	2	1	0	0	0	0	0	1	mod TR, sev biatrial enlarge	Staphylococcus epidermidis	1	2	45434	45434	0	0	0	0	0	0	0	0	0	0	1	cefepime	0	0	1	0	0	1	1	1	45436	0	0	2	0					0
98	45439	45445	6	75	2	3	1	0	0	0	0	0	1	HFrEF, sev thickened MV AV	Staphylococcus epidermidis	0	1	45439	45439	0	0	0	0	0	0	0	0	0	0	1	vanc	0	0	1	0	0	1	1	1	45440	0	1	1	0					0
103	45390	45488	98	51	1	2	1	0	0	0	1	0	1	HFrEF	Staphylococcus epidermidis	0	1	45390	45390	0	1	0	0	1	0	0	0	0	0	1	cefazolin	0	0	1	0	0	1	1	1	45391	0	0	1	0					0
105	45395	45401	6	81	2	2	0	0	0	0	0	0	1	G1DD	Staphylococcus epidermidis	0	1	45395	45395	0	1	0	0	0	0	0	0	1	0	1	vanc	0	0	1	0	0	1	1	1	45399	0	0	4	0					0
106	45396	45412	16	66	1	2	0	0	0	0	0	0	0		Staphylococcus haemolyticus	1	2	45396	45397	1	0	0	0	0	0	0	0	0	0	1	vanc	0	1	1	1	0	0	1	1	45401	0	0	5	0					0
107	45398	45401	3	79	1	2	1	0	1	0	0	0	1	G1DD, s/p TAVR	Staphylococcus epidermidis	0	1	45398	45398	0	0	0	0	0	0	0	0	0	0	1	ceftriaxone	0	0	1	0	0	1	1	1	45400	0	0	2	0					0
108	45398	45412	14	78	2	2	1	0	1	0	0	0	1	G2DD, s/p TAVR	Staphylococcus epidermidis	1	4	45398	45404	6	0	0	0	0	0	0	0	0	0	1	vanc	1	1	1	1	0	0	1	1	45399	0	1	1	1	45404	1	1	0	1
113	45407	45431	24	89	2	3	0	0	0	0	0	0	0		Staphylococcus hominis	0	1	45407	45407	0	0	0	0	0	0	0	0	0	0	1	cefepime	0	0	1	0	0	1	1	1	45419	0	1	12	0					0
114	45408	45429	21	88	2	2	1	0	0	1	0	0	1	mod TR	Staphylococcus epidermidis	0	1	45408	45408	0	0	0	0	0	0	0	0	0	0	1	vanc meropenem	0	0	1	0	0	1	0	1	45419	0	1	11	0					0
115	45409	45413	4	43	2	2	1	0	0	0	0	0	1	MVP s/p repair	Staphylococcus capitis	0	1	45409	45409	0	0	0	0	0	0	0	0	0	0	1	vanc	0	0	1	0	0	1	1	1	45411	0	0	2	0					0
119	45354	45365	11	65	1	2	0	0	0	0	0	0	0		Staphylococcus epidermidis	0	1	45354	45354	0	0	0	0	0	0	0	0	0	0	1	doxycycline	0	0	1	0	0	1	1	1	45357	0	0	3	0					0
120	45354	45358	4	77	2	3	0	0	0	0	0	0	0		Staphylococcus capitis	0	1	45354	45354	0	0	0	0	0	0	0	0	0	0	1	vanc	0	1	1	1	0	0	1	1	45357	0	0	3	0					0
121	45356	45363	7	70	1	2	0	0	0	0	0	0	0		Staphylococcus epidermidis	0	1	45356	45356	0	0	0	0	0	0	0	0	0	0	1	vanc cefepime	0	0	1	0	0	1	1	1	45362	0	1	6	0					0
123	45359	45362	3	75	1	3	1	0	0	0	0	0	1	G1DD	Staphylococcus hominis	0	1	45359	45359	0	0	0	0	0	0	0	0	0	0	1	ceftriaxone	0	0	1	0	0	1	1	1	45361	0	1	2	0					0
125	45361	45373	12	71	1	2	1	0	0	0	1	0	0		Staphylococcus epidermidis	0	1	45361	45361	0	1	0	0	1	0	0	0	0	0	1	linezolid levofloxacin	0	1	1	1	0	0	1	1	45362	0	0	1	0					0
126	45362	45367	5	80	2	2	1	0	0	0	0	0	1	G1DD	Staphylococcus hominis	0	1	45362	45362	0	0	0	0	0	0	0	0	0	0	1	cefuroxime	0	1	1	1	0	0	0	1	45366	0	0	4	0					0
127	45362	45370	8	61	1	3	0	0	0	0	0	0	0		Staphylococcus hominis	0	1	45362	45362	0	0	0	0	0	0	0	0	0	0	1	cefepime	0	1	1	1	0	0	1	1	45364	0	0	2	0					0
128	45365	45377	12	54	1	2	1	0	0	0	1	0	0		Staphylococcus epidermidis	0	1	45365	45365	0	1	0	0	1	0	0	0	0	0	1	daptomycin	0	1	1	1	0	0	1	1	45370	0	0	5	0					0
131	45368	45376	8	23	2	2	0	0	0	0	0	0	0		Staphylococcus epidermidis	0	1	45368	45368	0	0	0	0	0	0	0	0	0	0	1	vanc	0	1	0	0	1	0	1	1	45373	0	0	5	0					0
132	45363	45401	38	41	1	3	1	0	0	0	1	0	0		Staphylococcus epidermidis	0	1	45370	45370	0	1	0	0	1	0	0	0	0	0	1	vanc	1	1	1	1	0	0	1	1	45372	0	0	9	0					0
	DEF dx IE vs TTE fxnl changes					POSS dx IE vs TTE fxnl changes					TEE use vs TTE fxnl changes
	Count of Subject #	TTE new worsened fxnl findings from previous TTEs?				Count of Subject #	TTE new worsened fxnl findings from previous TTEs?				Count of Subject #	TTE new worsened fxnl findings from previous TTEs?
	DEFINITE IE dx made (Dukes criteria 2 maj or 1 maj + 3 minor)	0	1	Grand Total		POSS IE Dukescirteria (1 maj + 1 minor or 3 minor)	0	1	Grand Total		TEE used?	0	1	Grand Total
	0	62	24	86		0	30	12	42		0	53	26	79
	1	7	6	13		1	39	18	57		1	16	4	20
	Grand Total	69	30	99		Grand Total	69	30	99		Grand Total	69	30	99
		0	1				0	1				0	1
	0	59.9394	26.0606			0	29.2727	12.7273			0	55.0606	23.9394
	1	9.06061	3.93939			1	39.7273	17.2727			1	13.9394	6.06061
	0.182117					0.747595					0.261707
[truncated: 5 more columns]

[truncated: 1 more sheets: chisq analysis]
